# Supplementary material for: Cost-effectiveness of a European preventive cardiology programme in primary care: a Markov modelling approach
Source: PubMed Central journal article supplement — BMJ Open. 2012 Oct 11;2(5):e001029. doi: 10.1136/bmjopen-2012-001029 (PMC3488746; doi:10.1136/bmjopen-2012-001029), 2012-10-11
Supplement: bmjopen-2012-001029.draft_revisions.pdf [file bmjopen-2012-001029.draft_revisions.pdf]

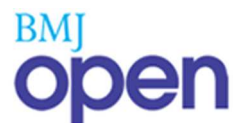

**Cost-effectiveness of a European preventive cardiology programme in primary care: A Markov Modelling Approach**

|                                    |                                                                                                                                                                                                                                                                                                                                                                                                                               |
|------------------------------------|-------------------------------------------------------------------------------------------------------------------------------------------------------------------------------------------------------------------------------------------------------------------------------------------------------------------------------------------------------------------------------------------------------------------------------|
| Journal:                           | <i>BMJ Open</i>                                                                                                                                                                                                                                                                                                                                                                                                               |
| Manuscript ID:                     | bmjopen-2012-001029                                                                                                                                                                                                                                                                                                                                                                                                           |
| Article Type:                      | Research                                                                                                                                                                                                                                                                                                                                                                                                                      |
| Date Submitted by the Author:      | 16-Feb-2012                                                                                                                                                                                                                                                                                                                                                                                                                   |
| Complete List of Authors:          | Mistry, Hema; University of Birmingham, Health Economics Unit<br>Morris, Stephen; University College London, Health Care Evaluation Group<br>Dyer, Matthew; Creativ-Ceutical,<br>Kotseva, Kornelia; Imperial College London, Department of Cardiovascular<br>Medicine<br>Wood, David; Imperial College London, Department of Cardiovascular<br>Medicine<br>Buxton, Martin; Brunel University, Health Economics Research Group |
| <b>Primary Subject<br>Heading</b>: | Health economics                                                                                                                                                                                                                                                                                                                                                                                                              |
| Secondary Subject Heading:         | Cardiovascular medicine                                                                                                                                                                                                                                                                                                                                                                                                       |
| Keywords:                          | HEALTH ECONOMICS, CARDIOLOGY, PRIMARY CARE                                                                                                                                                                                                                                                                                                                                                                                    |
|                                    |                                                                                                                                                                                                                                                                                                                                                                                                                               |

SCHOLARONE™  
Manuscripts

1  
2  
3  
4  
5  
6  
7  
8  
9  
10  
11  
12  
13  
14  
15  
16  
17  
18  
19  
20  
21  
22  
23  
24  
25  
26

# Cost-effectiveness of a European preventive cardiology programme in primary care

Hema Mistry<sup>\*ab</sup>

Stephen Morris<sup>c</sup>

Matthew Dyer<sup>d</sup>

Kornelia Kotseva<sup>e</sup>

David Wood<sup>e</sup>

Martin Buxton<sup>a</sup>

and on behalf of the EUROACTION study group

27  
28  
29  
30  
31  
32  
33  
34  
35  
36  
37  
38  
39  
40  
41  
42  
43  
44  
45  
46  
47  
48  
49  
50  
51  
52  
53  
54  
55  
56  
57  
58  
59  
60

<sup>a</sup>Health Economics Research Group, Brunel University, Uxbridge, UB8 3PH, UK

<sup>b</sup>Health Economics Unit, University of Birmingham, Birmingham, B15 2TT, UK

<sup>c</sup>Health Care Evaluation Group, University College London, London, WC1E 6BT, UK

<sup>d</sup>Creativ-Ceutical, 29-30 Windmill Street, London, W1T 2JL, UK

<sup>e</sup>Department of Cardiovascular Medicine, International Centre for Circulatory Health,  
National Heart and Lung Institute, Imperial College London, London, W2 1LA, UK

\*Corresponding author:

Dr Hema Mistry

Research Fellow in Health Economics

Health Economics Unit

University of Birmingham

Edgbaston

Birmingham, UK, B15 2TT

Tel. +44 (0)121 414 8970

Email: [H.Mistry@bham.ac.uk](mailto:H.Mistry@bham.ac.uk)

1  
2  
3 **Abstract (word count 300)**  
4  
5

6 **Objective:** To investigate the longer-term cost-effectiveness of a nurse-coordinated  
7 preventive cardiology programme for primary prevention of cardiovascular disease  
8 compared to routine practice from a health service perspective.  
9

10  
11  
12  
13  
14 **Design:** A matched, paired cluster-randomised controlled trial.  
15  
16

17  
18  
19 **Setting:** Six pairs of general practices in six countries.  
20

21  
22  
23 **Participants:** 1,019 patients were randomised to the EUROACTION intervention  
24 programme and 1,005 patients to usual care.  
25  
26

27  
28  
29 **Outcome measures:** Evidence on health outcomes and costs were based on patient level  
30 data from the study, which had a one-year follow-up period. Future risk of cardiovascular  
31 (CVD) events was modelled, using published risk models based on patient characteristics.  
32 An individual level Markov model for each patient was used to extrapolate beyond the end of  
33 the trial, which was populated with data from published sources. We used an 11-year time  
34 horizon and investigated the impact on cost-effectiveness of varying the duration of the  
35 effect of the intervention beyond the end of the trial. Results are expressed as incremental  
36 cost per quality-adjusted life year gained.  
37  
38  
39  
40  
41  
42  
43  
44  
45

46  
47 **Results:** Unadjusted results found the intervention to be more costly and also more effective  
48 than usual care. However, after adjusting for differences in age, gender, country and  
49 baseline risk factors, the intervention was dominated by usual care, but this analysis was not  
50 able to take into account of lifestyle changes in terms of diet and physical activity.  
51  
52  
53  
54  
55  
56  
57  
58  
59  
60

1  
2  
3 **Conclusions:** Although the EUROACTION study achieved healthier lifestyle changes and  
4 improvements in management of blood pressure and lipids for patients at high risk of CVD,  
5 compared to usual care, it was not possible to show, using available risk equations which do  
6 not incorporate diet and physical activity, that the intervention reduced longer-term  
7 cardiovascular risk cost-effectively. Whether or not an intervention such as that offered by  
8 EUROACTION is cost-effective requires a longer term trial with major cardiovascular events  
9 as the outcome.  
10  
11  
12  
13  
14  
15  
16  
17  
18  
19  
20  
21  
22  
23  
24  
25  
26  
27  
28  
29  
30  
31  
32  
33  
34  
35  
36  
37  
38  
39  
40  
41  
42  
43  
44  
45  
46  
47  
48  
49  
50  
51  
52  
53  
54  
55  
56  
57  
58  
59  
60

## Article summary

### Article focus

- To investigate the longer-term cost-effectiveness of a nurse-coordinated preventive cardiology programme for primary prevention of cardiovascular disease compared to routine practice.

### Key messages

- The EUROACTION study achieved healthier lifestyle changes and improvements in management of blood pressure and lipids for patients at high risk of CVD, compared to usual care.
- The unadjusted results of the cost effectiveness analysis found the intervention to be more effective than usual care but also more costly. However, the adjusted results showed that the intervention was dominated by usual care.
- The published cardiovascular risk equations do not take account of lifestyle changes in terms of diet and physical activity and therefore may be inadequate for the evaluation of whether or not a lifestyle intervention to prevent cardiovascular disease is cost-effective.

### Strengths and limitations of the study

- This is the first study assessing the cost-effectiveness of the EUROACTION programme.
- The available cardiovascular risk modelling is based on a limited number of risk factors, which do not include measures of diet or physical activity, and a healthier lifestyle was the most important outcome of the EUROACTION trial.

**Trial Registration number:** ISRCTN 71715857

**Keywords:** Multi-centre studies; cardiovascular prevention programme; cost-effectiveness; Markov model; QALYs.

**Text word Count:** 3,064

## Introduction

Evidence has shown that individuals with increased risk of cardiovascular disease (CVD) can reduce their risk of cardiovascular morbidity and mortality by stopping smoking, changing their diet, engaging in physical activity, achieving a healthy body weight, and controlling their blood pressure, cholesterol and diabetes.[1] However, not all patients at high risk of developing CVD manage to achieve these recommended lifestyle and risk factor goals and there remains considerable potential to reduce CVD risk in these patients.[2] The EUROACTION study was designed to address the need for preventive cardiology care in everyday clinical practice.[3]

The EUROACTION study was a matched, paired cluster-randomised controlled trial, across eight countries and 24 hospitals and general practices. The project evaluated the impact of a nurse-coordinated, multidisciplinary preventive cardiology programme for coronary patients in hospital and high risk individuals in general practice. It aimed to help all these high risk patients and their families to achieve recommended lifestyle and risk factor targets for CVD prevention in everyday clinical practice over one year. The principal results concluded that the EUROACTION programme achieved healthier lifestyle changes and improvements in risk factor management for patients with coronary heart disease (CHD) and those at high risk of CVD, together with their partners, compared to usual care.[4]

While there is evidence that the EUROACTION programme is effective in terms of modifying lifestyle and some CVD risk factors, there is no evidence as to its cost-effectiveness.

Therefore, this paper aims to model the long-term cost-effectiveness of the EUROACTION programme in comparison with usual care within the primary care setting.

## Methods

### *Patients*

1  
2 The EUROACTION primary care study took place in Denmark, Italy, Netherlands, Poland,  
3 Spain and UK, where a matched pair of general practices was identified, and then  
4 randomised to either the EUROACTION programme or to usual care (UC). GPs  
5 prospectively identified the study population. The comparison was restricted to patients and  
6 did not include partners. Eligibility criteria for patients has previously been published.[4]  
7  
8  
9  
10  
11

12  
13 All intervention patients were assessed at baseline and one-year. These assessments  
14 focussed on smoking habits, diet and physical activity, measurement of body mass index,  
15 blood pressure, cholesterol and glucose levels, and cardiac medications were also recorded.  
16  
17 The programme was delivered by specialist nurses, working with GPs, and supported by  
18 software programmes (HEARTSCORE), educational materials and group workshops to  
19 achieve individual goals. Each person was given a personal record card to record lifestyle  
20 and risk factor goals, medications and appointments. To avoid the possibility that  
21 undergoing baseline assessments might affect outcomes, only a random sub-sample  
22 (~25%) of UC patients were seen at baseline and then all UC patients were invited for  
23 assessment at one-year. In the UC arm, patients did not receive any form of special care.  
24  
25  
26  
27  
28  
29  
30  
31  
32  
33  
34  
35  
36

### 37 ***Model structure***

38  
39 We adopted a health service perspective to measure costs and outcomes. Each cycle in the  
40 model is of one year's duration. All patients were CVD-free on entering the model. In each  
41 subsequent cycle patients may remain CVD-event free, they may have a fatal or non-fatal  
42 CVD event, or they may die from non-CVD causes. Once the patient has had an initial CVD  
43 event, then in subsequent cycles they move to the post CVD-event states and they may  
44 move between different CVD states and/or die from CVD or non-CVD causes.  
45  
46  
47  
48  
49  
50  
51  
52

53 The CVD event states are: non-fatal myocardial infarction (MI), stable angina, unstable  
54 angina, CHD death, transient ischaemic attack (TIA), stroke, CVD death and non-CVD  
55 death.  
56  
57  
58  
59  
60

### ***Measuring initial CVD risk***

To estimate the risk of an initial CVD event in a subsequent year we used the D'Agostino et al [5] CVD risk function, derived from the Framingham Heart Study. This calculates individual sex-specific risks for future cardiovascular events (in patients initially free of CVD). These CVD risk equations incorporate as risk factors the natural logarithms of age, total and HDL cholesterol, systolic blood pressure (SBP) if treated with or without anti-hypertensive medications, smoking and diabetes. We used the published calibration factors to focus on the CHD and stroke event states.

Ten-year risks were estimated from the equations and adjusted to one-year values.[6] One-year CVD risk beyond the end of the trial was calculated based on both a) baseline patient characteristics (adjusted for age) for intervention patients only; and b) one-year follow-up characteristics for both groups, in order to evaluate any changes to CVD risk factors as a result of the EUROACTION programme.

### ***Validating the appropriateness of the risk functions of the model***

We tested the validity of applying the D'Agostino et al [5] risk equations to the study population, by comparing the observed number of CHD cases with the number predicted at one-year. Because stroke and TIA incidence data was not collected in the study we converted the CVD risk equations to CHD risks using the recommended calibration factors.[5] We present the results of the comparison for both groups.

### ***Transition probabilities***

We disaggregated the overall risk of a CVD event into rates for specific events by age and gender, using UK relative incidence rates based on published literature [7-9] and expert opinion, as previously used in Ward et al [10]. These event rates were applied to individual annual CVD risks to calculate individual transition probabilities for moving from the CVD-free



1  
2 state to the initial CVD-event states. Also, individual patients could die from non-vascular  
3 causes, depending on their age and gender. The non-CVD death transition probabilities  
4 were taken from Briggs et al.[11] Transition probabilities for moving from primary event  
5 health states to subsequent non-fatal health states are taken from Ward et al.[10]  
6  
7  
8  
9

### 10 11 12 **Measuring cost**

13  
14 Data on resources used during the trial and staff contacts were recorded in case record  
15 forms and then converted into electronic format. To determine the total one-year costs for  
16 each group, we obtained unit costs for all relevant items of resources used in the trial:  
17  
18  
19

20  
21  
22 *1. Costs relating to EUROACTION programme and other contacts in primary care were*  
23 *obtained from the programme facilitators and included the EUROACTION nurses costs,*  
24 *training costs, production of patient educational materials and any other costs*  
25 *associated with implementing the programme. The average time spent by staff for all*  
26 *patient contacts at baseline and one-year was provided by each centre. Hourly wage*  
27 *rates of the staff salaries and training were calculated and then applied to these various*  
28 *patient contacts. We costed the EUROACTION family information packs, a pocket-*  
29 *sized personal record card, questionnaires and group sessions that each patient in the*  
30 *intervention group received as part of their prevention programme.*  
31  
32  
33  
34  
35  
36  
37  
38  
39  
40  
41  
42

43  
44 Costs were applied to other contacts with health care professionals, such as GPs,  
45 outside of the intervention programme for both arms and these costs were based on  
46 national estimates of the staff salaries involved and estimates of the average time spent  
47 with the patient provided by the trial co-ordinators.  
48  
49  
50

51  
52  
53 *2. Cardiac-related drug costs.* Data was collected on patient-specific cardiac-related  
54 medications including the drug name and dose at baseline and one-year. This gave  
55 point of time information, but no start or end dates. So for each patient it was assumed  
56  
57  
58  
59  
60

1  
2 that they would remain on the same medication at a constant dose for the entire  
3  
4 duration e.g. from baseline to one-year. National cost estimates for the drugs were  
5  
6 provided by trial co-ordinators from each country and were applied accordingly to the  
7  
8 relevant dose and length of time on a patient-specific basis.  
9

10  
11  
12 *3. Cardiac-related procedures and tests.* During the trial, patients within both groups  
13  
14 may have required inpatient or outpatient admissions for cardiac-related procedures, or  
15  
16 undertaken any cardiac-related tests. The procedures were costed according to HRG  
17  
18 episodes for each country and the other tests or bed days as simple unit costs.  
19  
20 National unit cost estimates for cardiac-related procedures and tests for each country  
21  
22 were obtained from a database held by United BioSource Corporation (Erwin De Cock,  
23  
24 personal communication, May 2007) for all countries, except Denmark and Poland. For  
25  
26 these two countries, national unit cost estimates were provided from contacts within the  
27  
28 Centre for Applied Health Services Research and Technology in Denmark (Jan  
29  
30 Sørensen, personal communication, January 2007) and from the Ministry of Health in  
31  
32 Poland (Andrzej Pająk, personal communication, June 2007).  
33  
34  
35  
36

37 As the study was based in six countries, a costing algorithm was developed to calculate a  
38  
39 total cost per patient for each country. The costs of the programme were valued in local  
40  
41 currencies and then converted to 2006/2007 £ (GBP) using purchasing power parities.[12]  
42  
43 Table 1 presents the total one-year costs by group and country.  
44  
45  
46

47 Subsequent costs relating to health states occupied within the model were based on UK  
48  
49 estimates (see Appendix). It was assumed that patients in a CVD-free state would continue  
50  
51 to receive the cardiac-related medications and primary care contacts (outside of the  
52  
53 intervention programme) that they received during the trial. The mean cost of these  
54  
55 medications and contacts for all patients across both arms was applied to each individual  
56  
57 patient within the model who remained in the event-free health state for subsequent years.  
58  
59  
60

### ***Health state utilities***

To estimate quality-adjusted life years (QALYs) the model requires utility values for each state adjusted by age. For patients who were event-free, the utility values were based on UK general population norms [13]; utilities for events/states were taken from Ward et al [10] which were all were based on UK studies and were obtained using the EQ-5D (see Appendix).

### ***Measuring the impact of the intervention***

The study provided results only for a one-year follow-up. We estimated results for a range of possible durations of effect, assuming that the CVD risk reduction experienced by the intervention patients persisted for 0 through to 10 additional years (11-year time horizon), after which they reverted to their individual CVD risk factor levels at the start of the study (adjusted for age). For UC patients, it was assumed that patients would remain at their one-year CVD risk (adjusted annually by age) throughout the model.

### ***Measuring cost-effectiveness***

Using the Markov model we calculated for each patient their expected quality-adjusted survival (based on their likelihood of surviving each cycle and their expected health state utility value) and their expected costs. Cost-effectiveness was measured in terms of the incremental cost per QALY gained (ICER). Future costs and benefits were discounted at 3.5%. [14]

### ***Statistical analyses***

All statistical analyses were performed in Stata version 10 [15] or Microsoft Excel and a p-value  $\leq 0.05$  was considered to be statistically significant. We present unadjusted and adjusted cost-effectiveness results. The adjusted results controlled for group allocation, age, gender, age\*gender interactions, country, and baseline risk factors using OLS regressions.

1  
2 As only a random sub-sample of UC patients were seen at baseline, regression analyses  
3  
4 were used to predict baseline values for those patients who had missing values. For total  
5  
6 and HDL cholesterol and SBP, OLS regression was used to predict values in those patients  
7  
8 with missing values, as a function of age, gender and country. For the three binary variables  
9  
10 (medications, smoking and diabetes), logistic regression models were used to predict the  
11  
12 probability of each binary outcome. Predicted values  $\geq 0.5$  were categorised to a value of 1  
13  
14 and values  $< 0.5$  were categorised as 0. In the adjusted models we also included an  
15  
16 indicator for whether or not each control variable was missing.  
17  
18

19  
20  
21 Bootstrapping was undertaken on both unadjusted and adjusted costs and effects using  
22  
23 10,000 replications to provide 95% confidence intervals around the mean. Probabilistic  
24  
25 sensitivity analyses were conducted to obtain cost-effectiveness acceptability curves  
26  
27 (CEACs).  
28

### 30 31 ***Sensitivity analysis***

32  
33 The main analysis modelling was limited to ten years, in the absence of robust longer-term  
34  
35 risk models. As a sensitivity analysis, we used a simplified longer-term model to check  
36  
37 whether the conclusions of the main analysis would have been likely to be different if a  
38  
39 longer-term perspective had been adopted e.g. 25 years. This model essentially assumed  
40  
41 no further effect of the intervention but modelled out fully the possible QALY gains from the  
42  
43 medium-term (11 year) differences in mortality and event rates.  
44  
45

### 46 47 **Results**

48  
49 We modelled 1,019 patients in the intervention arm and 1,005 patients in the UC arm who  
50  
51 were assessed at one-year.[4] The intervention group had fewer males than the UC group:  
52  
53 49.8% vs. 57.4% male ( $p=0.001$ ), and was significantly younger (mean age at one-year:  
54  
55 intervention: 61.5 years vs. usual care: 62.3 years,  $p=0.011$ ).  
56  
57  
58  
59  
60

1  
2  
3  
4  
5  
6  
7  
8  
9  
10  
11  
12  
13  
14  
15  
16  
17  
18  
19  
20  
21  
22  
23  
24  
25  
26  
27  
28  
29  
30  
31  
32  
33  
34  
35  
36  
37  
38  
39  
40  
41  
42  
43  
44  
45  
46  
47  
48  
49  
50  
51  
52  
53  
54  
55  
56  
57  
58  
59  
60

When testing the validity of the Framingham risk equations to the study population we found that 8 intervention patients and 1 UC sub-sample patient experienced a CHD-event. The risk equations produced a close match, predicting 8.5 patients with a first CHD-event in the intervention group and 2.0 in the UC sub-sample.

In terms of the unadjusted results, the incremental costs of the intervention are £362-£419 depending on the duration of the effect of the intervention and the incremental QALYs are 0.076-0.085 (see Table 2). As expected, the incremental costs fall and the incremental QALYs rise as the duration of the effect of the intervention beyond the end of the trial increases. The incremental cost per QALY gained range from £5,539 (95% CI £2,625-£29,627) to £4,266 (95% CI £2,059-£15,945). The unadjusted CEACs under each scenario are in Figure 1a and highlights the results in Table 2 that in all scenarios over 95% of the bootstrapped replications are less than £20,000.

After controlling for differences in age, gender, country and baseline risk factors, the intervention is associated with higher costs and lower QALYs than the UC arm in every scenario. As a result, the intervention is dominated by UC. The adjusted CEACs are in Figure 1b (additional adjusted CEACs, controlling for age, gender and country only are in the Appendix). At a cost-effectiveness threshold of £20,000 the EUROACTION intervention will be cost-effective in under 6% of cases.

The sensitivity analysis produced predictable results that in no way changed the conclusions of the analysis. Using the unadjusted data, the cost-effectiveness of the intervention was further enhanced, and using the adjusted data the domination of UC over the intervention remained.

## Discussion

1  
2 Although this large European trial demonstrated that a nurse-coordinated preventive  
3 cardiology programme in primary care helped more high risk patients to achieve the lifestyle  
4 and risk factor targets in comparison with UC this does not appear to be cost-effective.  
5  
6 However, these cost-effectiveness analyses require careful qualification because they are  
7  
8 subject to a number of uncertainties which are a consequence of the study design and  
9  
10 important limitations in the statistical model used.  
11  
12  
13

14  
15  
16 The differences in the adjusted and unadjusted results emphasise that the study design,  
17 based on matching pairs of general practices in each country, did not eliminate baseline  
18 differences between the two groups in cardiovascular risk factors. These differences meant  
19 that the two groups had different levels of baseline risk, higher in intervention than usual  
20 care, but the economic results have adjusted for these baseline differences. Though these  
21 differences were small in absolute terms they have a substantial effect on the estimates of  
22 absolute risk of future cardiovascular events, and therefore on the difference in effectiveness  
23 between intervention and UC. Additionally, the study recorded its primary endpoints at  
24 baseline and one-year, and to avoid 'contamination' by recording risk factor levels in UC,  
25 baseline measurements were only made in a sub-sample of UC patients. Thus, we do not  
26 have before and after measurements for 75% of the UC patients.  
27  
28  
29  
30  
31  
32  
33  
34  
35  
36  
37  
38  
39

40  
41 Our estimates of the risk of future CVD-events are based on published risk equations.[5]  
42 These are derived from a large, well characterised cohort (8491 participants) and predict  
43 CVD risk as opposed to CHD risk alone. The C statistic for the model ranges from 0.76  
44 (men) to 0.79 (women) suggesting that additional risk factors could potentially improve the  
45 model's discriminatory power. Other risk models have included risk factors such as family  
46 history of CVD, social deprivation and biomarkers e.g. hs-CRP [16-17] although these  
47 models also have their own limitations.  
48  
49  
50  
51  
52  
53  
54  
55  
56  
57  
58  
59  
60

1  
2  
3  
4  
5  
6  
7  
8  
9  
10  
11  
12  
13  
14  
15  
16  
17  
18  
19  
20  
21  
22  
23  
24  
25  
26  
27  
28  
29  
30  
31  
32  
33  
34  
35  
36  
37  
38  
39  
40  
41  
42  
43  
44  
45  
46  
47  
48  
49  
50  
51  
52  
53  
54  
55  
56  
57  
58  
59  
60

However, to date lifestyle factors such as dietary habits and physical inactivity although important in the aetiology of CHD [18] and independent of the other major risk factors, have not been included in such risk scores, because they are difficult to accurately quantify. The omission of these important lifestyle factors in the Framingham risk equations may be particularly relevant in our study as the cornerstone of the EUROACTION programme was lifestyle change which was clearly evident in the study's most striking achievements in this area including significantly higher fruit and vegetable consumption ( $p = 0.005$ ); physical activity levels ( $p = 0.01$ ); and weight loss ( $p = 0.005$ ).

It is thus possible that our estimates of relative differences in absolute risk between the groups may understate the full effects of the intervention on long-term CVD risk. However, we showed that the risk equations are able to predict CHD events in the study population in the one-year follow-up period, but the accuracy of the risk equations over the ten-year period of our study remains untested.

Our modelling also requires an assumption about how long any differential effect of the intervention persists. Nothing is known about the longer-term effects of EUROACTION, and there are few studies that have looked at longer-term changes. The longest follow-up to a relevant life-style change appears to be the OXCHECK study which showed that the benefits of health checks were sustained over three years.[19-20] However, whatever the duration of effect beyond the trial, and even when a 25-year model was used, the policy conclusions remain the same.

Finally, our model uses a regression analysis approach so that a UK specific estimate can be drawn from the complete multinational EUROACTION dataset on net resource use, costs and net effects of the intervention. The epidemiological, utilities and cost data for the longer-term modelling of risk and events is based on UK data alone. Thus, the results are applicable to the UK and not specifically to the other EUROACTION countries. Whilst formal

1  
2 analysis would be needed to confirm this, the coefficients on the country parameters in the  
3 regression analyses of both costs and outcomes suggest that the cost-effectiveness would  
4 be broadly similar in the other countries.  
5  
6  
7  
8  
9

## 10 **Conclusion**

11 Although the EUROACTION study demonstrated in high risk patients in primary care  
12 significant improvements in lifestyle and CVD risk factors, it is not possible to show, using  
13 the best available risk equations, that the intervention was cost-effective. The available risk  
14 modelling is based on a limited number of risk factors, which do not include diet or physical  
15 activity, and a healthier lifestyle was the most important outcome of this trial. Therefore,  
16 whether or not an intervention such as that offered by EUROACTION is cost-effective  
17 remains an open question that could be answered by a longer term trial with major adverse  
18 cardiovascular events as the primary endpoint.  
19  
20  
21  
22  
23  
24  
25  
26  
27  
28  
29  
30  
31  
32  
33  
34  
35  
36  
37  
38  
39  
40  
41  
42  
43  
44  
45  
46  
47  
48  
49  
50  
51  
52  
53  
54  
55  
56  
57  
58  
59  
60



## Acknowledgements

### *EUROACTION Steering Group*

A scientific steering group approved the protocol and the design for this matched pair cluster-randomised controlled trial, and is responsible for the scientific integrity of the study.

The steering group has the following membership: D Wood (London, UK, Chairman), G De Backer (Ghent, Belgium), D De Bacquer (Ghent, Belgium), M Buxton (Uxbridge, UK), I Graham (Dublin, Ireland), A Howard (Nice, France), K Kotseva (London, UK), S Logstrup (Brussels, Belgium), H McGee (Dublin, Ireland), M Mioulet (Nice, France), K Smith (Dundee, UK), D Thompson (York, UK), T Thomsen (Glostrup, Denmark), T van der Weijden (Maastricht, the Netherlands).

### *National co-ordinators*

The national co-ordinators for each country are also members of the steering committee.

They are responsible for identifying and recruiting general practices, obtaining ethics committee approval, appointing and supervising staff in the centres and contributing scientifically to the publication of results. The EUROACTION National Co-ordinators and Primary care leaders are as follows:

Denmark: T Thomsen, K Brockelmann; Italy: P Fioretti, A Desideri, S Brusaferrò; Poland: A Pajak, K. Kawecka-Jaszcz, P Jankowski, T Grodzicki; Spain: J De Velasco, A Maiques; Netherlands: T van der Weijden; United Kingdom: D Wood, J Morrell.

### *Co-ordinating and Data Management Centre*

The Co-ordinating and Data Management Centre is the Department of Cardiovascular Medicine, National Heart and Lung Institute at Charing Cross Campus, Imperial College, London, UK (Head Professor David Wood). The following staff have specific responsibilities as described: K Kotseva, Senior Clinical Research Fellow; S Connolly, Research Fellow; C Jennings, Study Nurse Co-ordinator; A Mead, Chief Dietician; J Jones, Superintendent

1  
2  
3  
4  
5  
6  
7  
8  
9  
10  
11  
12  
13  
14  
15  
16  
17  
18  
19  
20  
21  
22  
23  
24  
25  
26  
27  
28  
29  
30  
31  
32  
33  
34  
35  
36  
37  
38  
39  
40  
41  
42  
43  
44  
45  
46  
47  
48  
49  
50  
51  
52  
53  
54  
55  
56  
57  
58  
59  
60

Physiotherapist; A Holden, Physical activity Co-ordinator; T Collier, Statistician; M Alston, D Charlesworth, P Homewood, K Pandya, M Somaia, IT specialists/Data managers; S Graves, Research Administrator; W Leacock, D Xenikaki, Administrative Assistants. The following experts advised the Co-ordinating Centre on dietary and physical activity assessment: Professor Gary Frost, Professor Barry Margetts, Dr Mike Nelson and Dr Charlie Foster.

#### *Central Laboratory*

Central Laboratory analysis of total cholesterol, HDL cholesterol, triglycerides, glucose and HbA1c are undertaken by A McLelland, R Birrell and G Beastall in the Department of Pathological Biochemistry, Royal Infirmary, Glasgow (Head of Department J Shepherd).

#### *Statistical Centres*

The statistical analyses for the primary endpoints were undertaken by D De Bacquer, Statistician, from the Department of Public Health (Head of Department G De Backer), Ghent University, Belgium, and supplementary analyses by T Collier, Statistician, Department of Medical Statistics, London School of Hygiene and Tropical Medicine, University of London, UK.

#### *Health Economics Centre*

Martin J Buxton, Professor of Health Economics and Director: Health Economics Research Group, Brunel University, UK; Hema Mistry and Matthew Dyer, Research Fellows in Health Economics, Brunel University.

#### *Primary Care Centres*

##### *Denmark*

Intervention Centre: Sundhedscenteret Skanderborg. Dr Lisbeth Rosborg, GP/ Practice Manager; Susanne Holck Mogensen, Nurse.

Usual Care Centre: Gasvej 5, 8700 Horsens. Dr Henrik Zanoni, GP; Lene Henriksen, Nurse.

*Italy*

Intervention Centre: Rive dai Stimatinis 12, 33013 Gemona del Friuli. Dr Beppino Colle, Primary Care Intervention Coordinator; Dr Massimiliano Rugolo, Principal Investigator/GP; Tilla Gurisatti, Nurse.

Usual Care Centre: Via S. Valentino 20, 33100 Udine. Dr Mario Casini, Italy Usual Care Coordinator. Dr Fabrizio Gangi, Italy Usual Care PI/GP. Daniela Gurisatti and Loredana Trevisani, Nurses.

*Netherlands*

Intervention Centre: Gezondheidscentrum Hoensbroek-Noord. Dr Martijn van Nunen and Dr Bem Bruls, GPs; Jasja Janssen, Nurse; Mrs Mathil Sanders, Practice Manager.

Usual Care Centre: Dr Mieke Winten-Huisman and Dr Marc Eyck, GPs; Rene van den Heuvel and Claudia Gessing, Nurses.

*Poland*

Intervention Centre: Centrum Medycyny Profilaktycznej w Krakowie. Dr Krystyna Pająk, Principal Investigator; Lidia Dwojak, Practice Manager; Joanna Śladek-Ratajewicz, GP; Barbara Waligóra and Irena Smarzyńska, Nurses.

Usual Care Centre: Podstawowa Opieka Zdrowotna - Szpital Uniwersytecki w Krakowie. Dr Maria Fornal, Principal Investigator; Dr Jolanta Walczewska, GP; Barbara Wojtanis and Helena Kamińska, Nurses.

*Spain*

Intervention Centre: Centro de Salud Salvador Pau, Valencia. Dr Jorge Navarro, Principal Investigator; Gemma Méndez Pérez, Nurse; Dr. Maria Jose Donat, Dr. Raquel Prieto, Dr. Rosario Gonzalez, Dr. Teresa Almela, Dr. Amaparo Garcia and Dr. Francisco Cortes, GPs.

1  
2 Usual Care Centre: Centro de Salud de Manises, Valencia. Dr Lorenzo Pascual, Principal  
3 Investigador; Rocio Marco, Nurse; Dr Juan Manuel García, Practice Manager; Dr Antonia  
4 Ibañez, Dr. Cecilia Ruiz, Dr. Santos Plaza, Dr. Amparo Moreno and Dr. Carmen Lloret, GPs.  
5  
6  
7  
8  
9

10 *UK*

11  
12 Intervention Centre: Seaside Medical Centre, Eastbourne. Dr Tim Gietzen, Principal  
13 Investigator; Sjouke Ashton, Nurse; George Bordoli, Associate Nurse; Daniel Brookbank and  
14 Angela Hughes, Practice Managers.  
15  
16

17  
18 Usual Care Centre: Green Street Clinic, Eastbourne. Dr Ian McNaughton, Principal  
19 Investigator; Shirley Colvin, Nurse; Heather King, Practice Manager.  
20  
21  
22  
23

24  
25 *Acknowledgement:* EUROACTION is an initiative of the European Society of Cardiology  
26 which highlights its commitment to improve the quality of life of the European population by  
27 reducing the impact of cardiovascular diseases. The study protocol conforms to the ethical  
28 guidelines of the 1995 Declaration of Helsinki with ethics committee approval in all countries  
29 and for every centre. Written informed consent was obtained from every subject.  
30  
31  
32  
33

34 *Competing interest statement:* All authors declare that the answer to the questions on your  
35 competing interest form [bmj.com/cgi/content/full/317/7154/291/DC1](http://bmj.com/cgi/content/full/317/7154/291/DC1) are all No and therefore  
36 have nothing to declare.  
37  
38  
39

40 *Funding:* Sponsored solely by AstraZeneca through the provision of an unconditional  
41 educational grant.  
42  
43  
44

45 *Author contributions:* DW and MB are part of the steering committee and approved the  
46 protocol and the design for this matched paired cluster-randomised trial. DW was  
47 responsible for the overall direction of the project. HM and MD conducted the economic  
48 analysis under the supervision of SM and MB and with guidance from DW. KK was  
49 responsible for local data collection. HM drafted the manuscript with input from all authors;  
50 all authors have approved the final manuscript and were involved in the interpretation of the  
51 results.  
52  
53  
54  
55  
56  
57  
58  
59  
60

Table 1: Observed 1-year costs for EUROACTION study (in £ GBP)

| 2006/2007 prices    | Denmark        | Italy          | Netherlands    | Poland         | Spain          | UK             | Total          |
|---------------------|----------------|----------------|----------------|----------------|----------------|----------------|----------------|
| <b>Intervention</b> |                |                |                |                |                |                |                |
| N                   | 104            | 165            | 191            | 234            | 199            | 126            | 1,019          |
| Mean (SD)           | £589 (£379)    | £595 (£366)    | £756 (£466)    | £515 (£179)    | £588 (£269)    | £625 (£181)    | £608 (£329)    |
| Median              | £541           | £562           | £704           | £463           | £550           | £594           | £560           |
| IQR                 | £473 to £614   | £451 to £680   | £546 to £862   | £374 to £616   | £420 to £714   | £530 to £729   | £449 to £714   |
| Range               | £268 to £4,054 | £179 to £3,733 | £166 to £5,064 | £282 to £1,578 | £139 to £1,669 | £163 to £1,206 | £139 to £5,064 |
| <b>Usual Care</b>   |                |                |                |                |                |                |                |
| N                   | 154            | 194            | 123            | 160            | 193            | 181            | 1,005          |
| Mean (SD)           | £295 (£490)    | £201 (£365)    | £246 (£307)    | £159 (£167)    | £138 (£207)    | £307 (£563)    | £221 (£384)    |
| Median              | £193           | £146           | £125           | £105           | £68            | £196           | £142           |
| IQR                 | £152 to £275   | £104 to £198   | £84 to £250    | £84 to £159    | £56 to £122    | £140 to £303   | £90 to £225    |
| Range               | £98 to £3,364  | £70 to £4,455  | £65 to £2,806  | £60 to £1,255  | £40 to £2,173  | £73 to £6,500  | £40 to £6,500  |

Table 2: Results from cost-effectiveness model

|                                   | Duration of effect of intervention beyond the end of the trial (model time horizon = 11* years in all cases) |                          |                          |                          |
|-----------------------------------|--------------------------------------------------------------------------------------------------------------|--------------------------|--------------------------|--------------------------|
|                                   | 0 years                                                                                                      | 2 years                  | 5 years                  | 10 years                 |
| <b>Unadjusted costs and QALYs</b> |                                                                                                              |                          |                          |                          |
| Usual care mean cost (SD)         | £2,727 (£29)                                                                                                 | £2,727 (£29)             | £2,727 (£29)             | £2,727 (£29)             |
| Intervention mean cost (SD)       | £3,146 (£33)                                                                                                 | £3,126 (£31)             | £3,105 (£31)             | £3,089 (£31)             |
| Usual care mean QALYs (SD)        | 6.755 (0.021)                                                                                                | 6.755 (0.021)            | 6.755 (0.021)            | 6.755 (0.021)            |
| Intervention mean QALYs (SD)      | 6.831 (0.021)                                                                                                | 6.835 (0.021)            | 6.838 (0.021)            | 6.840 (0.021)            |
| Incremental costs (95% CI)        | £419 (£332 to £505)                                                                                          | £399 (£315 to £483)      | £378 (£294 to £462)      | £362 (£278 to £447)      |
| Incremental QALYs (95% CI)        | 0.076 (0.017 to 0.135)                                                                                       | 0.079 (0.020 to 0.138)   | 0.083 (0.024 to 0.142)   | 0.085 (0.026 to 0.144)   |
| ICER                              | £5,539                                                                                                       | £5,031                   | £4,561                   | £4,266                   |
| 95% CI                            | £2,625 to £29,627                                                                                            | £2,412 to £22,520        | £2,202 to £18,155        | £2,059 to £15,945        |
| % of bootstrapped ICERs < £20k    | 95.7%                                                                                                        | 97.0%                    | 97.9%                    | 98.4%                    |
| % of bootstrapped ICERs < £30k    | 97.6%                                                                                                        | 98.4%                    | 99.0%                    | 99.2%                    |
| <b>Adjusted costs and QALYs†</b>  |                                                                                                              |                          |                          |                          |
| Incremental costs (95% CI)        | £474 (£368 to £580)                                                                                          | £463 (£358 to £568)      | £450 (£343 to £557)      | £441 (£331 to £550)      |
| Incremental QALYs (95% CI)        | -0.009 (-0.041 to 0.023)                                                                                     | -0.007 (-0.038 to 0.025) | -0.005 (-0.036 to 0.027) | -0.003 (-0.035 to 0.029) |
| ICER                              | Dominated†                                                                                                   | Dominated†               | Dominated†               | Dominated†               |
| 95% CI                            | £21,695 to dominated†                                                                                        | £18,495 to dominated†    | £15,908 to dominated†    | £14,485 to dominated†    |

|                               |       |       |       |        |
|-------------------------------|-------|-------|-------|--------|
| % of bootstrapped ICERs <£20k | 1.97% | 3.16% | 4.57% | 5.76%  |
| % of bootstrapped ICERs <£30k | 5.05% | 6.98% | 9.42% | 11.54% |

SD = standard deviation; QALYs = quality-adjusted life years; ICER = incremental cost-effectiveness ratio; CI = confidence interval

# 1 year study follow-up period plus a 10 year model

† The intervention is more costly and yield fewer QALYs than usual care

‡ Adjusting for the following baseline characteristics: age, gender, age\*gender, country, total and HDL cholesterol, SBP, anti-hypertensive medications, smoking and diabetes.

Figure 1: Cost-effectiveness acceptability curves

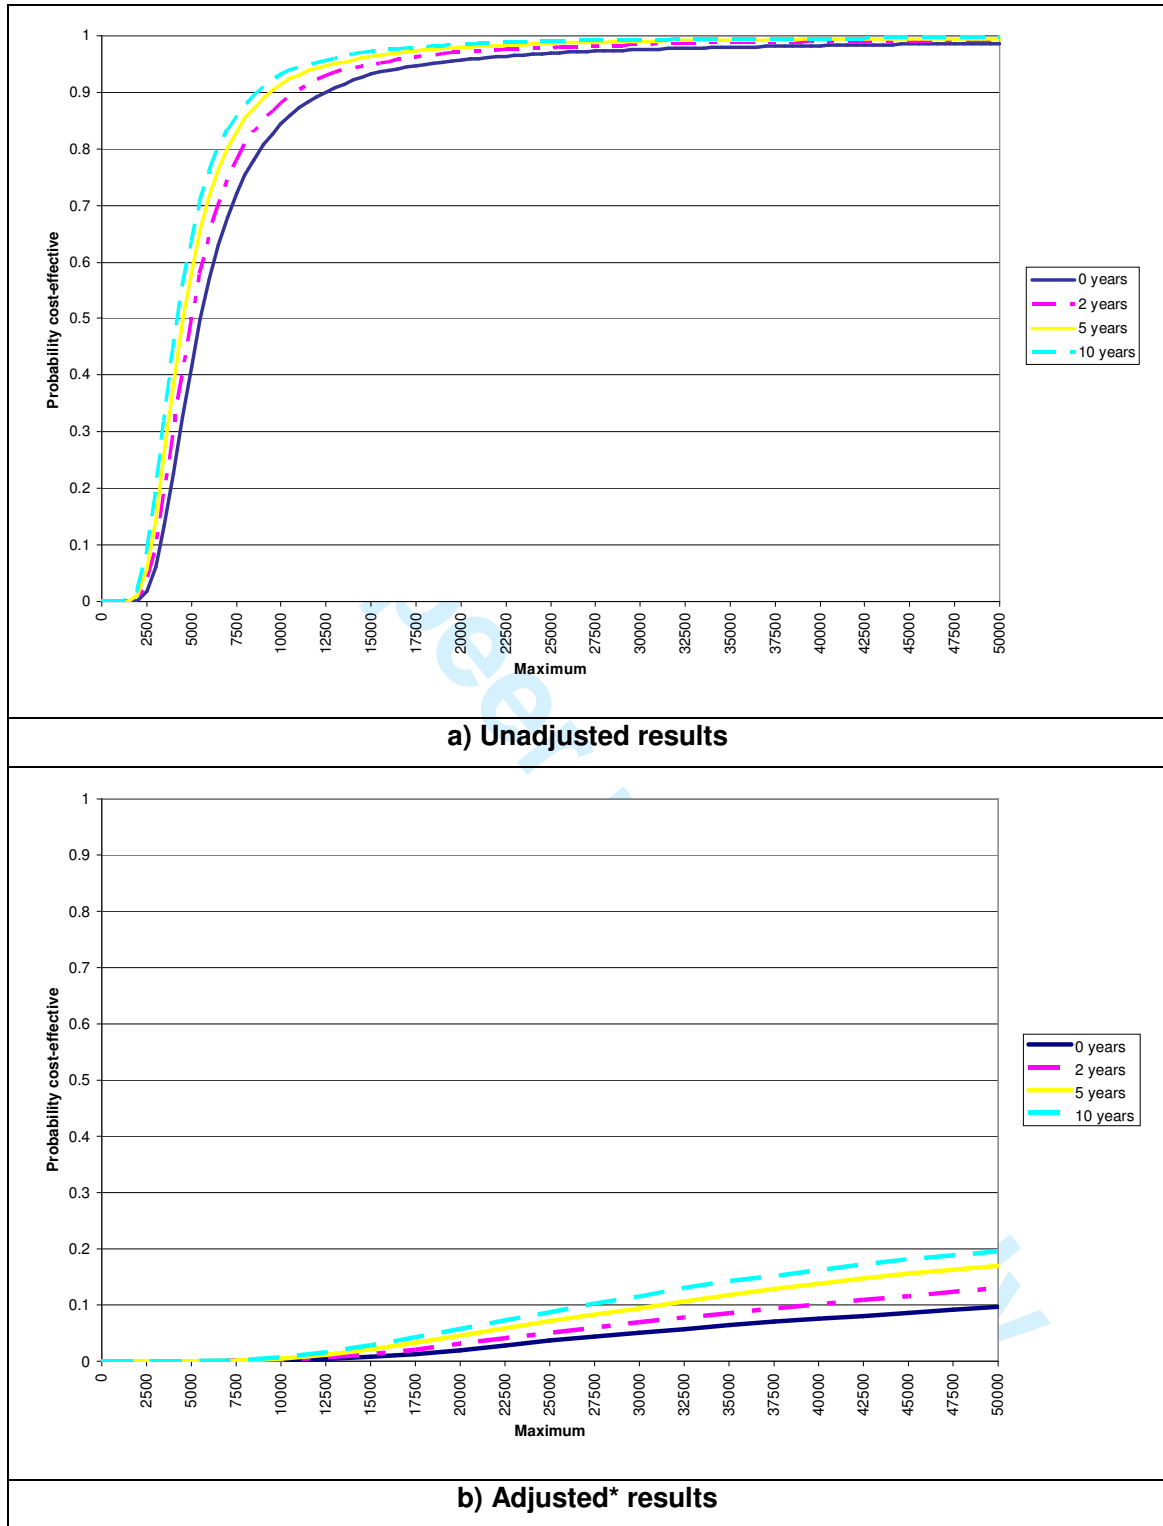

\* Adjusted for differences between groups by age, gender, country and baseline risk factors



## References

1. Graham I, Atar D, Borch-Johnsen K, et al. European guidelines on cardiovascular disease prevention in clinical practice: executive summary. Fourth Joint Task Force of the European Society of Cardiology and Other Societies on Cardiovascular Disease Prevention in Clinical Practice (Constituted by representatives of nine societies and by invited experts). *Eur Heart J* 2007;28:2375-2414.
2. Kotseva K, Wood D, De Backer G, De Bacquer D, Pyörälä K, Reiner Z, Keil U, on behalf of the EUROASPIRE Study Group. EUROASPIRE III. Management of cardiovascular risk factors in asymptomatic high-risk patients in general practice: cross-sectional survey in 12 European countries. *Eur J Cardiovasc Prev Rehabil* 2010;17:530-540.
3. Wood DA, Kotseva K, Jennings C, et al on behalf of the EUROACTION Study Group. EUROACTION: A European Society of Cardiology demonstration project in preventive cardiology. *Eur Heart J* 2004;6(Supplement J):J3-J15.
4. Wood DA, Kotseva K, Connolly S, et al. Nurse-coordinated multidisciplinary, family-based cardiovascular disease prevention programme (EUROACTION) for patients with coronary heart disease and asymptomatic individuals at high risk of cardiovascular disease: a paired, cluster-randomised controlled trial. *Lancet* 2008;371:1999-2012.
5. D'Agostino RB, Vasan RS, Pencina MJ et al. General cardiovascular risk profile for use in primary care. The Framingham Heart Study. *Circulation* 2008;117:743-53.
6. Miller DK, Homan SM. Determining transition probabilities: confusion and suggestion. *Med Decis Making* 1994;14:52-8.

- 1  
2  
3  
4  
5  
6  
7  
8  
9  
10  
11  
12  
13  
14  
15  
16  
17  
18  
19  
20  
21  
22  
23  
24  
25  
26  
27  
28  
29  
30  
31  
32  
33  
34  
35  
36  
37  
38  
39  
40  
41  
42  
43  
44  
45  
46  
47  
48  
49  
50  
51  
52  
53  
54  
55  
56  
57  
58  
59  
60
7. Sutcliffe SJ, Fox KF, Wood DA, et al. Incidence of coronary heart disease in a health authority in London: review of a community register. *BMJ* 2003;326:20.
8. Bamford J, Sandercock P, Dennis M, et al. A prospective study of acute cerebrovascular disease in the community: the Oxfordshire Community Stroke Project 1981–86. I. Methodology, demography and incident cases of first-ever stroke. *J Neurol Neurosurg Psychiatry* 1988;51:1373–80.
9. Dennis MS, Bamford JM, Sandercock PA, Warlow CP. Incidence of transient ischemic attacks in Oxfordshire, England. *Stroke* 1989;20:333–9.
10. Ward S, Lloyd Jones M, Pandor A, et al. A systematic review and economic evaluation of statins for the prevention of coronary events. *Health Technology Assessment* 2007;11(14).
11. Briggs A, Mihaylova B, Sculpher M, et al. Cost-effectiveness of perindopril in reducing cardiovascular events in patients with stable coronary artery disease using data from the EUROPA study. *Heart* 2007;93:1081-6.
12. Organisation for Economic Co-operation and Development (OECD CPI). OECD Consumer Price Indices. July 2007. Available at: <http://www.oecd.org/>
13. Kind P, Dolan P, Gudex C, Williams A. Variations in population health status: results from a United Kingdom national questionnaire survey. *BMJ* 1998;316:736–41.
14. National Institute for Health and Clinical Excellence (NICE). Guide to methods of technology appraisal. London, June 2008.
15. StataCorp. Stata Statistical Software: Release 10.0. College Station, Texas, USA: Stata Corporation, 2007.

- 1  
2  
3  
4 16. Ridker PM, Buring JE, Rifai N, Cook NR. Development and validation of improved algorithms  
5  
6 for the assessment of global cardiovascular risk in women: the Reynolds Risk Score. *JAMA*  
7  
8 2007;297:611-9.  
9  
10  
11  
12 17. Woodward M, Brindle P, Tunstall-Pedoe H. SIGN group on risk estimation. Adding social  
13  
14 deprivation and family history to cardiovascular risk assessment: the ASSIGN score from the  
15  
16 Scottish Heart Health Extended Cohort (SHHEC). *Heart* 2007;93:172-6.  
17  
18  
19  
20 18. Yusuf S, Hawken S, Ounpuu S, et al. Effect of potentially modifiable risk factors associated  
21  
22 with myocardial infarction in 52 countries (the INTERHEART study): case-control study.  
23  
24 *Lancet* 2004;364:937-52.  
25  
26  
27  
28 19. Fleming P, Godwin M. Lifestyle interventions in primary care: systematic review of  
29  
30 randomized controlled trials. *Can Fam Physician* 2008;54:1706-13  
31  
32  
33  
34 20. Imperial Cancer Research Fund OXCHECK Study Group. Effectiveness of health checks  
35  
36 conducted by nurses in primary care: final results of the OXCHECK study. *BMJ*  
37  
38 1995;310:1099-1104  
39  
40  
41  
42  
43  
44  
45  
46  
47  
48  
49  
50  
51  
52  
53  
54  
55  
56  
57  
58  
59  
60

**Appendix**  
**Table A1: Costs of health states in cost-effectiveness model**

| Health State         | Cost (2006 prices) | Assumption/Source                                                                                                                                                                               | Source                     |
|----------------------|--------------------|-------------------------------------------------------------------------------------------------------------------------------------------------------------------------------------------------|----------------------------|
| Event-Free           | £197               | Based on a mean cost of cardiac-related medication and health care contacts (outside of EUROACTION programme) incurred by all patients during one year follow-up                                | Trial data                 |
| Stable Angina        | £383               | Based on 3 times 15 minutes' GP contact plus medication (plus cost of event-free)                                                                                                               | Ward et al, 2007<br>[10]   |
| Post-stable angina   | £383               | Based on 3 times 15 minutes' GP contact plus medication costs (plus cost of event-free)                                                                                                         | Ward et al, 2007<br>[10]   |
| Unstable angina      | £674               | Based on 3 times 15 minutes' GP contact plus medication plus 60% of patients are also prescribed clopidogrel (plus cost of event-free)                                                          | Ward et al, 2007<br>[10]   |
| Post-unstable angina | £383               | Based on 3 times 15 minutes' GP contact plus medication costs (plus cost of event-free)                                                                                                         | Ward et al, 2007<br>[10]   |
| MI                   | £5,020             | Based on data from Nottingham Heart Attack Register include revascularisation for a proportion of patients, plus primary care and medication costs as unstable angina (plus cost of event-free) | Palmer et al, 2002 [21]    |
| Post-MI              | £383               | Based on 3 times 15 minutes' GP contact plus medication costs (plus cost of event-free)                                                                                                         | Ward et al, 2007<br>[10]   |
| Fatal CHD event      | £1,462             | Based on costs of a fatal MI (plus cost of event-free)                                                                                                                                          | Clarke et al, 2003<br>[22] |
| TIA                  | £1,351             | Based on medication costs plus costs of test and surgery for appropriate patients (plus cost of event-free)                                                                                     | Ward et al, 2007<br>[10]   |
| Post-TIA             | £483               | Based on medication costs only (plus cost of event-free)                                                                                                                                        | Ward et al, 2007<br>[10]   |

|                 |        |                                                                                                                                                |                         |
|-----------------|--------|------------------------------------------------------------------------------------------------------------------------------------------------|-------------------------|
| Stroke          | £8,922 | Based on cost of acute events (mild, moderate and severe stroke) and weighted by distribution of severity of strokes (plus cost of event-free) | Youman et al, 2003 [23] |
| Post-Stroke     | £2,543 | Based on cost of acute events (mild, moderate and severe stroke) and weighted by distribution of severity of strokes (plus cost of event-free) | Youman et al, 2003 [23] |
| Fatal CVD event | £7,832 | Based on cost of fatal stroke (plus cost of event-free)                                                                                        | Youman et al, 2003 [23] |

**Table A2: Utility values for health states used in the model**

| Utility value | Event free | Stable angina | Unstable angina | MI    | TIA   | Stroke |
|---------------|------------|---------------|-----------------|-------|-------|--------|
| 45 - 49       | 0.869      | 0.702         | 0.669           | 0.660 | 0.869 | 0.547  |
| 50 - 54       | 0.848      | 0.685         | 0.653           | 0.644 | 0.848 | 0.533  |
| 55 - 59       | 0.826      | 0.667         | 0.636           | 0.628 | 0.826 | 0.520  |
| 60 - 64       | 0.805      | 0.650         | 0.620           | 0.612 | 0.805 | 0.506  |
| 65 - 69       | 0.784      | 0.633         | 0.604           | 0.596 | 0.784 | 0.493  |
| 70 - 74       | 0.763      | 0.617         | 0.588           | 0.580 | 0.763 | 0.480  |
| 75 - 79       | 0.741      | 0.599         | 0.571           | 0.563 | 0.741 | 0.466  |
| 80 - 84       | 0.720      | 0.582         | 0.544           | 0.547 | 0.720 | 0.453  |
| 85 - 89       | 0.699      | 0.565         | 0.538           | 0.531 | 0.699 | 0.440  |
| 90 - 94       | 0.678      | 0.548         | 0.522           | 0.515 | 0.678 | 0.426  |
| 95 - 99       | 0.656      | 0.530         | 0.505           | 0.499 | 0.656 | 0.413  |
| 100 +         | 0.635      | 0.513         | 0.489           | 0.483 | 0.635 | 0.399  |

Sources: Event free (Kind et al, 1998) [13]; Stable angina (Meslop et al, 2003) [24]; Unstable angina and MI (Goodacre et al, 2004) [25]; TIA (Kind et al, 1998) [13]; Stroke (Tengs et al, 2003) [26]

Table A3: Additional results from the cost-effectiveness model

|                                                       | Duration of effect of intervention beyond the end of the trial (model time horizon = 11 <sup>#</sup> years in all cases) |                          |                          |                          |
|-------------------------------------------------------|--------------------------------------------------------------------------------------------------------------------------|--------------------------|--------------------------|--------------------------|
|                                                       | 0 years                                                                                                                  | 2 years                  | 5 years                  | 10 years                 |
| <b>Adjusted costs and QALYs</b>                       |                                                                                                                          |                          |                          |                          |
| <b><i>Controlling for age and gender only</i></b>     |                                                                                                                          |                          |                          |                          |
| Incremental costs (95% CI)                            | £512 (£438 to £589)                                                                                                      | £491 (£418 to £563)      | £468 (£396 to £541)      | £452 (£378 to £525)      |
| Incremental QALYs (95% CI)                            | -0.016 (-0.036 to 0.004)                                                                                                 | -0.012 (-0.032 to 0.008) | -0.008 (-0.028 to 0.012) | -0.006 (-0.026 to 0.014) |
| ICER                                                  | Dominated†                                                                                                               | Dominated†               | Dominated†               | Dominated†               |
| 95% CI                                                | £105,653 to dominated†                                                                                                   | £54,307 to dominated†    | £34,845 to dominated†    | £27,907 to dominated†    |
| % of bootstrapped ICERs <£20k                         | 0.01%                                                                                                                    | 0.10%                    | 0.34%                    | 0.71%                    |
| % of bootstrapped ICERs <£30k                         | 0.19%                                                                                                                    | 0.52%                    | 1.69%                    | 3.11%                    |
| <b><i>Controlling for age, gender and country</i></b> |                                                                                                                          |                          |                          |                          |
| Incremental costs (95% CI)                            | £497 (£424 to £571)                                                                                                      | £476 (£404 to £548)      | £453 (£381 to £526)      | £436 (£364 to £509)      |
| Incremental QALYs (95% CI)                            | -0.011 (-0.031 to 0.009)                                                                                                 | -0.007 (-0.027 to 0.013) | -0.003 (-0.023 to 0.017) | -0.001 (-0.021 to 0.019) |
| ICER                                                  | Dominated†                                                                                                               | Dominated†               | Dominated†               | Dominated†               |
| 95% CI                                                | £49,903 to dominated†                                                                                                    | £33,290 to dominated†    | £24,001 to dominated†    | £20,342 to dominated†    |
| % of bootstrapped ICERs <£20k                         | 0.07%                                                                                                                    | 0.34%                    | 1.11%                    | 2.32%                    |
| % of bootstrapped ICERs <£30k                         | 0.61%                                                                                                                    | 1.81%                    | 4.78%                    | 7.76%                    |

SD = standard deviation; QALYs = quality-adjusted life years; ICER = incremental cost-effectiveness ratio; CI = confidence interval

<sup>#</sup> 1 year study follow-up period plus a 10 year model

† The intervention is more costly and yield fewer QALYs than usual care

1  
2  
3  
4  
5  
6  
7  
8  
9  
10  
11  
12  
13  
14  
15  
16  
17  
18  
19  
20  
21  
22  
23  
24  
25  
26  
27  
28  
29  
30  
31  
32  
33  
34  
35  
36  
37  
38  
39  
40  
41  
42  
43  
44  
45  
46  
47  
48  
49  
50  
51  
52  
53  
54  
55  
56  
57  
58  
59  
60

Figure A1: Adjusted cost-effectiveness results

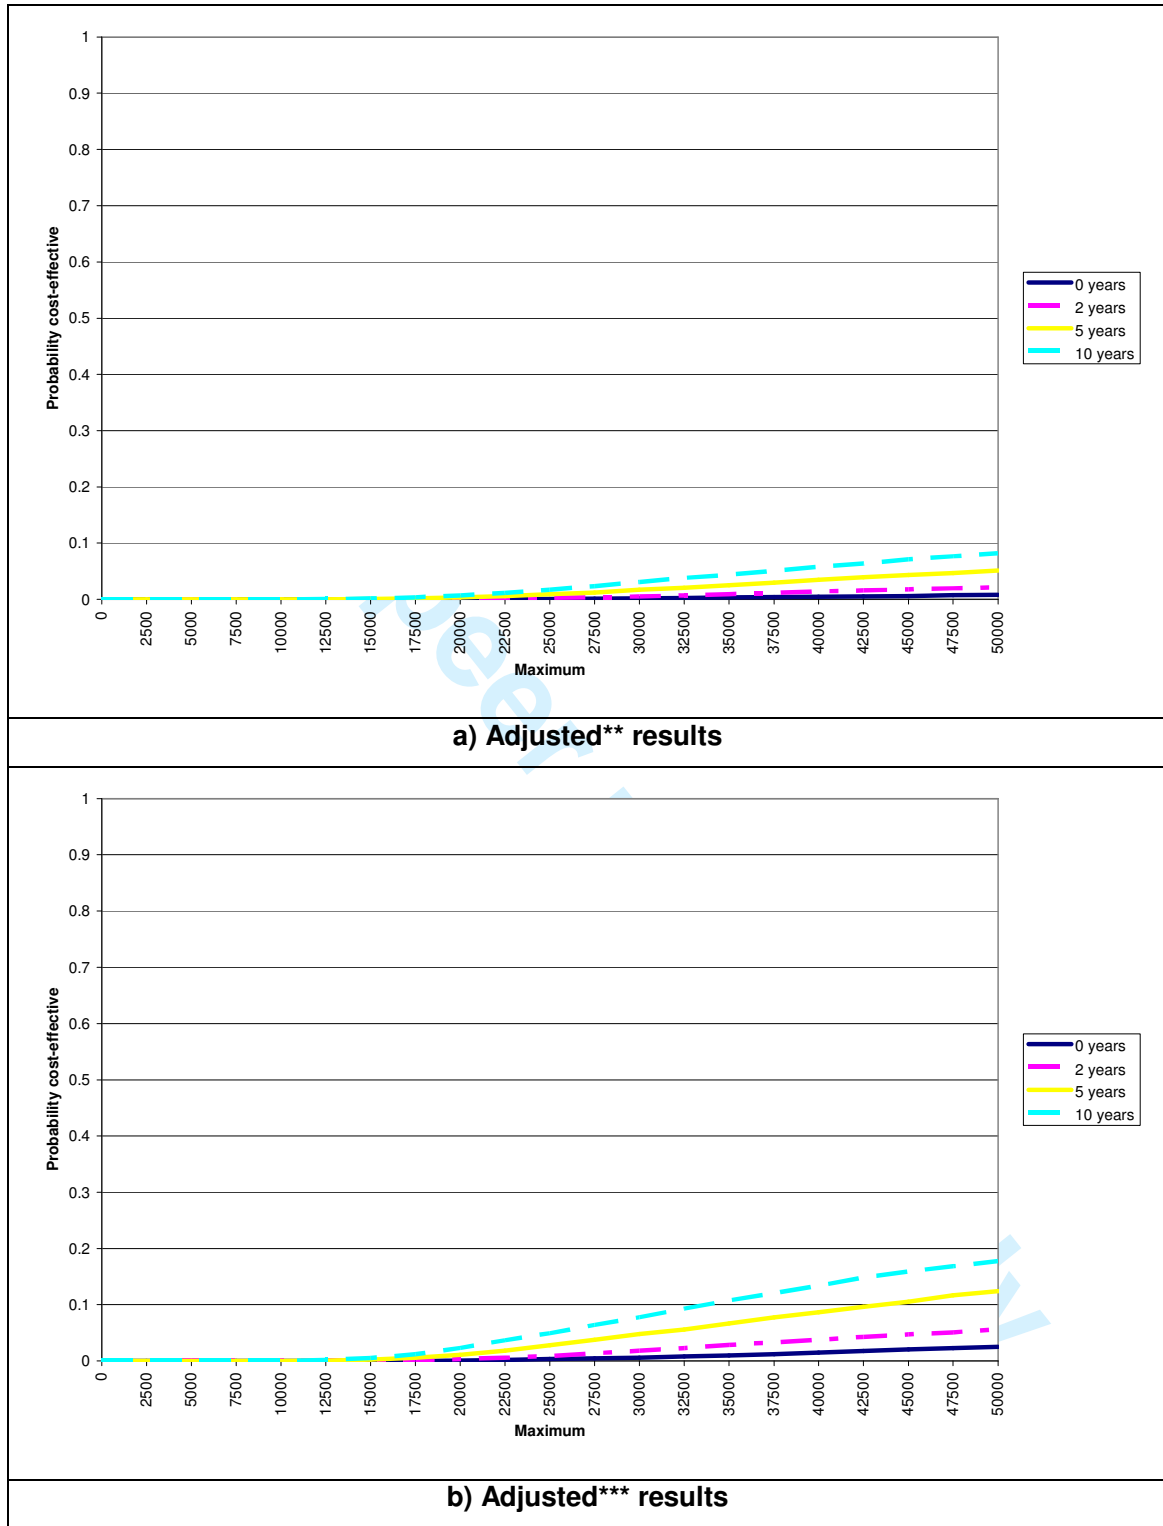

\*\* Adjusted for differences between groups by age and gender

\*\*\* Adjusted for differences between groups by age, gender and country



**Additional References for Appendix**

- 1  
2  
3  
4 21. Palmer S, Sculpher M, Philips Z, et al. A cost-effectiveness model comparing alternative  
5 management strategies for the use of glycoprotein IIb/IIIa antagonists in non-ST-elevation  
6 acute coronary syndrome. Report to the National Institute for Health and Clinical Excellence.  
7  
8 <http://www.nice.org.uk/Docref.asp?d=32030>. London: NICE; 2002.  
9  
10  
11  
12  
13  
14 22. Clarke P, Gray A, Legood R, Briggs A, Holman R. The impact of diabetes-related  
15 complications on healthcare costs: results from the United Kingdom Prospective Diabetes  
16 Study (UKPDS Study No. 65). *Diabet Med* 2003;20:442–50.  
17  
18  
19  
20  
21  
22 23. Youman P, Wilson K, Harraf F, Kalra L. The economic burden of stroke in the United  
23 Kingdom. *Pharmacoeconomics* 2003;21(Suppl 1):43–50.  
24  
25  
26  
27  
28 24. Meslop K, Boothroyd DB, Hlatky MA. Quality of life and time trade-off utility measures in  
29 patients with coronary artery disease. *Am Heart J* 2003;145:36–41.  
30  
31  
32  
33  
34 25. Goodacre S, Nicholl J, Dixon S, et al. Randomised controlled trial and economic evaluation of  
35 a chest pain observation unit compared with routine care. *BMJ* 2004;328:254.  
36  
37  
38  
39  
40 26. Tengs TO, Lin TH. A meta-analysis of quality of life estimates for stroke. *Pharmacoeconomics*  
41 2003;21:191–200.  
42  
43  
44  
45  
46  
47  
48  
49  
50  
51  
52  
53  
54  
55  
56  
57  
58  
59  
60

**Cost-effectiveness of a European preventive cardiology programme in primary care**

Hema Mistry, Stephen Morris, Matthew Dyer, Kornelia Kotseva, David Wood, Martin Buxton  
and on behalf of the EUROACTION study group

**Health economics checklist**

| Requirement                                                                                       | Manuscript page |
|---------------------------------------------------------------------------------------------------|-----------------|
| <b>Study design</b>                                                                               |                 |
| (1) The research question is stated                                                               | 2, 4            |
| (2) The economic importance of the research question is stated                                    | 2, 4            |
| (3) The viewpoint(s) of the analysis are clearly stated and justified                             | 2,5             |
| (4) The rationale for choosing the alternative programmes or interventions compared is stated     | 4               |
| (5) The alternatives being compared are clearly described                                         | 5               |
| (6) The form of economic evaluation used is stated                                                | 4,9             |
| (7) The choice of form of economic evaluation is justified in relation to the questions addressed | 9               |
| <b>Data collection</b>                                                                            |                 |
| (8) The source(s) of effectiveness estimates used are stated                                      | 9               |
| (9) Details of the design and results of effectiveness study are given                            | 9, 11           |
| (10) Method of synthesis/meta-analysis of estimates are given                                     | NA              |
| (11) The primary outcome measure(s) for the economic evaluation are clearly stated                | 2, 9            |
| (12) Methods to value health states and other benefits are stated                                 | 9               |
| (13) Details of the subjects from whom valuations were obtained are given                         | 9               |
| (14) Productivity changes (if included) are reported separately                                   | NA              |
| (15) The relevance of productivity changes to question is discussed                               | NA              |
| (16) Quantities of resources are reported separately from their unit costs                        | 7-9,<br>26-27   |
| (17) Methods for the estimation of quantities and unit costs are described                        | 7-9             |
| (18) Currency and price data are recorded                                                         | 8               |
| (19) Details of currency of price adjustments for inflation or currency conversion are given      | 8               |
| (20) Details of any model used are given                                                          | 5-10            |
| (21) The choice of model used and the key parameters are justified                                | 5-10            |
| <b>Analysis and interpretation of results</b>                                                     |                 |
| (22) Time horizon of costs and benefits is stated                                                 | 9               |
| (23) The discount rate(s) is stated                                                               | 9               |
| (24) The choice of rate(s) is justified                                                           | 9               |
| (25) An explanation is given if costs or benefits are not discounted                              | NA              |
| (26) Details of statistical tests and confidence intervals are given for stochastic data          | 9-10            |
| (27) The approach to sensitivity analysis is given                                                | 10              |
| (28) The choice of variables for sensitivity analysis is justified                                | 10              |
| (29) The ranges over which the variables are varied are stated                                    | 10              |
| (30) Relevant alternatives are compared                                                           | 11-12           |
| (31) Incremental analysis is reported                                                             | 11-12           |
| (32) Major outcomes are presented in a disaggregated as well as aggregated form                   | 11-12,<br>20-21 |
| (33) The answer to the study question is given                                                    | 12, 14          |
| (34) Conclusions follow from the data reported                                                    | 12-14           |
| (35) Conclusions are accompanied by the appropriate caveats                                       | 12-14           |



**Cost-effectiveness of a European preventive cardiology programme in primary care: A Markov Modelling Approach**

|                                 |                                                                                                                                                                                                                                                                                                                                                                                                                                                                    |
|---------------------------------|--------------------------------------------------------------------------------------------------------------------------------------------------------------------------------------------------------------------------------------------------------------------------------------------------------------------------------------------------------------------------------------------------------------------------------------------------------------------|
| Journal:                        | <i>BMJ Open</i>                                                                                                                                                                                                                                                                                                                                                                                                                                                    |
| Manuscript ID:                  | bmjopen-2012-001029.R1                                                                                                                                                                                                                                                                                                                                                                                                                                             |
| Article Type:                   | Research                                                                                                                                                                                                                                                                                                                                                                                                                                                           |
| Date Submitted by the Author:   | 06-Jun-2012                                                                                                                                                                                                                                                                                                                                                                                                                                                        |
| Complete List of Authors:       | Mistry, Hema; University of Birmingham, Health Economics Unit<br>Morris, Stephen; University College London, Department of Applied Health Research<br>Dyer, Matthew; National Institute for Health and Clinical Excellence, Kotseva, Kornelia; Imperial College London, Department of Cardiovascular Medicine<br>Wood, David; Imperial College London, Department of Cardiovascular Medicine<br>Buxton, Martin; Brunel University, Health Economics Research Group |
| <b>Primary Subject Heading</b>: | Health economics                                                                                                                                                                                                                                                                                                                                                                                                                                                   |
| Secondary Subject Heading:      | Cardiovascular medicine                                                                                                                                                                                                                                                                                                                                                                                                                                            |
| Keywords:                       | HEALTH ECONOMICS, CARDIOLOGY, PRIMARY CARE                                                                                                                                                                                                                                                                                                                                                                                                                         |
|                                 |                                                                                                                                                                                                                                                                                                                                                                                                                                                                    |

SCHOLARONE™  
Manuscripts

1  
2  
3  
4  
5  
6  
7  
8  
9  
10  
11  
12  
13  
14  
15  
16  
17  
18  
19  
20  
21  
22  
23  
24  
25  
26

# Cost-effectiveness of a European preventive cardiology programme in primary care

Hema Mistry<sup>\*ab</sup>

Stephen Morris<sup>c</sup>

Matthew Dyer<sup>d</sup>

Kornelia Kotseva<sup>e</sup>

David Wood<sup>e</sup>

Martin Buxton<sup>a</sup>

and on behalf of the EUROACTION study group

27  
28  
29  
30  
31  
32  
33  
34  
35  
36  
37  
38  
39  
40  
41  
42  
43  
44  
45  
46  
47  
48  
49  
50  
51  
52  
53  
54  
55  
56  
57  
58  
59  
60

<sup>a</sup>Health Economics Research Group, Brunel University, Uxbridge, UB8 3PH, UK

<sup>b</sup>Health Economics Unit, University of Birmingham, Birmingham, B15 2TT, UK

<sup>c</sup>Health Care Evaluation Group, University College London, London, WC1E 6BT, UK

<sup>d</sup>Creativ-Ceutical, 29-30 Windmill Street, London, W1T 2JL, UK

<sup>e</sup>Department of Cardiovascular Medicine, International Centre for Circulatory Health,  
National Heart and Lung Institute, Imperial College London, London, W2 1LA, UK

\*Corresponding author:

Dr Hema Mistry

Research Fellow in Health Economics

Health Economics Unit

University of Birmingham

Edgbaston

Birmingham, UK, B15 2TT

Tel. +44 (0)121 414 8970

Email: [H.Mistry@bham.ac.uk](mailto:H.Mistry@bham.ac.uk)

1  
2  
3 **Abstract (word count 300)**  
4  
5

6 **Objective:** To investigate the longer-term cost-effectiveness of a nurse-coordinated  
7 preventive cardiology programme for primary prevention of cardiovascular disease  
8 compared to routine practice from a health service perspective.  
9

10  
11  
12  
13  
14 **Design:** A matched, paired cluster-randomised controlled trial.  
15  
16

17  
18  
19 **Setting:** Six pairs of general practices in six countries.  
20

21  
22  
23 **Participants:** 1,019 patients were randomised to the EUROACTION intervention  
24 programme and 1,005 patients to usual care.  
25  
26

27  
28  
29 **Outcome measures:** Evidence on health outcomes and costs were based on patient level  
30 data from the study, which had a one-year follow-up period. Future risk of cardiovascular  
31 (CVD) events was modelled, using published risk models based on patient characteristics.  
32 An individual level Markov model for each patient was used to extrapolate beyond the end of  
33 the trial, which was populated with data from published sources. We used an 11-year time  
34 horizon and investigated the impact on cost-effectiveness of varying the duration of the  
35 effect of the intervention beyond the end of the trial. Results are expressed as incremental  
36 cost per quality-adjusted life year gained.  
37  
38  
39  
40  
41  
42  
43  
44  
45

46  
47 **Results:** Unadjusted results found the intervention to be more costly and also more effective  
48 than usual care. However, after adjusting for differences in age, gender, country and  
49 baseline risk factors, the intervention was dominated by usual care, but this analysis was not  
50 able to take into account of lifestyle changes in terms of diet and physical activity.  
51  
52  
53  
54  
55  
56  
57  
58  
59  
60

1  
2  
3 **Conclusions:** Although the EUROACTION study achieved healthier lifestyle changes and  
4 improvements in management of blood pressure and lipids for patients at high risk of CVD,  
5 compared to usual care, it was not possible to show, using available risk equations which do  
6 not incorporate diet and physical activity, that the intervention reduced longer-term  
7 cardiovascular risk cost-effectively. Whether or not an intervention such as that offered by  
8 EUROACTION is cost-effective requires a longer term trial with major cardiovascular events  
9 as the outcome.  
10  
11  
12  
13  
14  
15  
16  
17  
18  
19  
20  
21  
22  
23  
24  
25  
26  
27  
28  
29  
30  
31  
32  
33  
34  
35  
36  
37  
38  
39  
40  
41  
42  
43  
44  
45  
46  
47  
48  
49  
50  
51  
52  
53  
54  
55  
56  
57  
58  
59  
60

## Article summary

### Article focus

- To investigate the longer-term cost-effectiveness of a nurse-coordinated preventive cardiology programme for primary prevention of cardiovascular disease compared to routine practice.

### Key messages

- The EUROACTION study achieved healthier lifestyle changes and improvements in management of blood pressure and lipids for patients at high risk of CVD, compared to usual care.
- The unadjusted results of the cost effectiveness analysis found the intervention to be more effective than usual care but also more costly. However, the adjusted results showed that the intervention was dominated by usual care.
- The published cardiovascular risk equations do not take account of lifestyle changes in terms of diet and physical activity and therefore may be inadequate for the evaluation of whether or not a lifestyle intervention to prevent cardiovascular disease is cost-effective.

### Strengths and limitations of the study

- This is the first study assessing the cost-effectiveness of the EUROACTION programme.
- The available cardiovascular risk modelling is based on a limited number of risk factors, which do not include measures of diet or physical activity, and a healthier lifestyle was the most important outcome of the EUROACTION trial.

**Trial Registration number:** ISRCTN 71715857

**Keywords:** Multi-centre studies; cardiovascular prevention programme; cost-effectiveness; Markov model; QALYs.

**Text word Count:** 3,064

## Introduction

Evidence has shown that individuals with increased risk of cardiovascular disease (CVD) can reduce their risk of cardiovascular morbidity and mortality by stopping smoking, changing their diet, engaging in physical activity, achieving a healthy body weight, and controlling their blood pressure, cholesterol and diabetes.[1] However, not all patients at high risk of developing CVD manage to achieve these recommended lifestyle and risk factor goals and there remains considerable potential to reduce CVD risk in these patients.[2] The EUROACTION study was designed to address the need for preventive cardiology care in everyday clinical practice.[3]

The EUROACTION study was a matched, paired cluster-randomised controlled trial, across eight countries and 24 hospitals and general practices. The project evaluated the impact of a nurse-coordinated, multidisciplinary preventive cardiology programme for coronary patients in hospital and high risk individuals in general practice. It aimed to help all these high risk patients and their families to achieve recommended lifestyle and risk factor targets for CVD prevention in everyday clinical practice over one year. The principal results concluded that the EUROACTION programme achieved healthier lifestyle changes and improvements in risk factor management for patients with coronary heart disease (CHD) and those at high risk of CVD, together with their partners, compared to usual care.[4]

While there is evidence that the EUROACTION programme is effective in terms of modifying lifestyle and some CVD risk factors, there is no evidence as to its cost-effectiveness.

Therefore, this paper aims to model the long-term cost-effectiveness of the EUROACTION programme in comparison with usual care within the primary care setting.

## Methods

### *Patients*



1  
2 The EUROACTION primary care study took place in Denmark, Italy, Netherlands, Poland,  
3 Spain and UK, where a matched pair of general practices was identified, and then  
4 randomised to either the EUROACTION programme or to usual care (UC). GPs  
5 prospectively identified the study population. The comparison was restricted to patients and  
6 did not include partners. Eligibility criteria for patients has previously been published.[4]  
7  
8  
9  
10  
11  
12

13  
14 All intervention patients were assessed at baseline and one-year. These assessments  
15 focussed on smoking habits, diet and physical activity, measurement of body mass index,  
16 blood pressure, cholesterol and glucose levels, and cardiac medications were also recorded.  
17  
18 The programme was delivered by specialist nurses, working with GPs, and supported by  
19 software programmes (HEARTSCORE), educational materials and group workshops to  
20 achieve individual goals. Each person was given a personal record card to record lifestyle  
21 and risk factor goals, medications and appointments. To avoid the possibility that  
22 undergoing baseline assessments might affect outcomes, only a random sub-sample  
23 (~25%) of UC patients were seen at baseline and then all UC patients were invited for  
24 assessment at one-year. In the UC arm, patients did not receive any form of special care.  
25  
26  
27  
28  
29  
30  
31  
32  
33  
34  
35  
36

### 37 ***Model structure***

38  
39 We adopted a health service perspective to measure costs and outcomes. Each cycle in the  
40 model is of one year's duration. All patients were CVD-free on entering the model. In each  
41 subsequent cycle patients may remain CVD-event free, they may have a fatal or non-fatal  
42 CVD event, or they may die from non-CVD causes. Once the patient has had an initial CVD  
43 event, then in subsequent cycles they move to the post CVD-event states and they may  
44 move between different CVD states and/or die from CVD or non-CVD causes.  
45  
46  
47  
48  
49  
50  
51  
52

53 The CVD event states are: non-fatal myocardial infarction (MI), stable angina, unstable  
54 angina, CHD death, transient ischaemic attack (TIA), stroke, CVD death and non-CVD  
55 death.  
56  
57  
58  
59  
60

### ***Measuring initial CVD risk***

To estimate the risk of an initial CVD event in a subsequent year we used the D'Agostino et al [5] CVD risk function, derived from the Framingham Heart Study. This calculates individual sex-specific risks for future cardiovascular events (in patients initially free of CVD). These CVD risk equations incorporate as risk factors the natural logarithms of age, total and HDL cholesterol, systolic blood pressure (SBP) if treated with or without anti-hypertensive medications, smoking and diabetes. We used the published calibration factors to focus on the CHD and stroke event states.

Ten-year risks were estimated from the equations and adjusted to one-year values.[6] One-year CVD risk beyond the end of the trial was calculated based on both a) baseline patient characteristics (adjusted for age) for intervention patients only; and b) one-year follow-up characteristics for both groups, in order to evaluate any changes to CVD risk factors as a result of the EUROACTION programme.

### ***Validating the appropriateness of the risk functions of the model***

We tested the validity of applying the D'Agostino et al [5] risk equations to the study population, by comparing the observed number of CHD cases with the number predicted at one-year. Because stroke and TIA incidence data was not collected in the study we converted the CVD risk equations to CHD risks using the recommended calibration factors.[5] We present the results of the comparison for both groups.

### ***Transition probabilities***

We disaggregated the overall risk of a CVD event into rates for specific events by age and gender, using UK relative incidence rates based on published literature [7-9] and expert opinion, as previously used in Ward et al [10]. These event rates were applied to individual annual CVD risks to calculate individual transition probabilities for moving from the CVD-free

1  
2 state to the initial CVD-event states. Also, individual patients could die from non-vascular  
3 causes, depending on their age and gender. The non-CVD death transition probabilities  
4 were taken from Briggs et al.[11] Transition probabilities for moving from primary event  
5 health states to subsequent non-fatal health states are taken from Ward et al.[10]  
6  
7  
8  
9

### 10 11 12 **Measuring cost**

13  
14 Data on resources used during the trial and staff contacts were recorded in case record  
15 forms and then converted into electronic format. To determine the total one-year costs for  
16 each group, we obtained unit costs for all relevant items of resources used in the trial:  
17  
18  
19

20  
21  
22 *1. Costs relating to EUROACTION programme and other contacts in primary care were*  
23 *obtained from the programme facilitators and included the EUROACTION nurses costs,*  
24 *training costs, production of patient educational materials and any other costs*  
25 *associated with implementing the programme. The average time spent by staff for all*  
26 *patient contacts at baseline and one-year was provided by each centre. Hourly wage*  
27 *rates of the staff salaries and training were calculated and then applied to these various*  
28 *patient contacts. We costed the EUROACTION family information packs, a pocket-*  
29 *sized personal record card, questionnaires and group sessions that each patient in the*  
30 *intervention group received as part of their prevention programme.*  
31  
32  
33  
34  
35  
36  
37  
38  
39  
40  
41  
42

43  
44 Costs were applied to other contacts with health care professionals, such as GPs,  
45 outside of the intervention programme for both arms and these costs were based on  
46 national estimates of the staff salaries involved and estimates of the average time spent  
47 with the patient provided by the trial co-ordinators.  
48  
49  
50

51  
52  
53 *2. Cardiac-related drug costs.* Data was collected on patient-specific cardiac-related  
54 medications including the drug name and dose at baseline and one-year. This gave  
55 point of time information, but no start or end dates. So for each patient it was assumed  
56  
57  
58  
59  
60

1  
2 that they would remain on the same medication at a constant dose for the entire  
3  
4 duration e.g. from baseline to one-year. National cost estimates for the drugs were  
5  
6 provided by trial co-ordinators from each country and were applied accordingly to the  
7  
8 relevant dose and length of time on a patient-specific basis.  
9

10  
11  
12 *3. Cardiac-related procedures and tests.* During the trial, patients within both groups  
13  
14 may have required inpatient or outpatient admissions for cardiac-related procedures, or  
15  
16 undertaken any cardiac-related tests. The procedures were costed according to HRG  
17  
18 episodes for each country and the other tests or bed days as simple unit costs.  
19  
20 National unit cost estimates for cardiac-related procedures and tests for each country  
21  
22 were obtained from a database held by United BioSource Corporation (Erwin De Cock,  
23  
24 personal communication, May 2007) for all countries, except Denmark and Poland. For  
25  
26 these two countries, national unit cost estimates were provided from contacts within the  
27  
28 Centre for Applied Health Services Research and Technology in Denmark (Jan  
29  
30 Sørensen, personal communication, January 2007) and from the Ministry of Health in  
31  
32 Poland (Andrzej Pająk, personal communication, June 2007).  
33  
34  
35  
36

37 As the study was based in six countries, a costing algorithm was developed to calculate a  
38  
39 total cost per patient for each country. The costs of the programme were valued in local  
40  
41 currencies and then converted to 2006/2007 £ (GBP) using purchasing power parities.[12]  
42  
43 Table 1 presents the total one-year costs by group and country.  
44  
45  
46

47 Subsequent costs relating to health states occupied within the model were based on UK  
48  
49 estimates (see Appendix). It was assumed that patients in a CVD-free state would continue  
50  
51 to receive the cardiac-related medications and primary care contacts (outside of the  
52  
53 intervention programme) that they received during the trial. The mean cost of these  
54  
55 medications and contacts for all patients across both arms was applied to each individual  
56  
57 patient within the model who remained in the event-free health state for subsequent years.  
58  
59  
60

### ***Health state utilities***

To estimate quality-adjusted life years (QALYs) the model requires utility values for each state adjusted by age. For patients who were event-free, the utility values were based on UK general population norms [13]; utilities for events/states were taken from Ward et al [10] which were all were based on UK studies and were obtained using the EQ-5D (see Appendix).

### ***Measuring the impact of the intervention***

The study provided results only for a one-year follow-up. We estimated results for a range of possible durations of effect, assuming that the CVD risk reduction experienced by the intervention patients persisted for 0 through to 10 additional years (11-year time horizon), after which they reverted to their individual CVD risk factor levels at the start of the study (adjusted for age). For UC patients, it was assumed that patients would remain at their one-year CVD risk (adjusted annually by age) throughout the model.

### ***Measuring cost-effectiveness***

Using the Markov model we calculated for each patient their expected quality-adjusted survival (based on their likelihood of surviving each cycle and their expected health state utility value) and their expected costs. Cost-effectiveness was measured in terms of the incremental cost per QALY gained (ICER). Future costs and benefits were discounted at 3.5%. [14]

### ***Statistical analyses***

All statistical analyses were performed in Stata version 10 [15] or Microsoft Excel and a p-value  $\leq 0.05$  was considered to be statistically significant. We present unadjusted and adjusted cost-effectiveness results. The adjusted results controlled for group allocation, age, gender, age\*gender interactions, country, and baseline risk factors using OLS regressions.

1  
2 As only a random sub-sample of UC patients were seen at baseline, regression analyses  
3  
4 were used to predict baseline values for those patients who had missing values. For total  
5  
6 and HDL cholesterol and SBP, OLS regression was used to predict values in those patients  
7  
8 with missing values, as a function of age, gender and country. For the three binary variables  
9  
10 (medications, smoking and diabetes), logistic regression models were used to predict the  
11  
12 probability of each binary outcome. Predicted values  $\geq 0.5$  were categorised to a value of 1  
13  
14 and values  $< 0.5$  were categorised as 0. In the adjusted models we also included an  
15  
16 indicator for whether or not each control variable was missing.  
17  
18

19  
20  
21 Bootstrapping was undertaken on both unadjusted and adjusted costs and effects using  
22  
23 10,000 replications to provide 95% confidence intervals around the mean. Probabilistic  
24  
25 sensitivity analyses were conducted to obtain cost-effectiveness acceptability curves  
26  
27 (CEACs).  
28  
29

### 30 31 **Sensitivity analysis**

32  
33 The main analysis modelling was limited to ten years, in the absence of robust longer-term  
34  
35 risk models. As a sensitivity analysis, we used a simplified longer-term model to check  
36  
37 whether the conclusions of the main analysis would have been likely to be different if a  
38  
39 longer-term perspective had been adopted e.g. 25 years. This model essentially assumed  
40  
41 no further effect of the intervention but modelled out fully the possible QALY gains from the  
42  
43 medium-term (11 year) differences in mortality and event rates.  
44  
45

### 46 47 **Results**

48  
49 We modelled 1,019 patients in the intervention arm and 1,005 patients in the UC arm who  
50  
51 were assessed at one-year.[4] The intervention group had fewer males than the UC group:  
52  
53 49.8% vs. 57.4% male ( $p=0.001$ ), and was significantly younger (mean age at one-year:  
54  
55 intervention: 61.5 years vs. usual care: 62.3 years,  $p=0.011$ ).  
56  
57  
58  
59  
60

1  
2  
3  
4  
5  
6  
7  
8  
9  
10  
11  
12  
13  
14  
15  
16  
17  
18  
19  
20  
21  
22  
23  
24  
25  
26  
27  
28  
29  
30  
31  
32  
33  
34  
35  
36  
37  
38  
39  
40  
41  
42  
43  
44  
45  
46  
47  
48  
49  
50  
51  
52  
53  
54  
55  
56  
57  
58  
59  
60

When testing the validity of the Framingham risk equations to the study population we found that 8 intervention patients and 1 UC sub-sample patient experienced a CHD-event. The risk equations produced a close match, predicting 8.5 patients with a first CHD-event in the intervention group and 2.0 in the UC sub-sample.

In terms of the unadjusted results, the incremental costs of the intervention are £362-£419 depending on the duration of the effect of the intervention and the incremental QALYs are 0.076-0.085 (see Table 2). As expected, the incremental costs fall and the incremental QALYs rise as the duration of the effect of the intervention beyond the end of the trial increases. The incremental cost per QALY gained range from £5,539 (95% CI £2,625-£29,627) to £4,266 (95% CI £2,059-£15,945). The unadjusted CEACs under each scenario are in Figure 1a and highlights the results in Table 2 that in all scenarios over 95% of the bootstrapped replications are less than £20,000.

After controlling for differences in age, gender, country and baseline risk factors, the intervention is associated with higher costs and lower QALYs than the UC arm in every scenario. As a result, the intervention is dominated by UC. The adjusted CEACs are in Figure 1b (additional adjusted CEACs, controlling for age, gender and country only are in the Appendix). At a cost-effectiveness threshold of £20,000 the EUROACTION intervention will be cost-effective in under 6% of cases.

The sensitivity analysis produced predictable results that in no way changed the conclusions of the analysis. Using the unadjusted data, the cost-effectiveness of the intervention was further enhanced, and using the adjusted data the domination of UC over the intervention remained.

## Discussion

1  
2 Although this large European trial demonstrated that a nurse-coordinated preventive  
3 cardiology programme in primary care helped more high risk patients to achieve the lifestyle  
4 and risk factor targets in comparison with UC this does not appear to be cost-effective.  
5  
6 However, these cost-effectiveness analyses require careful qualification because they are  
7  
8 subject to a number of uncertainties which are a consequence of the study design and  
9  
10 important limitations in the statistical model used.  
11  
12

13  
14  
15  
16 The differences in the adjusted and unadjusted results emphasise that the study design,  
17 based on matching pairs of general practices in each country, did not eliminate baseline  
18 differences between the two groups in cardiovascular risk factors. These differences meant  
19 that the two groups had different levels of baseline risk, higher in intervention than usual  
20 care, but the economic results have adjusted for these baseline differences. Though these  
21 differences were small in absolute terms they have a substantial effect on the estimates of  
22 absolute risk of future cardiovascular events, and therefore on the difference in effectiveness  
23 between intervention and UC. Additionally, the study recorded its primary endpoints at  
24 baseline and one-year, and to avoid 'contamination' by recording risk factor levels in UC,  
25 baseline measurements were only made in a sub-sample of UC patients. Thus, we do not  
26 have before and after measurements for 75% of the UC patients.  
27  
28  
29  
30  
31  
32  
33  
34  
35  
36  
37  
38  
39

40  
41 Our estimates of the risk of future CVD-events are based on published risk equations.[5]  
42 These are derived from a large, well characterised cohort (8491 participants) and predict  
43 CVD risk as opposed to CHD risk alone. The C statistic for the model ranges from 0.76  
44 (men) to 0.79 (women) suggesting that additional risk factors could potentially improve the  
45 model's discriminatory power. Other risk models have included risk factors such as family  
46 history of CVD, social deprivation and biomarkers e.g. hs-CRP [16-17] although these  
47 models also have their own limitations.  
48  
49  
50  
51  
52  
53  
54  
55  
56  
57  
58  
59  
60



1  
2  
3  
4  
5  
6  
7  
8  
9  
10  
11  
12  
13  
14  
15  
16  
17  
18  
19  
20  
21  
22  
23  
24  
25  
26  
27  
28  
29  
30  
31  
32  
33  
34  
35  
36  
37  
38  
39  
40  
41  
42  
43  
44  
45  
46  
47  
48  
49  
50  
51  
52  
53  
54  
55  
56  
57  
58  
59  
60

However, to date lifestyle factors such as dietary habits and physical inactivity although important in the aetiology of CHD [18] and independent of the other major risk factors, have not been included in such risk scores, because they are difficult to accurately quantify. The omission of these important lifestyle factors in the Framingham risk equations may be particularly relevant in our study as the cornerstone of the EUROACTION programme was lifestyle change which was clearly evident in the study's most striking achievements in this area including significantly higher fruit and vegetable consumption ( $p = 0.005$ ); physical activity levels ( $p = 0.01$ ); and weight loss ( $p = 0.005$ ).

It is thus possible that our estimates of relative differences in absolute risk between the groups may understate the full effects of the intervention on long-term CVD risk. However, we showed that the risk equations are able to predict CHD events in the study population in the one-year follow-up period, but the accuracy of the risk equations over the ten-year period of our study remains untested.

Our modelling also requires an assumption about how long any differential effect of the intervention persists. Nothing is known about the longer-term effects of EUROACTION, and there are few studies that have looked at longer-term changes. The longest follow-up to a relevant life-style change appears to be the OXCHECK study which showed that the benefits of health checks were sustained over three years.[19-20] However, whatever the duration of effect beyond the trial, and even when a 25-year model was used, the policy conclusions remain the same.

Finally, our model uses a regression analysis approach so that a UK specific estimate can be drawn from the complete multinational EUROACTION dataset on net resource use, costs and net effects of the intervention. The epidemiological, utilities and cost data for the longer-term modelling of risk and events is based on UK data alone. Thus, the results are applicable to the UK and not specifically to the other EUROACTION countries. Whilst formal

1  
2 analysis would be needed to confirm this, the coefficients on the country parameters in the  
3  
4 regression analyses of both costs and outcomes suggest that the cost-effectiveness would  
5  
6 be broadly similar in the other countries.  
7  
8  
9

## 10 **Conclusion**

11  
12 Although the EUROACTION study demonstrated in high risk patients in primary care  
13  
14 significant improvements in lifestyle and CVD risk factors, it is not possible to show, using  
15  
16 the best available risk equations, that the intervention was cost-effective. The available risk  
17  
18 modelling is based on a limited number of risk factors, which do not include diet or physical  
19  
20 activity, and a healthier lifestyle was the most important outcome of this trial. Therefore,  
21  
22 whether or not an intervention such as that offered by EUROACTION is cost-effective  
23  
24 remains an open question that could be answered by a longer term trial with major adverse  
25  
26 cardiovascular events as the primary endpoint.  
27  
28  
29  
30  
31  
32  
33  
34  
35  
36  
37  
38  
39  
40  
41  
42  
43  
44  
45  
46  
47  
48  
49  
50  
51  
52  
53  
54  
55  
56  
57  
58  
59  
60

## Acknowledgements

### *EUROACTION Steering Group*

A scientific steering group approved the protocol and the design for this matched pair cluster-randomised controlled trial, and is responsible for the scientific integrity of the study.

The steering group has the following membership: D Wood (London, UK, Chairman), G De Backer (Ghent, Belgium), D De Bacquer (Ghent, Belgium), M Buxton (Uxbridge, UK), I Graham (Dublin, Ireland), A Howard (Nice, France), K Kotseva (London, UK), S Logstrup (Brussels, Belgium), H McGee (Dublin, Ireland), M Mioulet (Nice, France), K Smith (Dundee, UK), D Thompson (York, UK), T Thomsen (Glostrup, Denmark), T van der Weijden (Maastricht, the Netherlands).

### *National co-ordinators*

The national co-ordinators for each country are also members of the steering committee.

They are responsible for identifying and recruiting general practices, obtaining ethics committee approval, appointing and supervising staff in the centres and contributing scientifically to the publication of results. The EUROACTION National Co-ordinators and Primary care leaders are as follows:

Denmark: T Thomsen, K Brockelmann; Italy: P Fioretti, A Desideri, S Brusaferrò; Poland: A Pajak, K. Kawecka-Jaszcz, P Jankowski, T Grodzicki; Spain: J De Velasco, A Maiques; Netherlands: T van der Weijden; United Kingdom: D Wood, J Morrell.

### *Co-ordinating and Data Management Centre*

The Co-ordinating and Data Management Centre is the Department of Cardiovascular Medicine, National Heart and Lung Institute at Charing Cross Campus, Imperial College, London, UK (Head Professor David Wood). The following staff have specific responsibilities as described: K Kotseva, Senior Clinical Research Fellow; S Connolly, Research Fellow; C Jennings, Study Nurse Co-ordinator; A Mead, Chief Dietician; J Jones, Superintendent

1  
2  
3  
4  
5  
6  
7  
8  
9  
10  
11  
12  
13  
14  
15  
16  
17  
18  
19  
20  
21  
22  
23  
24  
25  
26  
27  
28  
29  
30  
31  
32  
33  
34  
35  
36  
37  
38  
39  
40  
41  
42  
43  
44  
45  
46  
47  
48  
49  
50  
51  
52  
53  
54  
55  
56  
57  
58  
59  
60

Physiotherapist; A Holden, Physical activity Co-ordinator; T Collier, Statistician; M Alston, D Charlesworth, P Homewood, K Pandya, M Somaia, IT specialists/Data managers; S Graves, Research Administrator; W Leacock, D Xenikaki, Administrative Assistants. The following experts advised the Co-ordinating Centre on dietary and physical activity assessment: Professor Gary Frost, Professor Barry Margetts, Dr Mike Nelson and Dr Charlie Foster.

#### *Central Laboratory*

Central Laboratory analysis of total cholesterol, HDL cholesterol, triglycerides, glucose and HbA1c are undertaken by A McLelland, R Birrell and G Beastall in the Department of Pathological Biochemistry, Royal Infirmary, Glasgow (Head of Department J Shepherd).

#### *Statistical Centres*

The statistical analyses for the primary endpoints were undertaken by D De Bacquer, Statistician, from the Department of Public Health (Head of Department G De Backer), Ghent University, Belgium, and supplementary analyses by T Collier, Statistician, Department of Medical Statistics, London School of Hygiene and Tropical Medicine, University of London, UK.

#### *Health Economics Centre*

Martin J Buxton, Professor of Health Economics and Director: Health Economics Research Group, Brunel University, UK; Hema Mistry and Matthew Dyer, Research Fellows in Health Economics, Brunel University.

#### *Primary Care Centres*

##### *Denmark*

Intervention Centre: Sundhedscenteret Skanderborg. Dr Lisbeth Rosborg, GP/ Practice Manager; Susanne Holck Mogensen, Nurse.

Usual Care Centre: Gasvej 5, 8700 Horsens. Dr Henrik Zanoni, GP; Lene Henriksen, Nurse.

*Italy*

Intervention Centre: Rive dai Stimatinis 12, 33013 Gemona del Friuli. Dr Beppino Colle, Primary Care Intervention Coordinator; Dr Massimiliano Rugolo, Principal Investigator/GP; Tilla Gurisatti, Nurse.

Usual Care Centre: Via S. Valentino 20, 33100 Udine. Dr Mario Casini, Italy Usual Care Coordinator. Dr Fabrizio Gangi, Italy Usual Care PI/GP. Daniela Gurisatti and Loredana Trevisani, Nurses.

*Netherlands*

Intervention Centre: Gezondheidscentrum Hoensbroek-Noord. Dr Martijn van Nunen and Dr Bem Bruls, GPs; Jasja Janssen, Nurse; Mrs Mathil Sanders, Practice Manager.

Usual Care Centre: Dr Mieke Winten-Huisman and Dr Marc Eyck, GPs; Rene van den Heuvel and Claudia Gessing, Nurses.

*Poland*

Intervention Centre: Centrum Medycyny Profilaktycznej w Krakowie. Dr Krystyna Pająk, Principal Investigator; Lidia Dwojak, Practice Manager; Joanna Śladek-Ratajewicz, GP; Barbara Waligóra and Irena Smarzyńska, Nurses.

Usual Care Centre: Podstawowa Opieka Zdrowotna - Szpital Uniwersytecki w Krakowie. Dr Maria Fornal, Principal Investigator; Dr Jolanta Walczewska, GP; Barbara Wojtanis and Helena Kamińska, Nurses.

*Spain*

Intervention Centre: Centro de Salud Salvador Pau, Valencia. Dr Jorge Navarro, Principal Investigator; Gemma Méndez Pérez, Nurse; Dr. Maria Jose Donat, Dr. Raquel Prieto, Dr. Rosario Gonzalez, Dr. Teresa Almela, Dr. Amaparo Garcia and Dr. Francisco Cortes, GPs.

1  
2 Usual Care Centre: Centro de Salud de Manises, Valencia. Dr Lorenzo Pascual, Principal  
3 Investigador; Rocio Marco, Nurse; Dr Juan Manuel García, Practice Manager; Dr Antonia  
4 Ibañez, Dr. Cecilia Ruiz, Dr. Santos Plaza, Dr. Amparo Moreno and Dr. Carmen Lloret, GPs.  
5  
6  
7  
8  
9

10 *UK*

11  
12 Intervention Centre: Seaside Medical Centre, Eastbourne. Dr Tim Gietzen, Principal  
13 Investigator; Sjouke Ashton, Nurse; George Bordoli, Associate Nurse; Daniel Brookbank and  
14 Angela Hughes, Practice Managers.  
15  
16

17  
18 Usual Care Centre: Green Street Clinic, Eastbourne. Dr Ian McNaughton, Principal  
19 Investigator; Shirley Colvin, Nurse; Heather King, Practice Manager.  
20  
21  
22  
23

24  
25 *Acknowledgement:* EUROACTION is an initiative of the European Society of Cardiology  
26 which highlights its commitment to improve the quality of life of the European population by  
27 reducing the impact of cardiovascular diseases. The study protocol conforms to the ethical  
28 guidelines of the 1995 Declaration of Helsinki with ethics committee approval in all countries  
29 and for every centre. Written informed consent was obtained from every subject.  
30  
31  
32  
33

34 *Competing interest statement:* All authors declare that the answer to the questions on your  
35 competing interest form [bmj.com/cgi/content/full/317/7154/291/DC1](http://bmj.com/cgi/content/full/317/7154/291/DC1) are all No and therefore  
36 have nothing to declare.  
37  
38  
39

40 *Funding:* Sponsored solely by AstraZeneca through the provision of an unconditional  
41 educational grant.  
42  
43  
44

45 *Author contributions:* DW and MB are part of the steering committee and approved the  
46 protocol and the design for this matched paired cluster-randomised trial. DW was  
47 responsible for the overall direction of the project. HM and MD conducted the economic  
48 analysis under the supervision of SM and MB and with guidance from DW. KK was  
49 responsible for local data collection. HM drafted the manuscript with input from all authors;  
50 all authors have approved the final manuscript and were involved in the interpretation of the  
51 results.  
52  
53  
54  
55  
56  
57  
58  
59  
60

Table 1: Observed 1-year costs for EUROACTION study (in £ GBP)

| 2006/2007 prices    | Denmark        | Italy          | Netherlands    | Poland         | Spain          | UK             | Total          |
|---------------------|----------------|----------------|----------------|----------------|----------------|----------------|----------------|
| <b>Intervention</b> |                |                |                |                |                |                |                |
| N                   | 104            | 165            | 191            | 234            | 199            | 126            | 1,019          |
| Mean (SD)           | £589 (£379)    | £595 (£366)    | £756 (£466)    | £515 (£179)    | £588 (£269)    | £625 (£181)    | £608 (£329)    |
| Median              | £541           | £562           | £704           | £463           | £550           | £594           | £560           |
| IQR                 | £473 to £614   | £451 to £680   | £546 to £862   | £374 to £616   | £420 to £714   | £530 to £729   | £449 to £714   |
| Range               | £268 to £4,054 | £179 to £3,733 | £166 to £5,064 | £282 to £1,578 | £139 to £1,669 | £163 to £1,206 | £139 to £5,064 |
| <b>Usual Care</b>   |                |                |                |                |                |                |                |
| N                   | 154            | 194            | 123            | 160            | 193            | 181            | 1,005          |
| Mean (SD)           | £295 (£490)    | £201 (£365)    | £246 (£307)    | £159 (£167)    | £138 (£207)    | £307 (£563)    | £221 (£384)    |
| Median              | £193           | £146           | £125           | £105           | £68            | £196           | £142           |
| IQR                 | £152 to £275   | £104 to £198   | £84 to £250    | £84 to £159    | £56 to £122    | £140 to £303   | £90 to £225    |
| Range               | £98 to £3,364  | £70 to £4,455  | £65 to £2,806  | £60 to £1,255  | £40 to £2,173  | £73 to £6,500  | £40 to £6,500  |

Table 2: Results from cost-effectiveness model

|                                   | Duration of effect of intervention beyond the end of the trial (model time horizon = 11* years in all cases) |                          |                          |                          |
|-----------------------------------|--------------------------------------------------------------------------------------------------------------|--------------------------|--------------------------|--------------------------|
|                                   | 0 years                                                                                                      | 2 years                  | 5 years                  | 10 years                 |
| <b>Unadjusted costs and QALYs</b> |                                                                                                              |                          |                          |                          |
| Usual care mean cost (SD)         | £2,727 (£29)                                                                                                 | £2,727 (£29)             | £2,727 (£29)             | £2,727 (£29)             |
| Intervention mean cost (SD)       | £3,146 (£33)                                                                                                 | £3,126 (£31)             | £3,105 (£31)             | £3,089 (£31)             |
| Usual care mean QALYs (SD)        | 6.755 (0.021)                                                                                                | 6.755 (0.021)            | 6.755 (0.021)            | 6.755 (0.021)            |
| Intervention mean QALYs (SD)      | 6.831 (0.021)                                                                                                | 6.835 (0.021)            | 6.838 (0.021)            | 6.840 (0.021)            |
| Incremental costs (95% CI)        | £419 (£332 to £505)                                                                                          | £399 (£315 to £483)      | £378 (£294 to £462)      | £362 (£278 to £447)      |
| Incremental QALYs (95% CI)        | 0.076 (0.017 to 0.135)                                                                                       | 0.079 (0.020 to 0.138)   | 0.083 (0.024 to 0.142)   | 0.085 (0.026 to 0.144)   |
| ICER                              | £5,539                                                                                                       | £5,031                   | £4,561                   | £4,266                   |
| 95% CI                            | £2,625 to £29,627                                                                                            | £2,412 to £22,520        | £2,202 to £18,155        | £2,059 to £15,945        |
| % of bootstrapped ICERs < £20k    | 95.7%                                                                                                        | 97.0%                    | 97.9%                    | 98.4%                    |
| % of bootstrapped ICERs < £30k    | 97.6%                                                                                                        | 98.4%                    | 99.0%                    | 99.2%                    |
| <b>Adjusted costs and QALYs†</b>  |                                                                                                              |                          |                          |                          |
| Incremental costs (95% CI)        | £474 (£368 to £580)                                                                                          | £463 (£358 to £568)      | £450 (£343 to £557)      | £441 (£331 to £550)      |
| Incremental QALYs (95% CI)        | -0.009 (-0.041 to 0.023)                                                                                     | -0.007 (-0.038 to 0.025) | -0.005 (-0.036 to 0.027) | -0.003 (-0.035 to 0.029) |
| ICER                              | Dominated†                                                                                                   | Dominated†               | Dominated†               | Dominated†               |
| 95% CI                            | £21,695 to dominated†                                                                                        | £18,495 to dominated†    | £15,908 to dominated†    | £14,485 to dominated†    |



|                               |       |       |       |        |
|-------------------------------|-------|-------|-------|--------|
| % of bootstrapped ICERs <£20k | 1.97% | 3.16% | 4.57% | 5.76%  |
| % of bootstrapped ICERs <£30k | 5.05% | 6.98% | 9.42% | 11.54% |

SD = standard deviation; QALYs = quality-adjusted life years; ICER = incremental cost-effectiveness ratio; CI = confidence interval

# 1 year study follow-up period plus a 10 year model

† The intervention is more costly and yield fewer QALYs than usual care

‡ Adjusting for the following baseline characteristics: age, gender, age\*gender, country, total and HDL cholesterol, SBP, anti-hypertensive medications, smoking and diabetes.

Figure 1: Cost-effectiveness acceptability curves

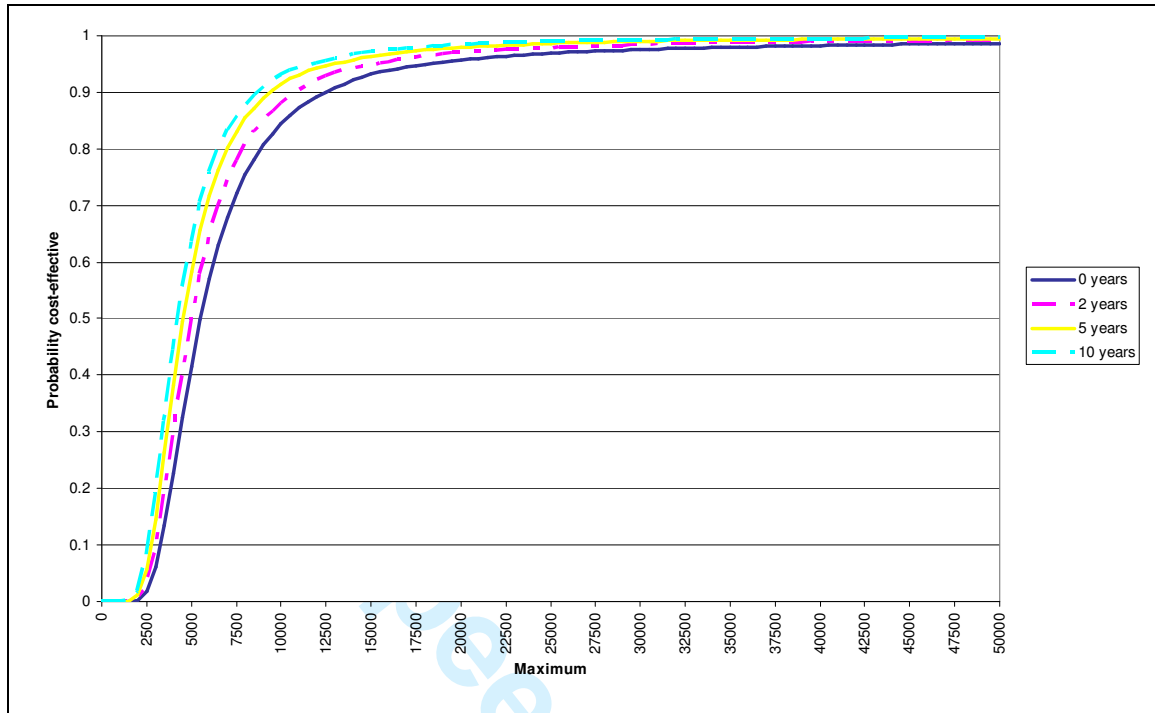

a) Unadjusted results

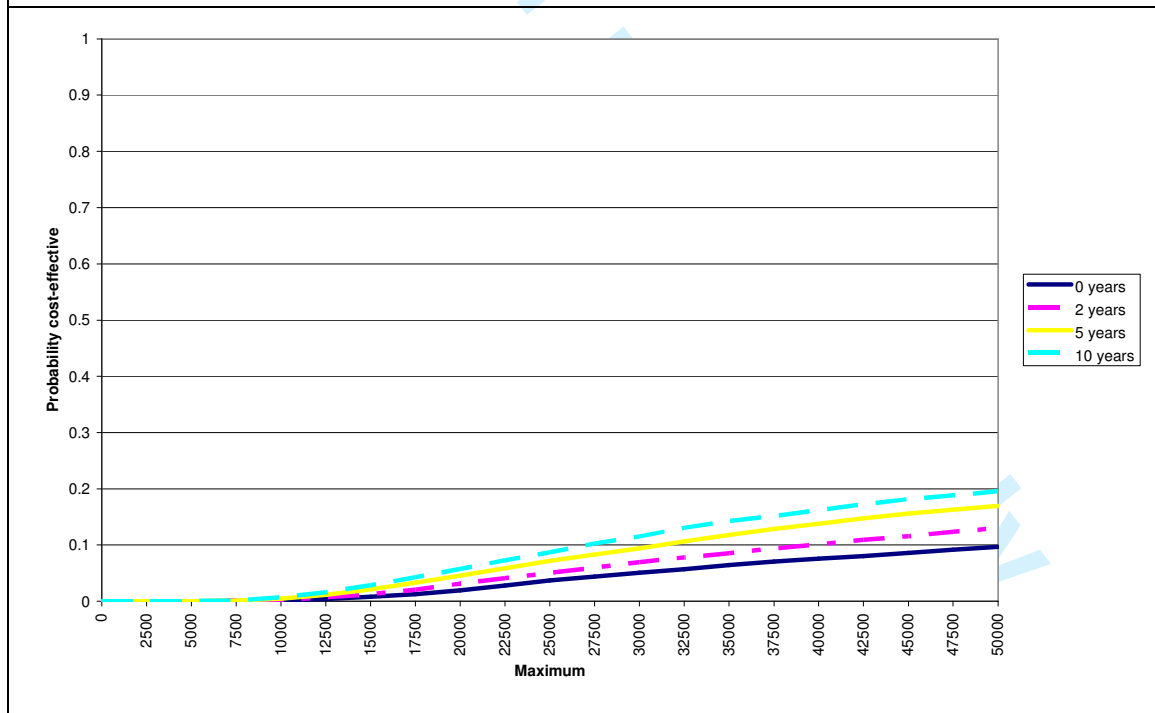

b) Adjusted\* results

\* Adjusted for differences between groups by age, gender, country and baseline risk factors

1  
2  
3  
4  
5  
6  
7  
8  
9  
10  
11  
12  
13  
14  
15  
16  
17  
18  
19  
20  
21  
22  
23  
24  
25  
26  
27  
28  
29  
30  
31  
32  
33  
34  
35  
36  
37  
38  
39  
40  
41  
42  
43  
44  
45  
46  
47  
48  
49  
50  
51  
52  
53  
54  
55  
56  
57  
58  
59  
60

## References

1. Graham I, Atar D, Borch-Johnsen K, et al. European guidelines on cardiovascular disease prevention in clinical practice: executive summary. Fourth Joint Task Force of the European Society of Cardiology and Other Societies on Cardiovascular Disease Prevention in Clinical Practice (Constituted by representatives of nine societies and by invited experts). *Eur Heart J* 2007;28:2375-2414.
2. Kotseva K, Wood D, De Backer G, De Bacquer D, Pyörälä K, Reiner Z, Keil U, on behalf of the EUROASPIRE Study Group. EUROASPIRE III. Management of cardiovascular risk factors in asymptomatic high-risk patients in general practice: cross-sectional survey in 12 European countries. *Eur J Cardiovasc Prev Rehabil* 2010;17:530-540.
3. Wood DA, Kotseva K, Jennings C, et al on behalf of the EUROACTION Study Group. EUROACTION: A European Society of Cardiology demonstration project in preventive cardiology. *Eur Heart J* 2004;6(Supplement J):J3-J15.
4. Wood DA, Kotseva K, Connolly S, et al. Nurse-coordinated multidisciplinary, family-based cardiovascular disease prevention programme (EUROACTION) for patients with coronary heart disease and asymptomatic individuals at high risk of cardiovascular disease: a paired, cluster-randomised controlled trial. *Lancet* 2008;371:1999-2012.
5. D'Agostino RB, Vasan RS, Pencina MJ et al. General cardiovascular risk profile for use in primary care. The Framingham Heart Study. *Circulation* 2008;117:743-53.
6. Miller DK, Homan SM. Determining transition probabilities: confusion and suggestion. *Med Decis Making* 1994;14:52-8.

- 1  
2  
3  
4  
5  
6  
7  
8  
9  
10  
11  
12  
13  
14  
15  
16  
17  
18  
19  
20  
21  
22  
23  
24  
25  
26  
27  
28  
29  
30  
31  
32  
33  
34  
35  
36  
37  
38  
39  
40  
41  
42  
43  
44  
45  
46  
47  
48  
49  
50  
51  
52  
53  
54  
55  
56  
57  
58  
59  
60
7. Sutcliffe SJ, Fox KF, Wood DA, et al. Incidence of coronary heart disease in a health authority in London: review of a community register. *BMJ* 2003;326:20.
8. Bamford J, Sandercock P, Dennis M, et al. A prospective study of acute cerebrovascular disease in the community: the Oxfordshire Community Stroke Project 1981–86. I. Methodology, demography and incident cases of first-ever stroke. *J Neurol Neurosurg Psychiatry* 1988;51:1373–80.
9. Dennis MS, Bamford JM, Sandercock PA, Warlow CP. Incidence of transient ischemic attacks in Oxfordshire, England. *Stroke* 1989;20:333–9.
10. Ward S, Lloyd Jones M, Pandor A, et al. A systematic review and economic evaluation of statins for the prevention of coronary events. *Health Technology Assessment* 2007;11(14).
11. Briggs A, Mihaylova B, Sculpher M, et al. Cost-effectiveness of perindopril in reducing cardiovascular events in patients with stable coronary artery disease using data from the EUROPA study. *Heart* 2007;93:1081-6.
12. Organisation for Economic Co-operation and Development (OECD CPI). OECD Consumer Price Indices. July 2007. Available at: <http://www.oecd.org/>
13. Kind P, Dolan P, Gudex C, Williams A. Variations in population health status: results from a United Kingdom national questionnaire survey. *BMJ* 1998;316:736–41.
14. National Institute for Health and Clinical Excellence (NICE). Guide to methods of technology appraisal. London, June 2008.
15. StataCorp. Stata Statistical Software: Release 10.0. College Station, Texas, USA: Stata Corporation, 2007.

- 1  
2  
3  
4 16. Ridker PM, Buring JE, Rifai N, Cook NR. Development and validation of improved algorithms  
5 for the assessment of global cardiovascular risk in women: the Reynolds Risk Score. *JAMA*  
6 2007;297:611-9.  
7  
8  
9  
10  
11  
12 17. Woodward M, Brindle P, Tunstall-Pedoe H. SIGN group on risk estimation. Adding social  
13 deprivation and family history to cardiovascular risk assessment: the ASSIGN score from the  
14 Scottish Heart Health Extended Cohort (SHHEC). *Heart* 2007;93:172-6.  
15  
16  
17  
18  
19  
20 18. Yusuf S, Hawken S, Ounpuu S, et al. Effect of potentially modifiable risk factors associated  
21 with myocardial infarction in 52 countries (the INTERHEART study): case-control study.  
22 *Lancet* 2004;364:937-52.  
23  
24  
25  
26  
27  
28 19. Fleming P, Godwin M. Lifestyle interventions in primary care: systematic review of  
29 randomized controlled trials. *Can Fam Physician* 2008;54:1706-13  
30  
31  
32  
33  
34 20. Imperial Cancer Research Fund OXCHECK Study Group. Effectiveness of health checks  
35 conducted by nurses in primary care: final results of the OXCHECK study. *BMJ*  
36 1995;310:1099-1104  
37  
38  
39  
40  
41  
42  
43  
44  
45  
46  
47  
48  
49  
50  
51  
52  
53  
54  
55  
56  
57  
58  
59  
60

**Appendix**  
**Table A1: Costs of health states in cost-effectiveness model**

| Health State         | Cost (2006 prices) | Assumption/Source                                                                                                                                                                               | Source                     |
|----------------------|--------------------|-------------------------------------------------------------------------------------------------------------------------------------------------------------------------------------------------|----------------------------|
| Event-Free           | £197               | Based on a mean cost of cardiac-related medication and health care contacts (outside of EUROACTION programme) incurred by all patients during one year follow-up                                | Trial data                 |
| Stable Angina        | £383               | Based on 3 times 15 minutes' GP contact plus medication (plus cost of event-free)                                                                                                               | Ward et al, 2007<br>[10]   |
| Post-stable angina   | £383               | Based on 3 times 15 minutes' GP contact plus medication costs (plus cost of event-free)                                                                                                         | Ward et al, 2007<br>[10]   |
| Unstable angina      | £674               | Based on 3 times 15 minutes' GP contact plus medication plus 60% of patients are also prescribed clopidogrel (plus cost of event-free)                                                          | Ward et al, 2007<br>[10]   |
| Post-unstable angina | £383               | Based on 3 times 15 minutes' GP contact plus medication costs (plus cost of event-free)                                                                                                         | Ward et al, 2007<br>[10]   |
| MI                   | £5,020             | Based on data from Nottingham Heart Attack Register include revascularisation for a proportion of patients, plus primary care and medication costs as unstable angina (plus cost of event-free) | Palmer et al, 2002 [21]    |
| Post-MI              | £383               | Based on 3 times 15 minutes' GP contact plus medication costs (plus cost of event-free)                                                                                                         | Ward et al, 2007<br>[10]   |
| Fatal CHD event      | £1,462             | Based on costs of a fatal MI (plus cost of event-free)                                                                                                                                          | Clarke et al, 2003<br>[22] |
| TIA                  | £1,351             | Based on medication costs plus costs of test and surgery for appropriate patients (plus cost of event-free)                                                                                     | Ward et al, 2007<br>[10]   |
| Post-TIA             | £483               | Based on medication costs only (plus cost of event-free)                                                                                                                                        | Ward et al, 2007<br>[10]   |

|                 |        |                                                                                                                                                |                         |
|-----------------|--------|------------------------------------------------------------------------------------------------------------------------------------------------|-------------------------|
| Stroke          | £8,922 | Based on cost of acute events (mild, moderate and severe stroke) and weighted by distribution of severity of strokes (plus cost of event-free) | Youman et al, 2003 [23] |
| Post-Stroke     | £2,543 | Based on cost of acute events (mild, moderate and severe stroke) and weighted by distribution of severity of strokes (plus cost of event-free) | Youman et al, 2003 [23] |
| Fatal CVD event | £7,832 | Based on cost of fatal stroke (plus cost of event-free)                                                                                        | Youman et al, 2003 [23] |

**Table A2: Utility values for health states used in the model**

| Utility value | Event free | Stable angina | Unstable angina | MI    | TIA   | Stroke |
|---------------|------------|---------------|-----------------|-------|-------|--------|
| 45 - 49       | 0.869      | 0.702         | 0.669           | 0.660 | 0.869 | 0.547  |
| 50 - 54       | 0.848      | 0.685         | 0.653           | 0.644 | 0.848 | 0.533  |
| 55 - 59       | 0.826      | 0.667         | 0.636           | 0.628 | 0.826 | 0.520  |
| 60 - 64       | 0.805      | 0.650         | 0.620           | 0.612 | 0.805 | 0.506  |
| 65 - 69       | 0.784      | 0.633         | 0.604           | 0.596 | 0.784 | 0.493  |
| 70 - 74       | 0.763      | 0.617         | 0.588           | 0.580 | 0.763 | 0.480  |
| 75 - 79       | 0.741      | 0.599         | 0.571           | 0.563 | 0.741 | 0.466  |
| 80 - 84       | 0.720      | 0.582         | 0.544           | 0.547 | 0.720 | 0.453  |
| 85 - 89       | 0.699      | 0.565         | 0.538           | 0.531 | 0.699 | 0.440  |
| 90 - 94       | 0.678      | 0.548         | 0.522           | 0.515 | 0.678 | 0.426  |
| 95 - 99       | 0.656      | 0.530         | 0.505           | 0.499 | 0.656 | 0.413  |
| 100 +         | 0.635      | 0.513         | 0.489           | 0.483 | 0.635 | 0.399  |

Sources: Event free (Kind et al, 1998) [13]; Stable angina (Meslop et al, 2003) [24]; Unstable angina and MI (Goodacre et al, 2004) [25]; TIA (Kind et al, 1998) [13]; Stroke (Tengs et al, 2003) [26]



Table A3: Additional results from the cost-effectiveness model

|                                                       | Duration of effect of intervention beyond the end of the trial (model time horizon = 11 <sup>#</sup> years in all cases) |                          |                          |                          |
|-------------------------------------------------------|--------------------------------------------------------------------------------------------------------------------------|--------------------------|--------------------------|--------------------------|
|                                                       | 0 years                                                                                                                  | 2 years                  | 5 years                  | 10 years                 |
| <b>Adjusted costs and QALYs</b>                       |                                                                                                                          |                          |                          |                          |
| <b><i>Controlling for age and gender only</i></b>     |                                                                                                                          |                          |                          |                          |
| Incremental costs (95% CI)                            | £512 (£438 to £589)                                                                                                      | £491 (£418 to £563)      | £468 (£396 to £541)      | £452 (£378 to £525)      |
| Incremental QALYs (95% CI)                            | -0.016 (-0.036 to 0.004)                                                                                                 | -0.012 (-0.032 to 0.008) | -0.008 (-0.028 to 0.012) | -0.006 (-0.026 to 0.014) |
| ICER                                                  | Dominated†                                                                                                               | Dominated†               | Dominated†               | Dominated†               |
| 95% CI                                                | £105,653 to dominated†                                                                                                   | £54,307 to dominated†    | £34,845 to dominated†    | £27,907 to dominated†    |
| % of bootstrapped ICERs <£20k                         | 0.01%                                                                                                                    | 0.10%                    | 0.34%                    | 0.71%                    |
| % of bootstrapped ICERs <£30k                         | 0.19%                                                                                                                    | 0.52%                    | 1.69%                    | 3.11%                    |
| <b><i>Controlling for age, gender and country</i></b> |                                                                                                                          |                          |                          |                          |
| Incremental costs (95% CI)                            | £497 (£424 to £571)                                                                                                      | £476 (£404 to £548)      | £453 (£381 to £526)      | £436 (£364 to £509)      |
| Incremental QALYs (95% CI)                            | -0.011 (-0.031 to 0.009)                                                                                                 | -0.007 (-0.027 to 0.013) | -0.003 (-0.023 to 0.017) | -0.001 (-0.021 to 0.019) |
| ICER                                                  | Dominated†                                                                                                               | Dominated†               | Dominated†               | Dominated†               |
| 95% CI                                                | £49,903 to dominated†                                                                                                    | £33,290 to dominated†    | £24,001 to dominated†    | £20,342 to dominated†    |
| % of bootstrapped ICERs <£20k                         | 0.07%                                                                                                                    | 0.34%                    | 1.11%                    | 2.32%                    |
| % of bootstrapped ICERs <£30k                         | 0.61%                                                                                                                    | 1.81%                    | 4.78%                    | 7.76%                    |

SD = standard deviation; QALYs = quality-adjusted life years; ICER = incremental cost-effectiveness ratio; CI = confidence interval

<sup>#</sup> 1 year study follow-up period plus a 10 year model

† The intervention is more costly and yield fewer QALYs than usual care

1  
2  
3  
4  
5  
6  
7  
8  
9  
10  
11  
12  
13  
14  
15  
16  
17  
18  
19  
20  
21  
22  
23  
24  
25  
26  
27  
28  
29  
30  
31  
32  
33  
34  
35  
36  
37  
38  
39  
40  
41  
42  
43  
44  
45  
46  
47  
48  
49  
50  
51  
52  
53  
54  
55  
56  
57  
58  
59  
60

Figure A1: Adjusted cost-effectiveness results

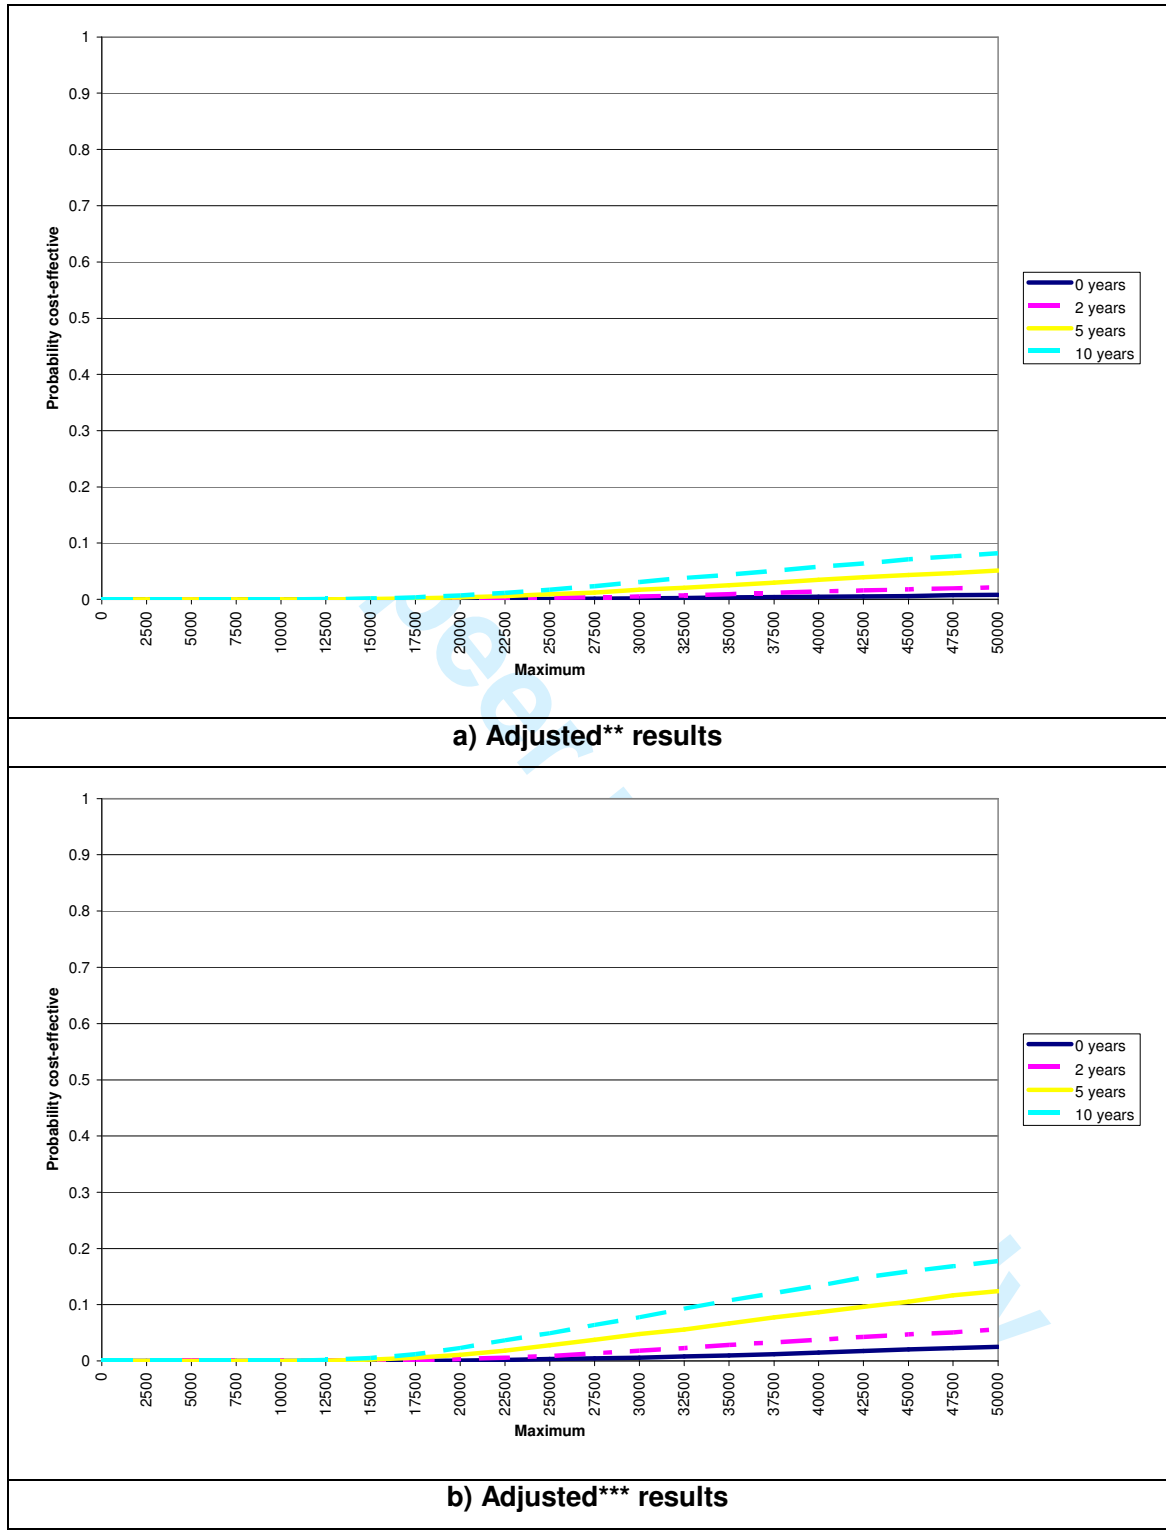

\*\* Adjusted for differences between groups by age and gender

\*\*\* Adjusted for differences between groups by age, gender and country

**Additional References for Appendix**

- 1  
2  
3  
4  
5  
6  
7  
8  
9  
10  
11  
12  
13  
14  
15  
16  
17  
18  
19  
20  
21  
22  
23  
24  
25  
26  
27  
28  
29  
30  
31  
32  
33  
34  
35  
36  
37  
38  
39  
40  
41  
42  
43  
44  
45  
46  
47  
48  
49  
50  
51  
52  
53  
54  
55  
56  
57  
58  
59  
60
21. Palmer S, Sculpher M, Philips Z, et al. A cost-effectiveness model comparing alternative management strategies for the use of glycoprotein IIb/IIIa antagonists in non-ST-elevation acute coronary syndrome. Report to the National Institute for Health and Clinical Excellence. <http://www.nice.org.uk/Docref.asp?d=32030>. London: NICE; 2002.
22. Clarke P, Gray A, Legood R, Briggs A, Holman R. The impact of diabetes-related complications on healthcare costs: results from the United Kingdom Prospective Diabetes Study (UKPDS Study No. 65). *Diabet Med* 2003;20:442–50.
23. Youman P, Wilson K, Harraf F, Kalra L. The economic burden of stroke in the United Kingdom. *Pharmacoeconomics* 2003;21(Suppl 1):43–50.
24. Meslop K, Boothroyd DB, Hlatky MA. Quality of life and time trade-off utility measures in patients with coronary artery disease. *Am Heart J* 2003;145:36–41.
25. Goodacre S, Nicholl J, Dixon S, et al. Randomised controlled trial and economic evaluation of a chest pain observation unit compared with routine care. *BMJ* 2004;328:254.
26. Tengs TO, Lin TH. A meta-analysis of quality of life estimates for stroke. *Pharmacoeconomics* 2003;21:191–200.

**Cost-effectiveness of a European preventive cardiology programme in primary care**

Hema Mistry, Stephen Morris, Matthew Dyer, Kornelia Kotseva, David Wood, Martin Buxton  
and on behalf of the EUROACTION study group

**Health economics checklist**

| Requirement                                                                                       | Manuscript page |
|---------------------------------------------------------------------------------------------------|-----------------|
| <b>Study design</b>                                                                               |                 |
| (1) The research question is stated                                                               | 2, 4            |
| (2) The economic importance of the research question is stated                                    | 2, 4            |
| (3) The viewpoint(s) of the analysis are clearly stated and justified                             | 2,5             |
| (4) The rationale for choosing the alternative programmes or interventions compared is stated     | 4               |
| (5) The alternatives being compared are clearly described                                         | 5               |
| (6) The form of economic evaluation used is stated                                                | 4,9             |
| (7) The choice of form of economic evaluation is justified in relation to the questions addressed | 9               |
| <b>Data collection</b>                                                                            |                 |
| (8) The source(s) of effectiveness estimates used are stated                                      | 9               |
| (9) Details of the design and results of effectiveness study are given                            | 9, 11           |
| (10) Method of synthesis/meta-analysis of estimates are given                                     | NA              |
| (11) The primary outcome measure(s) for the economic evaluation are clearly stated                | 2, 9            |
| (12) Methods to value health states and other benefits are stated                                 | 9               |
| (13) Details of the subjects from whom valuations were obtained are given                         | 9               |
| (14) Productivity changes (if included) are reported separately                                   | NA              |
| (15) The relevance of productivity changes to question is discussed                               | NA              |
| (16) Quantities of resources are reported separately from their unit costs                        | 7-9,<br>26-27   |
| (17) Methods for the estimation of quantities and unit costs are described                        | 7-9             |
| (18) Currency and price data are recorded                                                         | 8               |
| (19) Details of currency of price adjustments for inflation or currency conversion are given      | 8               |
| (20) Details of any model used are given                                                          | 5-10            |
| (21) The choice of model used and the key parameters are justified                                | 5-10            |
| <b>Analysis and interpretation of results</b>                                                     |                 |
| (22) Time horizon of costs and benefits is stated                                                 | 9               |
| (23) The discount rate(s) is stated                                                               | 9               |
| (24) The choice of rate(s) is justified                                                           | 9               |
| (25) An explanation is given if costs or benefits are not discounted                              | NA              |
| (26) Details of statistical tests and confidence intervals are given for stochastic data          | 9-10            |
| (27) The approach to sensitivity analysis is given                                                | 10              |
| (28) The choice of variables for sensitivity analysis is justified                                | 10              |
| (29) The ranges over which the variables are varied are stated                                    | 10              |
| (30) Relevant alternatives are compared                                                           | 11-12           |
| (31) Incremental analysis is reported                                                             | 11-12           |
| (32) Major outcomes are presented in a disaggregated as well as aggregated form                   | 11-12,<br>20-21 |
| (33) The answer to the study question is given                                                    | 12, 14          |
| (34) Conclusions follow from the data reported                                                    | 12-14           |
| (35) Conclusions are accompanied by the appropriate caveats                                       | 12-14           |

1  
2  
3  
4  
5  
6  
7  
8  
9  
10  
11  
12  
13  
14  
15  
16  
17  
18  
19  
20  
21  
22  
23  
24  
25  
26  
27  
28  
29  
30  
31  
32  
33  
34  
35  
36  
37  
38  
39  
40  
41  
42  
43  
44  
45  
46  
47  
48  
49  
50  
51  
52  
53  
54  
55  
56  
57  
58  
59  
60

## Cost-effectiveness of a European preventive cardiology programme in primary care: a Markov modelling approach

Hema Mistry<sup>\*ab</sup>

Stephen Morris<sup>c</sup>

Matthew Dyer<sup>d</sup>

Kornelia Kotseva<sup>e</sup>

David Wood<sup>e</sup>

Martin Buxton<sup>ba</sup>

and on behalf of the EUROACTION study group

<sup>a</sup>[Health Economics Unit, University of Birmingham, Birmingham, B15 2TT, UK](#)

<sup>ba</sup>[Health Economics Research Group, Brunel University, Uxbridge, UB8 3PH, UK](#)

<sup>b</sup>[Health Economics Unit, University of Birmingham, Birmingham, B15 2TT, UK](#)

<sup>c</sup>[Department of Applied Health Researchhealth Care Evaluation Group, University College London, London, WC1E 6BT, UK](#)

<sup>d</sup>[National Institute for Health and Clinical Excellence, Midcity Place, 71 High Holborn, London, WC1V 6NA, UK](#)  
[Creativ-Ceutical, 29-30 Windmill Street, London, W1T 2JL, UK](#)

<sup>e</sup>Department of Cardiovascular Medicine, International Centre for Circulatory Health, National Heart and Lung Institute, Imperial College London, London, W2 1LA, UK

\*Corresponding author:

Dr Hema Mistry

Research Fellow in Health Economics

Health Economics Unit

University of Birmingham

Formatted: Not Superscript/ Subscript

1  
2  
3  
4  
5  
6  
7  
8  
9  
10  
11  
12  
13  
14  
15  
16  
17  
18  
19  
20  
21  
22  
23  
24  
25  
26  
27  
28  
29  
30  
31  
32  
33  
34  
35  
36  
37  
38  
39  
40  
41  
42  
43  
44  
45  
46  
47  
48  
49  
50  
51  
52  
53  
54  
55  
56  
57  
58  
59  
60

Edgbaston  
Birmingham, UK, B15 2TT  
Tel. +44 (0)121 414 8970  
Email: [H.Mistry@bham.ac.uk](mailto:H.Mistry@bham.ac.uk)

For peer review only

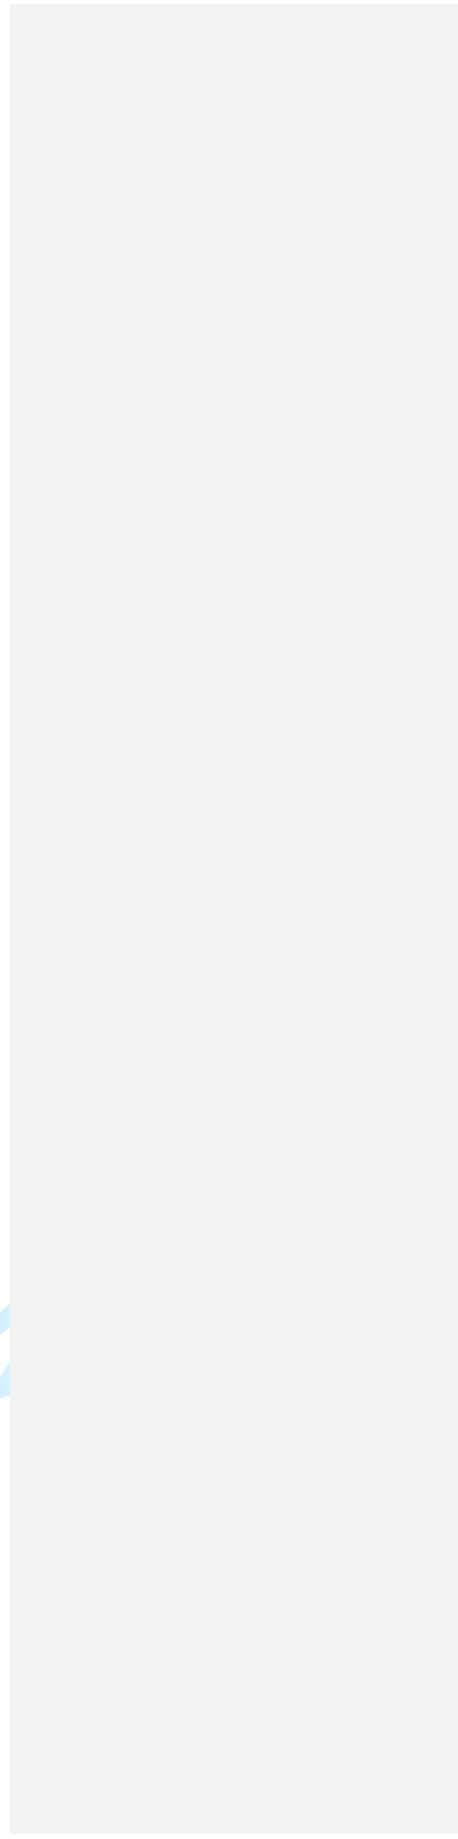

1  
2  
3  
4  
5  
6 **Abstract (word count 3096)**  
7  
8

9  
10 **Objective:** To investigate the longer-term cost-effectiveness of a nurse-coordinated  
11 preventive cardiology programme for primary prevention of cardiovascular disease  
12 compared to routine practice from a health service perspective.  
13  
14

15  
16  
17 **Design:** A matched, paired cluster-randomised controlled trial.  
18  
19

20 **Setting:** Six pairs of general practices in six countries.  
21  
22

23  
24 **Participants:** 1,019 patients were randomised to the EUROACTION intervention  
25 programme and 1,005 patients to usual care and who completed the one-year follow-up-  
26  
27

28  
29 **Outcome measures:** Evidence on health outcomes and costs were based on patient level  
30 data from the study, which had a one-year follow-up period. Future risk of cardiovascular  
31 (CVD) events was modelled, using published risk models based on patient characteristics.  
32 An individual level Markov model for each patient was used to extrapolate beyond the end of  
33 the trial, which was populated with data from published sources. We used an 11-year time  
34 horizon and investigated the impact on cost-effectiveness of varying the duration of the  
35 effect of the intervention beyond the end of the trial. Results are expressed as incremental  
36 cost per quality-adjusted life year gained.  
37  
38  
39  
40  
41  
42  
43

44  
45 **Results:** Unadjusted results found the intervention to be more costly and also more effective  
46 than usual care. However, after adjusting for differences in age, gender, country and  
47 baseline risk factors, the intervention was dominated by usual care, but this analysis was not  
48 able to take into account of lifestyle changes in terms of diet and physical activity.  
49  
50  
51  
52  
53  
54  
55  
56  
57  
58  
59  
60

1  
2  
3  
4  
5  
6 **Conclusions:** Although the EUROACTION study achieved healthier lifestyle changes and  
7 improvements in management of blood pressure and lipids for patients at high risk of CVD,  
8 compared to usual care, it was not possible to show, using available risk equations which do  
9 not incorporate diet and physical activity, that the intervention reduced longer-term  
10 cardiovascular risk cost-effectively. Whether or not an intervention such as that offered by  
11 EUROACTION is cost-effective requires a longer term trial with major cardiovascular events  
12 as the outcome.  
13  
14  
15  
16  
17  
18  
19  
20  
21  
22  
23  
24  
25  
26  
27  
28  
29  
30  
31  
32  
33  
34  
35  
36  
37  
38  
39  
40  
41  
42  
43  
44  
45  
46  
47  
48  
49  
50  
51  
52  
53  
54  
55  
56  
57  
58  
59  
60



## Article summary

### Article focus

- To investigate the longer-term cost-effectiveness of a nurse-coordinated preventive cardiology programme for primary prevention of cardiovascular disease compared to routine practice.

### Key messages

- The EUROACTION study achieved healthier lifestyle changes and improvements in management of blood pressure and lipids for patients at high risk of CVD, compared to usual care.
- The unadjusted results of the cost-effectiveness analysis found the intervention to be more effective than usual care but also more costly. However, the adjusted results showed that the intervention was dominated by usual care.
- The published cardiovascular risk equations do not take account of lifestyle changes in terms of diet and physical activity and therefore may be inadequate for the evaluation of whether or not a lifestyle intervention to prevent cardiovascular disease is cost-effective.

### Strengths and limitations of the study

- This is the first study assessing the cost-effectiveness of the EUROACTION programme.
- The available cardiovascular risk modelling is based on a limited number of risk factors, which do not include measures of diet or physical activity, and a healthier lifestyle was the most important outcome of the EUROACTION trial.

**Trial Registration number:** ISRCTN 71715857

**Keywords:** Multi-centre studies; cardiovascular prevention programme; cost-effectiveness; Markov model; QALYs.

**Text word Count:** 3,415064

## Introduction

Evidence has shown that individuals with increased risk of cardiovascular disease (CVD) can reduce their risk of cardiovascular morbidity and mortality by stopping smoking, changing their diet, engaging in physical activity, achieving a healthy body weight, and controlling their blood pressure, cholesterol and diabetes.[1] However, not all patients at high risk of developing CVD manage to achieve these recommended lifestyle and risk factor goals and there remains considerable potential to reduce CVD risk in these patients.[2] The EUROACTION study was designed to address the need for preventive cardiology care in everyday clinical practice.[3]

The EUROACTION study was a matched, paired cluster-randomised controlled trial, across eight countries and 24 hospitals and general practices. The project evaluated the impact of a nurse-coordinated, multidisciplinary preventive cardiology programme for coronary patients in hospital and high risk individuals in general practice. It aimed to help all these high risk patients and their families to achieve recommended lifestyle and risk factor targets for CVD prevention in everyday clinical practice over one year. The principal results concluded that the EUROACTION programme achieved healthier lifestyle changes and improvements in risk factor management for patients with coronary heart disease (CHD) and those at high risk of CVD, together with their partners, compared to usual care.[4]

While there is evidence that the EUROACTION programme is effective in terms of modifying lifestyle and some CVD risk factors, there is no evidence as to its cost-effectiveness.

Therefore, this paper aims to model the long-term cost-effectiveness of the EUROACTION programme in comparison with usual care within the primary care setting.

## Methods

### *Patients*

1  
2  
3  
4  
5  
6 The EUROACTION primary care study took place in Denmark, Italy, Netherlands, Poland,  
7 Spain and UK, where a matched pair of general practices was identified, and then  
8 randomised to either the EUROACTION programme or to usual care (UC). GPs  
9 prospectively identified the study population. The comparison was restricted to patients and  
10 did not include partners. Eligibility criteria for patients has previously been published.[4]  
11  
12  
13  
14

15  
16 All intervention patients were assessed at baseline and one-year. These assessments  
17 focussed on smoking habits, diet and physical activity, measurement of body mass index,  
18 blood pressure, cholesterol and glucose levels, and cardiac medications were also recorded.  
19  
20 The programme was delivered by specialist nurses, working with GPs, and supported by  
21 software programmes (HEARTSCORE), educational materials and group workshops to  
22 achieve individual goals. Each person was given a personal record card to record lifestyle  
23 and risk factor goals, medications and appointments. To avoid the possibility that  
24 undergoing baseline assessments might affect outcomes, only a random sub-sample  
25 (~25%) of UC patients were seen at baseline and then all UC patients were invited for  
26 assessment at one-year. In the UC arm, patients did not receive any form of special care.  
27  
28  
29  
30  
31  
32  
33  
34  
35

### 36 **Model structure**

37 We adopted a health service perspective to measure costs and outcomes. Each cycle in the  
38 model is of one year's duration. All patients were CVD-free on entering the model. In each  
39 subsequent cycle patients may remain CVD-event free, they may have a fatal or non-fatal  
40 CVD event, or they may die from non-CVD causes. Once the patient has had an initial CVD  
41 event, then in subsequent cycles they move to the post CVD-event states and they may  
42 move between different CVD states and/or die from CVD or non-CVD causes.  
43  
44  
45  
46  
47  
48  
49

50 The CVD event states are: non-fatal myocardial infarction (MI), stable angina, unstable  
51 angina, CHD death, transient ischaemic attack (TIA), stroke, CVD death and non-CVD  
52 death.  
53  
54  
55  
56  
57  
58  
59  
60

### ***Measuring initial CVD risk***

To estimate the risk of an initial CVD event in a subsequent year we used the D'Agostino et al [5] CVD risk function, derived from the Framingham Heart Study. This calculates individual sex-specific risks for future cardiovascular events (in patients initially free of CVD). These CVD risk equations incorporate as risk factors the natural logarithms of age, total and HDL cholesterol, systolic blood pressure (SBP) if treated with or without anti-hypertensive medications, smoking and diabetes. We used the published calibration factors to focus on the CHD and stroke event states.

Ten-year risks were estimated from the equations and adjusted to one-year values.[6] One-year CVD risk beyond the end of the trial was calculated based on both a) baseline patient characteristics (adjusted for age) for intervention patients only; and b) one-year follow-up characteristics for both groups, in order to evaluate any changes to CVD risk factors as a result of the EUROACTION programme.

### ***Validating the appropriateness of the risk functions of the model***

We tested the validity of applying the D'Agostino et al [5] risk equations to the study population, by comparing the observed number of CHD cases with the number predicted at one-year. Because stroke and TIA incidence data was not collected in the study we converted the CVD risk equations to CHD risks using the recommended calibration factors.[5] We present the results of the comparison for both groups.

### ***Transition probabilities***

We disaggregated the overall risk of a CVD event into rates for specific events by age and gender, using UK relative incidence rates based on published literature [7-9] and expert opinion, as previously used in Ward et al [10]. These event rates were applied to individual annual CVD risks to calculate individual transition probabilities for moving from the CVD-free

1  
2  
3  
4  
5  
6 state to the initial CVD-event states. Also, individual patients could die from non-vascular  
7 causes, depending on their age and gender. The non-CVD death transition probabilities  
8 were taken from Briggs et al.[11] Transition probabilities for moving from primary event  
9 health states to subsequent non-fatal health states are taken from Ward et al.[10]  
10  
11  
12

### 13 14 **Measuring cost**

15  
16 Data on resources used during the trial and staff contacts were recorded in case record  
17 forms and then converted into electronic format. To determine the total one-year costs for  
18 each group, we obtained unit costs for all relevant items of resources used in the trial:  
19  
20  
21

22  
23  
24 *1. Costs relating to EUROACTION programme and other contacts in primary care were*  
25 obtained from the programme facilitators and included the EUROACTION nurses costs,  
26 training costs, production of patient educational materials and any other costs  
27 associated with implementing the programme. The average time spent by staff for all  
28 patient contacts at baseline and one-year was provided by each centre. Hourly wage  
29 rates of the staff salaries and training were calculated and then applied to these various  
30 patient contacts. We costed the EUROACTION family information packs, a pocket-  
31 sized personal record card, questionnaires and group sessions that each patient in the  
32 intervention group received as part of their prevention programme.  
33  
34  
35  
36  
37  
38  
39

40  
41 Costs were applied to other contacts with health care professionals, such as GPs,  
42 outside of the intervention programme for both arms and these costs were based on  
43 national estimates of the staff salaries involved and estimates of the average time spent  
44 with the patient provided by the trial co-ordinators.  
45  
46  
47  
48

49  
50 *2. Cardiac-related drug costs.* Data was collected on patient-specific cardiac-related  
51 medications including the drug name and dose at baseline and one-year. This gave  
52 point of time information, but no start or end dates. So for each patient it was assumed  
53  
54  
55  
56

1  
2  
3  
4  
5  
6 that they would remain on the same medication at a constant dose for the entire  
7 duration e.g. from baseline to one-year. National cost estimates for the drugs were  
8 provided by trial co-ordinators from each country and were applied accordingly to the  
9 relevant dose and length of time on a patient-specific basis.  
10  
11  
12

13  
14  
15 *3. Cardiac-related procedures and tests.* During the trial, patients within both groups  
16 may have required inpatient or outpatient admissions for cardiac-related procedures, or  
17 undertaken any cardiac-related tests. The procedures were costed according to HRG  
18 episodes for each country and the other tests or bed days as simple unit costs.  
19  
20 National unit cost estimates for cardiac-related procedures and tests for each country  
21 were obtained from a database held by United BioSource Corporation (Erwin De Cock,  
22 personal communication, May 2007) for all countries, except Denmark and Poland. For  
23 these two countries, national unit cost estimates were provided from contacts within the  
24 Centre for Applied Health Services Research and Technology in Denmark (Jan  
25 Sørensen, personal communication, January 2007) and from the Ministry of Health in  
26 Poland (Andrzej Pająk, personal communication, June 2007).  
27  
28  
29  
30  
31  
32  
33  
34  
35

36 As the study was based in six countries, a costing algorithm was developed to calculate a  
37 total cost per patient for each country. The costs of the programme were valued in local  
38 currencies and then converted to 2006/2007 £ (GBP) using purchasing power parities.[12]  
39

40  
41 Table 1 presents the total one-year costs by group and country. Figure 1a shows that the 1-  
42 year observed costs (split by type of cost) for the intervention group was significantly more  
43 than the usual care group for all countries. This higher cost was explained by the  
44 EUROACTION intervention programme costs and contacts with EUROACTION staff, whilst  
45 neither arms experienced significantly high cost cardiac interventions or cardiac medications.  
46  
47  
48  
49  
50

51  
52 Subsequent costs relating to health states occupied within the model were based on UK  
53 estimates (see Appendix). It was assumed that patients in a CVD-free state would continue  
54  
55  
56  
57  
58  
59  
60

1  
2  
3  
4  
5  
6 to receive the cardiac-related medications and primary care contacts (outside of the  
7 intervention programme) that they received during the trial. The mean cost of these  
8 medications and contacts for all patients across both arms was applied to each individual  
9 patient within the model who remained in the event-free health state for subsequent years.  
10  
11  
12

### 13 14 15 **Health state utilities**

16  
17 To estimate quality-adjusted life years (QALYs) the model requires utility values for each  
18 state adjusted by age. For patients who were event-free, the utility values were based on  
19 UK general population norms [13]; utilities for events/states were taken from Ward et al [10]  
20 which were all were based on UK studies and were obtained using the EQ-5D (see  
21 Appendix).  
22  
23  
24

### 25 26 27 **Measuring the impact of the intervention**

28  
29 The study provided results only for a one-year follow-up. We estimated results for a range of  
30 possible durations of effect, assuming that the CVD risk reduction experienced by the  
31 intervention patients persisted for 0 through to 10 additional years (11-year time horizon),  
32 after which they reverted to their individual CVD risk factor levels at the start of the study  
33 (adjusted for age). For UC patients, it was assumed that patients would remain at their one-  
34 year CVD risk (adjusted annually by age) throughout the model.  
35  
36  
37  
38  
39  
40

### 41 42 **Measuring cost-effectiveness**

43  
44 Using the Markov model we calculated for each patient their expected quality-adjusted  
45 survival (based on their likelihood of surviving each cycle and their expected health state  
46 utility value) and their expected costs. Cost-effectiveness was measured in terms of the  
47 incremental cost per QALY gained (ICER). Future costs and benefits were discounted at  
48 3.5%. [14]  
49  
50  
51  
52

### 53 54 **Statistical analyses**

1  
2  
3  
4  
5  
6 All statistical analyses were performed in Stata version 10 [15] or Microsoft Excel and a p-  
7 value  $\leq 0.05$  was considered to be statistically significant. We present unadjusted and  
8 adjusted cost-effectiveness results. The adjusted results controlled for group allocation, age,  
9 gender, age\*gender interactions, country, and baseline risk factors using OLS regressions.  
10 As only a random sub-sample of UC patients were seen at baseline, regression analyses  
11 were used to predict baseline values for those patients who had missing values. For total  
12 and HDL cholesterol and SBP, OLS regression was used to predict values in those patients  
13 with missing values, as a function of age, gender and country. For the three binary variables  
14 (medications, smoking and diabetes), logistic regression models were used to predict the  
15 probability of each binary outcome. Predicted values  $\geq 0.5$  were categorised to a value of 1  
16 and values  $< 0.5$  were categorised as 0. In the adjusted models we also included an  
17 indicator for whether or not each control variable was missing.  
18  
19  
20  
21  
22  
23  
24  
25  
26  
27  
28

29 ~~Bootstrapping was undertaken on both unadjusted and adjusted costs and effects using~~  
30 ~~10,000 replications to provide 95% confidence intervals around the mean. Probabilistic~~  
31 ~~sensitivity analyses were conducted to obtain cost-effectiveness acceptability curves~~  
32 ~~(CEACs).~~  
33  
34

35  
36 We represented uncertainty due to sampling variation in both the unadjusted and adjusted  
37 cost-effectiveness ratios using non-parametric bootstrapping. In the unadjusted analyses we  
38 sampled individuals in our model with replacement and used their costs and outcomes over  
39 the 11-year period to compute replications of the incremental cost per QALY gained. We  
40 repeated this approach in the adjusted analyses, also adding the regressions to control for  
41 confounding factors. In each case, we generated 10,000 bootstrap replications of the cost-  
42 effectiveness ratios and used these to construct 95% confidence intervals around the point  
43 estimate of cost-effectiveness.  
44  
45  
46  
47  
48  
49

### 50 51 52 **Sensitivity analysis** 53 54 55 56 57 58 59 60



1  
2  
3  
4  
5  
6 The main analysis modelling was limited to ten years, in the absence of robust longer-term  
7 risk models. As a sensitivity analysis, we used a simplified longer-term model to check  
8 whether the conclusions of the main analysis would have been likely to be different if a  
9 longer-term perspective had been adopted e.g. 25 years. This model essentially assumed  
10 no further effect of the intervention but modelled out fully the possible QALY gains from the  
11 medium-term (11 year) differences in mortality and event rates.  
12  
13  
14  
15  
16  
17

## 18 Results

19  
20 The baseline characteristics for the intervention group as a whole and the usual care  
21 subsample who were seen at baseline are shown in Table 2. There were significant  
22 differences in the distribution between countries. Mean total and HDL cholesterol levels  
23 were significantly higher for the intervention compared with the UC group. Whilst no  
24 statistically significant differences were observed for other baseline characteristics, but the  
25 10-year CVD risk at baseline [5] was numerically higher for the UC group than the  
26 intervention arm.  
27  
28  
29  
30  
31  
32  
33

34 We modelled 1,019 patients in the intervention arm and 1,005 patients in the UC arm who  
35 were assessed at one-year.[4] The intervention group had fewer males than the UC group:  
36 49.8% vs. 57.4% male ( $p=0.001$ ), and was significantly younger (mean age at one-year:  
37 intervention: 61.5 years vs. usual care: 62.3 years,  $p=0.011$ ).  
38  
39  
40  
41  
42

43 When testing the validity of the Framingham risk equations to the study population we found  
44 that 8 intervention patients and 1 UC sub-sample patient experienced a CHD-event. The  
45 risk equations produced a close match, predicting 8.5 patients with a first CHD-event in the  
46 intervention group and 2.0 in the UC sub-sample.  
47  
48  
49  
50  
51

52 Figure 1b further emphasises that the observed additional costs of the EUROACTION  
53 intervention programme and staff costs were not offset by the estimated reduced costs of  
54  
55  
56  
57  
58  
59  
60

1  
2  
3  
4  
5  
6 cardiac interventions in the subsequent years. In terms of the unadjusted results, the  
7 incremental costs of the intervention are £362-£419 depending on the duration of the effect  
8 of the intervention and the incremental QALYs are 0.076-0.085 (see Table 32). As  
9 expected, the incremental costs fall and the incremental QALYs rise as the duration of the  
10 effect of the intervention beyond the end of the trial increases. The incremental cost per  
11 QALY gained range from £5,539 (95% CI £2,625-£29,627) to £4,266 (95% CI £2,059-  
12 £15,945). The unadjusted CEACs under each scenario are in Figure 24a and highlights the  
13 results in Table 32 that in all scenarios over 95% of the bootstrapped replications are less  
14 than £20,000.

15  
16  
17  
18  
19  
20  
21  
22  
23  
24 After controlling for differences in age, gender, country and baseline risk factors, the  
25 intervention is associated with higher costs and lower QALYs than the UC arm in every  
26 scenario (an example of the various regression models is shown in the Appendix). As a  
27 result, the intervention is dominated by UC. Although there is considerable uncertainty  
28 around those point estimates with the 95% confidence intervals ranging from acceptably  
29 cost-effective to highly dominated, but the probability of being cost-effective are very low, as  
30 shown in Figure 4b-2b (additional adjusted CEACs, controlling  
31 for age, gender and country only are in the Appendix). At a cost-effectiveness threshold of  
32 £20,000 the EUROACTION intervention will be cost-effective in under 6% of cases.

33  
34  
35  
36  
37  
38  
39  
40  
41 Due to baseline differences, we conducted age-sex matched subgroup analyses and the  
42 adjusted results confirmed that the intervention remained dominated, even when an  
43 optimistic timeframe was considered (an example of age-sex matched subgroup analysis is  
44 shown in the Appendix).

45  
46  
47  
48  
49  
50 The sensitivity analysis produced predictable results that in no way changed the conclusions  
51 of the analysis. Using the unadjusted data, the cost-effectiveness of the intervention was

1  
2  
3  
4  
5  
6 further enhanced, and using the adjusted data the domination of UC over the intervention  
7  
8 remained.

## 11 Discussion

13 Although this large European trial demonstrated that a nurse-coordinated preventive  
14 cardiology programme in primary care helped more high risk patients to achieve the lifestyle  
15 and risk factor targets in comparison with UC this does not appear to be cost-effective.  
16  
17

18 However, these cost-effectiveness analyses require careful qualification because they are  
19 subject to a number of uncertainties which are a consequence of the study design and  
20 important limitations in the statistical model used.  
21  
22

23  
24  
25 The differences in the adjusted and unadjusted results emphasise that the study design,  
26 based on matching pairs of general practices in each country, did not eliminate baseline  
27 differences between the two groups in cardiovascular risk factors. These differences meant  
28 that the two groups had different levels of baseline risk, higher in intervention than usual  
29 care, but the economic results have adjusted for these baseline differences. Though these  
30 differences were small in absolute terms they have a substantial effect on the estimates of  
31 absolute risk of future cardiovascular events, and therefore on the difference in effectiveness  
32 between intervention and UC. Additionally, the study recorded its primary endpoints at  
33 baseline and one-year, and to avoid 'contamination' by recording risk factor levels in UC,  
34 baseline measurements were only made in a sub-sample of UC patients. Thus, we do not  
35 have before and after measurements for 75% of the UC patients.  
36  
37  
38  
39  
40  
41  
42  
43  
44

45  
46  
47 Our cost-effectiveness analysis did not include partners. If partners were included it might  
48 improve the cost-effectiveness, but we have no good measure of the effect on partners to  
49 know how substantial the impact on the incremental cost-effectiveness ratio might be.  
50  
51  
52  
53  
54  
55  
56  
57  
58  
59  
60

Formatted: Plain Text

1  
2  
3  
4  
5  
6 Our estimates of the risk of future CVD-events are based on published risk equations.[5]  
7 These are derived from a large, well characterised cohort (8491 participants) and predict  
8 CVD risk as opposed to CHD risk alone. The C statistic for the model ranges from 0.76  
9 (men) to 0.79 (women) suggesting that additional risk factors could potentially improve the  
10 model's discriminatory power. Other risk models have included risk factors such as family  
11 history of CVD, social deprivation and biomarkers e.g. hs-CRP [16-17] although these  
12 models also have their own limitations.  
13  
14  
15  
16  
17  
18

19  
20 However, to date lifestyle factors such as dietary habits and physical inactivity although  
21 important in the aetiology of CHD [18] and independent of the other major risk factors, have  
22 not been included in such risk scores, because they are difficult to accurately quantify. The  
23 omission of these important lifestyle factors in the Framingham risk equations may be  
24 particularly relevant in our study as the cornerstone of the EUROACTION programme was  
25 lifestyle change which was clearly evident in the study's most striking achievements in this  
26 area including significantly higher fruit and vegetable consumption ( $p = 0.005$ ); physical  
27 activity levels ( $p = 0.01$ ); and weight loss ( $p = 0.005$ ).  
28  
29  
30  
31  
32  
33  
34  
35

36 It is thus possible that our estimates of relative differences in absolute risk between the  
37 groups may understate the full effects of the intervention on long-term CVD risk. However,  
38 we showed that the risk equations are able to predict CHD events in the study population in  
39 the one-year follow-up period, but the accuracy of the risk equations over the ten-year period  
40 of our study remains untested.  
41  
42  
43  
44  
45

46 Our modelling also requires an assumption about how long any differential effect of the  
47 intervention persists. Nothing is known about the longer-term effects of EUROACTION, and  
48 there are few studies that have looked at longer-term changes. The longest follow-up to a  
49 relevant life-style change appears to be the OXCHECK study which showed that the benefits  
50 of health checks were sustained over three years.[19-20] However, whatever the duration  
51  
52  
53  
54  
55  
56  
57  
58  
59  
60

1  
2  
3  
4  
5  
6 of effect beyond the trial, and even when a 25-year model was used, the policy conclusions  
7 remain the same.  
8  
9

10  
11 Finally, our model uses a regression analysis approach so that a UK specific estimate can  
12 be drawn from the complete multinational EUROACTION dataset on net resource use, costs  
13 and net effects of the intervention. The epidemiological, utilities and cost data for the longer-  
14 term modelling of risk and events is based on UK data alone. Thus, the results are  
15 applicable to the UK and not specifically to the other EUROACTION countries. Whilst formal  
16 analysis would be needed to confirm this, the coefficients on the country parameters in the  
17 regression analyses of both costs and outcomes suggest that the cost-effectiveness would  
18 be broadly similar in the other countries.  
19  
20  
21  
22  
23  
24  
25  
26

## 27 **Conclusion**

28  
29 Although the EUROACTION study demonstrated in high risk patients in primary care  
30 significant improvements in lifestyle and CVD risk factors, it is not possible to show, using  
31 the best available risk equations, that the intervention was cost-effective. The available risk  
32 modelling is based on a limited number of risk factors, which do not include diet or physical  
33 activity, and a healthier lifestyle was the most important outcome of this trial. Therefore,  
34 whether or not an intervention such as that offered by EUROACTION is cost-effective  
35 remains an open question that could be answered by a longer-term trial with major adverse  
36 cardiovascular events as the primary endpoint.  
37  
38  
39  
40  
41  
42  
43  
44  
45  
46  
47  
48  
49  
50  
51  
52  
53  
54  
55  
56  
57  
58  
59  
60

## Acknowledgements

### *EUROACTION Steering Group*

A scientific steering group approved the protocol and the design for this matched pair cluster-randomised controlled trial, and is responsible for the scientific integrity of the study.

The steering group has the following membership: D Wood (London, UK, Chairman), G De Backer (Ghent, Belgium), D De Bacquer (Ghent, Belgium), M Buxton (Uxbridge, UK), I Graham (Dublin, Ireland), A Howard (Nice, France), K Kotseva (London, UK), S Logstrup (Brussels, Belgium), H McGee (Dublin, Ireland), M Mioulet (Nice, France), K Smith (Dundee, UK), D Thompson (York, UK), T Thomsen (Glostrup, Denmark), T van der Weijden (Maastricht, the Netherlands).

### *National co-ordinators*

The national co-ordinators for each country are also members of the steering committee.

They are responsible for identifying and recruiting general practices, obtaining ethics committee approval, appointing and supervising staff in the centres and contributing scientifically to the publication of results. The EUROACTION National Co-ordinators and Primary care leaders are as follows:

Denmark: T Thomsen, K Brockelmann; Italy: P Fioretti, A Desideri, S Brusaferrò; Poland: A Pajak, K. Kawecka-Jaszcz, P Jankowski, T Grodzicki; Spain: J De Velasco, A Maiques; Netherlands: T van der Weijden; United Kingdom: D Wood, J Morrell.

### *Co-ordinating and Data Management Centre*

The Co-ordinating and Data Management Centre is the Department of Cardiovascular Medicine, National Heart and Lung Institute at Charing Cross Campus, Imperial College, London, UK (Head Professor David Wood). The following staff have specific responsibilities as described: K Kotseva, Senior Clinical Research Fellow; S Connolly, Research Fellow; C Jennings, Study Nurse Co-ordinator; A Mead, Chief Dietician; J Jones, Superintendent

1  
2  
3  
4  
5  
6 Physiotherapist; A Holden, Physical activity Co-ordinator; T Collier, Statistician; M Alston, D  
7 Charlesworth, P Homewood, K Pandya, M Somaia, IT specialists/Data managers; S Graves,  
8 Research Administrator; W Leacock, D Xenikaki, Administrative Assistants. The following  
9 experts advised the Co-ordinating Centre on dietary and physical activity assessment:  
10  
11 Professor Gary Frost, Professor Barry Margetts, Dr Mike Nelson and Dr Charlie Foster.  
12  
13  
14

#### 15 16 17 *Central Laboratory*

18 Central Laboratory analysis of total cholesterol, HDL cholesterol, triglycerides, glucose and  
19 HbA1c are undertaken by A McLelland, R Birrell and G Beastall in the Department of  
20 Pathological Biochemistry, Royal Infirmary, Glasgow (Head of Department J Shepherd).  
21  
22  
23

#### 24 25 26 *Statistical Centres*

27 The statistical analyses for the primary endpoints were undertaken by D De Bacquer,  
28 Statistician, from the Department of Public Health (Head of Department G De Backer),  
29 Ghent University, Belgium, and supplementary analyses by T Collier, Statistician,  
30 Department of Medical Statistics, London School of Hygiene and Tropical Medicine,  
31 University of London, UK.  
32  
33  
34  
35  
36  
37

#### 38 39 40 *Health Economics Centre*

41 Martin J Buxton, Professor of Health Economics and Director: Health Economics Research  
42 Group, Brunel University, UK; Hema Mistry and Matthew Dyer, Research Fellows in Health  
43 Economics, Brunel University.  
44  
45

#### 46 47 48 *Primary Care Centres*

##### 49 *Denmark*

50 Intervention Centre: Sundhedscenteret Skanderborg. Dr Lisbeth Rosborg, GP/ Practice  
51 Manager; Susanne Holck Mogensen, Nurse.  
52

53 Usual Care Centre: Gasvej 5, 8700 Horsens. Dr Henrik Zanoni, GP; Lene Henriksen, Nurse.  
54  
55  
56  
57  
58  
59  
60

1  
2  
3  
4  
5  
6  
7  
8 *Italy*

9 Intervention Centre: Rive dai Stimatinis 12, 33013 Gemona del Friuli. Dr Beppino Colle,  
10 Primary Care Intervention Coordinator; Dr Massimiliano Rugolo, Principal Investigator/GP;  
11 Tilla Gurisatti, Nurse.  
12

13 Usual Care Centre: Via S. Valentino 20, 33100 Udine. Dr Mario Casini, Italy Usual Care  
14 Coordinator. Dr Fabrizio Gangi, Italy Usual Care PI/GP. Daniela Gurisatti and Loredana  
15 Trevisani, Nurses.  
16  
17  
18  
19

20  
21  
22 *Netherlands*

23 Intervention Centre: Gezondheidscentrum Hoensbroek-Noord. Dr Martijn van Nunen and Dr  
24 Bem Bruls, GPs; Jasja Janssen, Nurse; Mrs Mathil Sanders, Practice Manager.  
25 Usual Care Centre: Dr Mieke Winten-Huisman and Dr Marc Eyck, GPs; Rene van den  
26 Heuvel and Claudia Gessing, Nurses.  
27  
28  
29  
30

31  
32 *Poland*

33 Intervention Centre: Centrum Medycyny Profilaktycznej w Krakowie. Dr Krystyna Pająk,  
34 Principal Investigator; Lidia Dwojak, Practice Manager; Joanna Śladek-Ratajewicz, GP;  
35 Barbara Waligóra and Irena Smarzyńska, Nurses.  
36 Usual Care Centre: Podstawowa Opieka Zdrowotna - Szpital Uniwersytecki w Krakowie. Dr  
37 Maria Fornal, Principal Investigator; Dr Jolanta Walczewska, GP; Barbara Wojtanis and  
38 Helena Kamińska, Nurses.  
39  
40  
41  
42  
43  
44

45  
46 *Spain*

47 Intervention Centre: Centro de Salud Salvador Pau, Valencia. Dr Jorge Navarro, Principal  
48 Investigator; Gemma Méndez Pérez, Nurse; Dr. Maria Jose Donat, Dr. Raquel Prieto, Dr.  
49 Rosario Gonzalez, Dr. Teresa Almela, Dr. Amaparo Garcia and Dr. Francisco Cortes, GPs.  
50  
51  
52  
53  
54  
55  
56  
57  
58  
59  
60



1  
2  
3  
4  
5  
6 Usual Care Centre: Centro de Salud de Manises, Valencia. Dr Lorenzo Pascual, Principal  
7 Investigador; Rocio Marco, Nurse; Dr Juan Manuel García, Practice Manager; Dr Antonia  
8 Ibañez, Dr. Cecilia Ruiz, Dr. Santos Plaza, Dr. Amparo Moreno and Dr. Carmen Lloret, GPs.  
9  
10

11  
12  
13 *UK*

14 Intervention Centre: Seaside Medical Centre, Eastbourne. Dr Tim Gietzen, Principal  
15 Investigator; Sjouke Ashton, Nurse; George Bordoli, Associate Nurse; Daniel Brookbank and  
16 Angela Hughes, Practice Managers.  
17  
18

19 Usual Care Centre: Green Street Clinic, Eastbourne. Dr Ian McNaughton, Principal  
20 Investigator; Shirley Colvin, Nurse; Heather King, Practice Manager.  
21  
22

23  
24  
25 *Acknowledgement:* EUROACTION is an initiative of the European Society of Cardiology  
26 which highlights its commitment to improve the quality of life of the European population by  
27 reducing the impact of cardiovascular diseases. The study protocol conforms to the ethical  
28 guidelines of the 1995 Declaration of Helsinki with ethics committee approval in all countries  
29 and for every centre. Written informed consent was obtained from every subject.  
30  
31

32  
33 *Competing interest statement:* All authors declare that the answer to the questions on your  
34 competing interest form [bmj.com/cgi/content/full/317/7154/291/DC1](http://bmj.com/cgi/content/full/317/7154/291/DC1) are all No and therefore  
35 have nothing to declare.  
36  
37

38  
39 *Funding:* Sponsored solely by AstraZeneca through the provision of an unconditional  
40 educational grant. [AstraZeneca had no involvement in the study design; in the collection,  
41 analysis and interpretation of the data; in the writing of the report; and in the decision to  
42 submit the paper for publication.](#)  
43  
44

45 *Author contributions:* DW and MB are part of the steering committee and approved the  
46 protocol and the design for this matched paired cluster-randomised trial. DW was  
47 responsible for the overall direction of the project. HM and MD conducted the economic  
48 analysis under the supervision of SM and MB and with guidance from DW. KK was  
49 responsible for local data collection. HM drafted the manuscript with input from all authors;  
50 all authors have approved the final manuscript and were involved in the interpretation of the  
51 results.  
52  
53  
54  
55  
56  
57  
58  
59  
60

Table 1: Observed 1-year costs for EUROACTION study (in £ GBP)

| 2006/2007 prices    | Denmark        | Italy          | Netherlands    | Poland         | Spain          | UK             | Total          |
|---------------------|----------------|----------------|----------------|----------------|----------------|----------------|----------------|
| <b>Intervention</b> |                |                |                |                |                |                |                |
| N                   | 104            | 165            | 191            | 234            | 199            | 126            | 1,019          |
| Mean (SD)           | £589 (£379)    | £595 (£366)    | £756 (£466)    | £515 (£179)    | £588 (£269)    | £625 (£181)    | £608 (£329)    |
| Median              | £541           | £562           | £704           | £463           | £550           | £594           | £560           |
| IQR                 | £473 to £614   | £451 to £680   | £546 to £862   | £374 to £616   | £420 to £714   | £530 to £729   | £449 to £714   |
| Range               | £268 to £4,054 | £179 to £3,733 | £166 to £5,064 | £282 to £1,578 | £139 to £1,669 | £163 to £1,206 | £139 to £5,064 |
| <b>Usual Care</b>   |                |                |                |                |                |                |                |
| N                   | 154            | 194            | 123            | 160            | 193            | 181            | 1,005          |
| Mean (SD)           | £295 (£490)    | £201 (£365)    | £246 (£307)    | £159 (£167)    | £138 (£207)    | £307 (£563)    | £221 (£384)    |
| Median              | £193           | £146           | £125           | £105           | £68            | £196           | £142           |
| IQR                 | £152 to £275   | £104 to £198   | £84 to £250    | £84 to £159    | £56 to £122    | £140 to £303   | £90 to £225    |
| Range               | £98 to £3,364  | £70 to £4,455  | £65 to £2,806  | £60 to £1,255  | £40 to £2,173  | £73 to £6,500  | £40 to £6,500  |

**Table 2: Baseline characteristics**

Formatted: Font: 11 pt

Formatted Table

|                                                                                        | <u>Intervention</u><br>(n= 1,019) | <u>Usual care</u><br>subsample<br>(n = 252) | <u>Statistical test</u> <sup>#</sup> |
|----------------------------------------------------------------------------------------|-----------------------------------|---------------------------------------------|--------------------------------------|
| <u>Country</u>                                                                         |                                   |                                             |                                      |
| <u>Denmark</u>                                                                         | <u>104 (10.2%)</u>                | <u>40 (15.9%)</u>                           | <u>p = 0.012</u>                     |
| <u>Italy</u>                                                                           | <u>165 (16.2%)</u>                | <u>47 (18.7%)</u>                           |                                      |
| <u>Netherlands</u>                                                                     | <u>191 (18.7%)</u>                | <u>37 (14.7%)</u>                           |                                      |
| <u>Poland</u>                                                                          | <u>234 (23.0%)</u>                | <u>45 (17.9%)</u>                           |                                      |
| <u>Spain</u>                                                                           | <u>199 (19.5%)</u>                | <u>41 (16.3%)</u>                           |                                      |
| <u>UK</u>                                                                              | <u>126 (12.4%)</u>                | <u>42 (16.7%)</u>                           |                                      |
| <u>Gender</u>                                                                          |                                   |                                             |                                      |
| <u>Male</u>                                                                            | <u>507 (49.8%)</u>                | <u>133 (52.8%)</u>                          | <u>p = 0.390</u>                     |
| <u>Female</u>                                                                          | <u>512 (50.3%)</u>                | <u>119 (47.2%)</u>                          |                                      |
| <u>Risk factors required for the</u><br><u>D'Agostino Equation [5]</u><br><u>n (%)</u> |                                   |                                             |                                      |
| <u>Non-smoker</u>                                                                      | <u>695 (68.2%)</u>                | <u>155 (61.5%)</u>                          | <u>p = 0.646</u>                     |
| <u>Has diabetes</u>                                                                    | <u>313 (30.7%)</u>                | <u>68 (27.0%)</u>                           | <u>p = 0.247</u>                     |
| <u>On anti-hypertensive drugs</u>                                                      | <u>432 (42.4%)</u>                | <u>97 (38.5%)</u>                           | <u>p = 0.260</u>                     |
| <u>Mean (SD)</u>                                                                       |                                   |                                             |                                      |
| <u>Age</u>                                                                             | <u>60.5 (7.6)</u>                 | <u>60.4 (7.3)</u>                           | <u>p = 0.915</u>                     |
| <u>Systolic blood pressure (mm HG)</u>                                                 | <u>141.1 (18.6)</u>               | <u>141.6 (18.9)</u>                         | <u>p = 0.693</u>                     |
| <u>Total cholesterol (mmol/L)</u>                                                      | <u>5.70 (1.02)</u>                | <u>5.45 (0.99)</u>                          | <u>p = 0.001</u>                     |
| <u>HDL cholesterol (mmol/L)</u>                                                        | <u>1.40 (0.39)</u>                | <u>1.35 (0.36)</u>                          | <u>p = 0.047</u>                     |
| <u>10-year CVD risk at baseline</u>                                                    | <u>0.115 (0.087)</u>              | <u>0.120 (0.093)</u>                        | <u>p = 0.426</u>                     |

<sup>#</sup> Chi-squared tests conducted for categorical variables and t tests conducted for continuous variables

Table 32: Results from cost-effectiveness model

|                                   | Duration of effect of intervention beyond the end of the trial (model time horizon = 11 <sup>th</sup> years in all cases) |                          |                          |                          |
|-----------------------------------|---------------------------------------------------------------------------------------------------------------------------|--------------------------|--------------------------|--------------------------|
|                                   | 0 years                                                                                                                   | 2 years                  | 5 years                  | 10 years                 |
| <b>Unadjusted costs and QALYs</b> |                                                                                                                           |                          |                          |                          |
| Usual care mean cost (SD)         | £2,727 (£29)                                                                                                              | £2,727 (£29)             | £2,727 (£29)             | £2,727 (£29)             |
| Intervention mean cost (SD)       | £3,146 (£33)                                                                                                              | £3,126 (£31)             | £3,105 (£31)             | £3,089 (£31)             |
| Usual care mean QALYs (SD)        | 6.755 (0.021)                                                                                                             | 6.755 (0.021)            | 6.755 (0.021)            | 6.755 (0.021)            |
| Intervention mean QALYs (SD)      | 6.831 (0.021)                                                                                                             | 6.835 (0.021)            | 6.838 (0.021)            | 6.840 (0.021)            |
| Incremental costs (95% CI)        | £419 (£332 to £505)                                                                                                       | £399 (£315 to £483)      | £378 (£294 to £462)      | £362 (£278 to £447)      |
| Incremental QALYs (95% CI)        | 0.076 (0.017 to 0.135)                                                                                                    | 0.079 (0.020 to 0.138)   | 0.083 (0.024 to 0.142)   | 0.085 (0.026 to 0.144)   |
| ICER                              | £5,539                                                                                                                    | £5,031                   | £4,561                   | £4,266                   |
| 95% CI                            | £2,625 to £29,627                                                                                                         | £2,412 to £22,520        | £2,202 to £18,155        | £2,059 to £15,945        |
| % of bootstrapped ICERs < £20k    | 95.7%                                                                                                                     | 97.0%                    | 97.9%                    | 98.4%                    |
| % of bootstrapped ICERs < £30k    | 97.6%                                                                                                                     | 98.4%                    | 99.0%                    | 99.2%                    |
| <b>Adjusted costs and QALYs†</b>  |                                                                                                                           |                          |                          |                          |
| Incremental costs (95% CI)        | £474 (£368 to £580)                                                                                                       | £463 (£358 to £568)      | £450 (£343 to £557)      | £441 (£331 to £550)      |
| Incremental QALYs (95% CI)        | -0.009 (-0.041 to 0.023)                                                                                                  | -0.007 (-0.038 to 0.025) | -0.005 (-0.036 to 0.027) | -0.003 (-0.035 to 0.029) |
| ICER                              | Dominated†                                                                                                                | Dominated†               | Dominated†               | Dominated†               |
| 95% CI                            | £21,695 to dominated†                                                                                                     | £18,495 to dominated†    | £15,908 to dominated†    | £14,485 to dominated†    |

|                               |       |       |       |        |
|-------------------------------|-------|-------|-------|--------|
| % of bootstrapped ICERs <£20k | 1.97% | 3.16% | 4.57% | 5.76%  |
| % of bootstrapped ICERs <£30k | 5.05% | 6.98% | 9.42% | 11.54% |

SD = standard deviation; QALYs = quality-adjusted life years; ICER = incremental cost-effectiveness ratio; CI = confidence interval

<sup>#</sup> 1 year study follow-up period plus a 10 year model

† The intervention is more costly and yield fewer QALYs than usual care

‡ Adjusting for the following baseline characteristics: age, gender, age\*gender, country, total and HDL cholesterol, SBP, anti-hypertensive medications, smoking and diabetes.

**Figure 1a: One-year observed costs for the Intervention and Usual Care groups split by type**

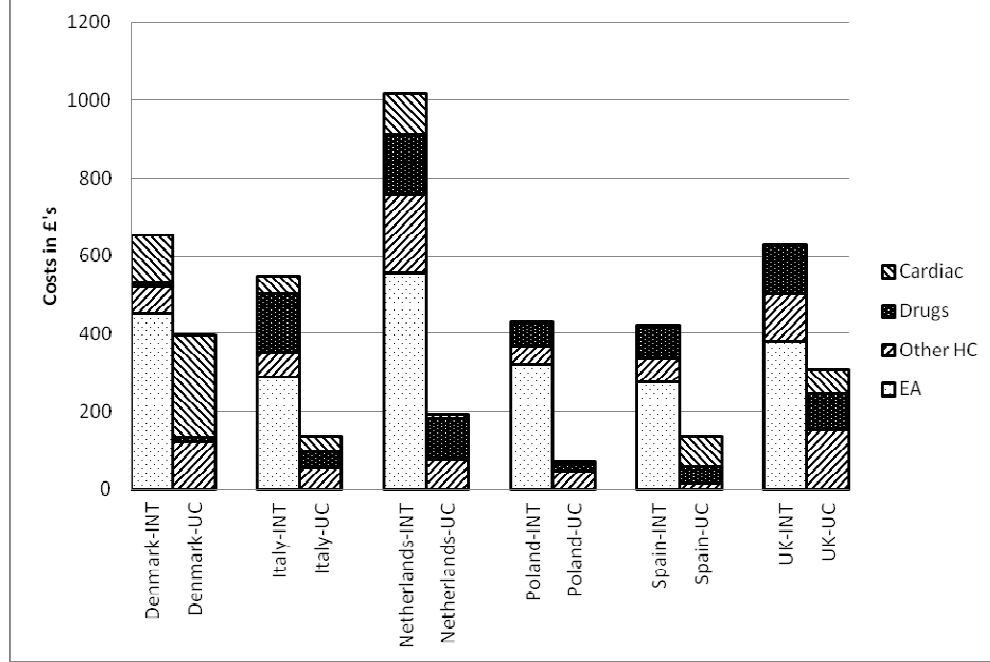

Key: EA = EuroAction costs; Other HC = other health care costs; Drugs = cardiac related medication costs; Cardiac = cardiac procedure costs

**Figure 1b: Mean costs for the Intervention and Usual Care groups for the main health states in the Markov model**

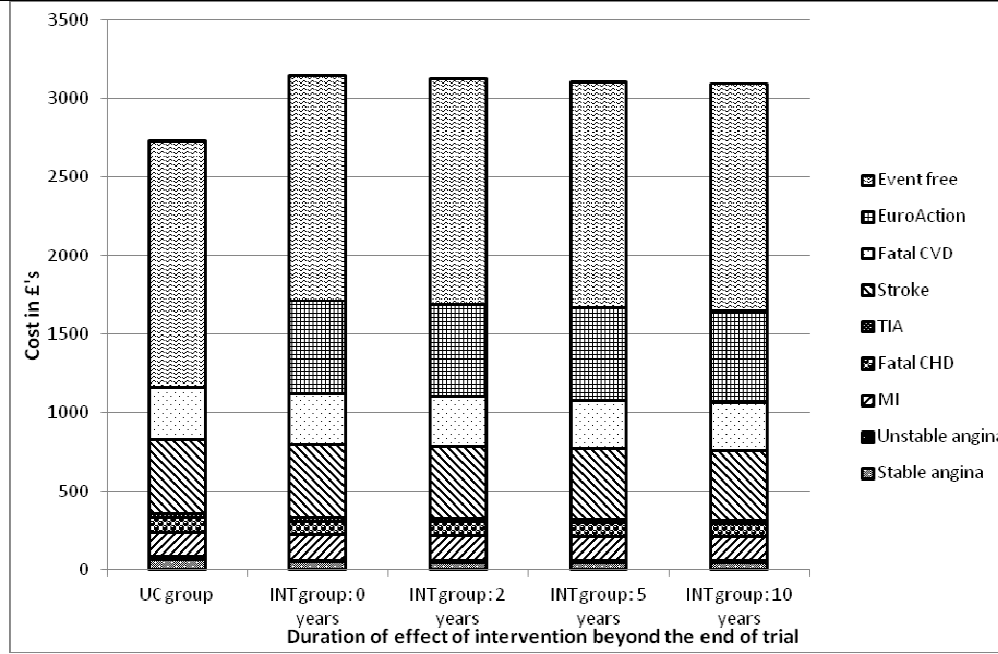

Figure 21: Cost-effectiveness acceptability curves

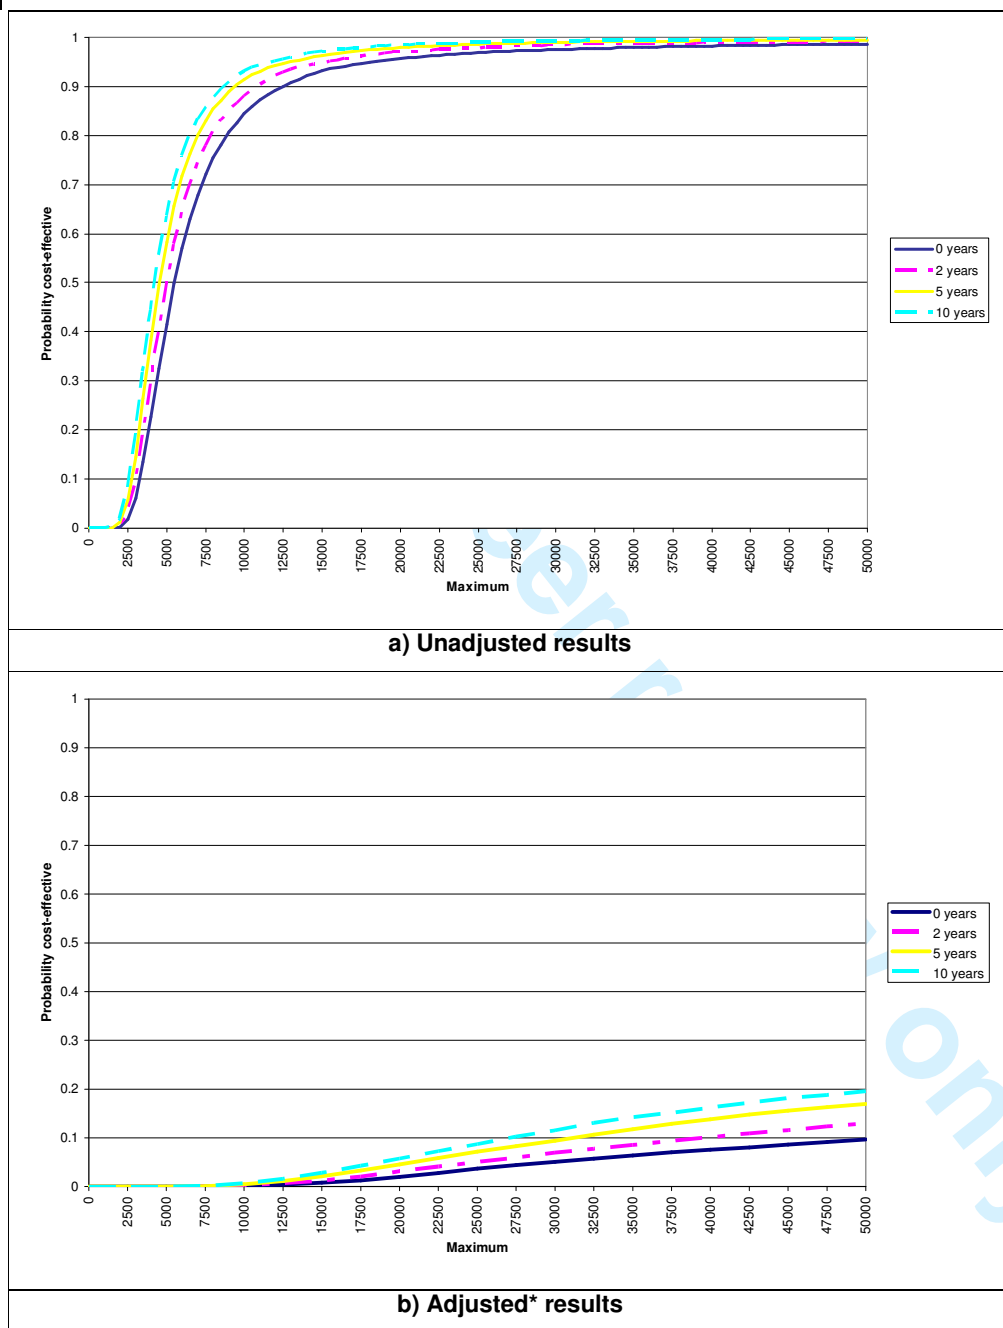

\* Adjusted for differences between groups by age, gender, country and baseline risk factors

## References

1. Graham I, Atar D, Borch-Johnsen K, et al. European guidelines on cardiovascular disease prevention in clinical practice: executive summary. Fourth Joint Task Force of the European Society of Cardiology and Other Societies on Cardiovascular Disease Prevention in Clinical Practice (Constituted by representatives of nine societies and by invited experts). *Eur Heart J* 2007;28:2375-2414.
2. Kotseva K, Wood D, De Backer G, De Bacquer D, Pyörälä K, Reiner Z, Keil U, on behalf of the EUROASPIRE Study Group. EUROASPIRE III. Management of cardiovascular risk factors in asymptomatic high-risk patients in general practice: cross-sectional survey in 12 European countries. *Eur J Cardiovasc Prev Rehabil* 2010;17:530-540.
3. Wood DA, Kotseva K, Jennings C, et al on behalf of the EUROACTION Study Group. EUROACTION: A European Society of Cardiology demonstration project in preventive cardiology. *Eur Heart J* 2004;6(Supplement J):J3-J15.
4. Wood DA, Kotseva K, Connolly S, et al. Nurse-coordinated multidisciplinary, family-based cardiovascular disease prevention programme (EUROACTION) for patients with coronary heart disease and asymptomatic individuals at high risk of cardiovascular disease: a paired, cluster-randomised controlled trial. *Lancet* 2008;371:1999-2012.
5. D'Agostino RB, Vasan RS, Pencina MJ et al. General cardiovascular risk profile for use in primary care. The Framingham Heart Study. *Circulation* 2008;117:743-53.
6. Miller DK, Homan SM. Determining transition probabilities: confusion and suggestion. *Med Decis Making* 1994;14:52-8.



- 1  
2  
3  
4  
5  
6  
7  
8 7. Sutcliffe SJ, Fox KF, Wood DA, et al. Incidence of coronary heart disease in a health  
9 authority in London: review of a community register. *BMJ* 2003;326:20.  
10
- 11  
12  
13 8. Bamford J, Sandercock P, Dennis M, et al. A prospective study of acute  
14 cerebrovascular disease in the community: the Oxfordshire Community Stroke  
15 Project 1981–86. I. Methodology, demography and incident cases of first-ever stroke.  
16  
17 *J Neurol Neurosurg Psychiatry* 1988;51:1373–80.  
18  
19
- 20  
21  
22 9. Dennis MS, Bamford JM, Sandercock PA, Warlow CP. Incidence of transient  
23 ischemic attacks in Oxfordshire, England. *Stroke* 1989;20:333–9.  
24  
25
- 26  
27  
28 10. Ward S, Lloyd Jones M, Pandor A, et al. A systematic review and economic  
29 evaluation of statins for the prevention of coronary events. *Health Technology*  
30 *Assessment* 2007;11(14).  
31  
32
- 33  
34  
35 11. Briggs A, Mihaylova B, Sculpher M, et al. Cost-effectiveness of perindopril in  
36 reducing cardiovascular events in patients with stable coronary artery disease using  
37 data from the EUROPA study. *Heart* 2007;93:1081-6.  
38  
39
- 40  
41  
42 12. Organisation for Economic Co-operation and Development (OECD CPI). OECD  
43 Consumer Price Indices. July 2007. Available at: <http://www.oecd.org/>  
44  
45
- 46  
47  
48 13. Kind P, Dolan P, Gudex C, Williams A. Variations in population health status: results  
49 from a United Kingdom national questionnaire survey. *BMJ* 1998;316:736–41.  
50  
51
- 52  
53  
54 14. National Institute for Health and Clinical Excellence (NICE). Guide to methods of  
55 technology appraisal. London, June 2008.  
56  
57

- 1  
2  
3  
4  
5  
6  
7  
8 15. StataCorp. Stata Statistical Software: Release 10.0. College Station, Texas, USA:  
9 Stata Corporation, 2007.  
10  
11  
12  
13 16. Ridker PM, Buring JE, Rifai N, Cook NR. Development and validation of improved  
14 algorithms for the assessment of global cardiovascular risk in women: the Reynolds  
15 Risk Score. *JAMA* 2007;297:611-9.  
16  
17  
18  
19  
20 17. Woodward M, Brindle P, Tunstall-Pedoe H. SIGN group on risk estimation. Adding  
21 social deprivation and family history to cardiovascular risk assessment: the ASSIGN  
22 score from the Scottish Heart Health Extended Cohort (SHHEC). *Heart* 2007;93:172-  
23 6.  
24  
25  
26  
27  
28  
29 18. Yusuf S, Hawken S, Ounpuu S, et al. Effect of potentially modifiable risk factors  
30 associated with myocardial infarction in 52 countries (the INTERHEART study): case-  
31 control study. *Lancet* 2004;364:937-52.  
32  
33  
34  
35  
36 19. Fleming P, Godwin M. Lifestyle interventions in primary care: systematic review of  
37 randomized controlled trials. *Can Fam Physician* 2008;54:1706-13  
38  
39  
40  
41 20. Imperial Cancer Research Fund OXCHECK Study Group. Effectiveness of health  
42 checks conducted by nurses in primary care: final results of the OXCHECK study.  
43  
44  
45 *BMJ* 1995;310:1099-1104  
46  
47  
48  
49  
50  
51  
52  
53  
54  
55  
56  
57  
58  
59  
60

## Appendix

Table A1: Costs of health states in cost-effectiveness model

| Health State         | Cost (2006 prices) | Assumption/Source                                                                                                                                                                               | Source                  |
|----------------------|--------------------|-------------------------------------------------------------------------------------------------------------------------------------------------------------------------------------------------|-------------------------|
| Event-Free           | £197               | Based on a mean cost of cardiac-related medication and health care contacts (outside of EUROACTION programme) incurred by all patients during one year follow-up                                | Trial data              |
| Stable Angina        | £383               | Based on 3 times 15 minutes' GP contact plus medication (plus cost of event-free)                                                                                                               | Ward et al, 2007 [10]   |
| Post-stable angina   | £383               | Based on 3 times 15 minutes' GP contact plus medication costs (plus cost of event-free)                                                                                                         | Ward et al, 2007 [10]   |
| Unstable angina      | £674               | Based on 3 times 15 minutes' GP contact plus medication plus 60% of patients are also prescribed clopidogrel (plus cost of event-free)                                                          | Ward et al, 2007 [10]   |
| Post-unstable angina | £383               | Based on 3 times 15 minutes' GP contact plus medication costs (plus cost of event-free)                                                                                                         | Ward et al, 2007 [10]   |
| MI                   | £5,020             | Based on data from Nottingham Heart Attack Register include revascularisation for a proportion of patients, plus primary care and medication costs as unstable angina (plus cost of event-free) | Palmer et al, 2002 [21] |
| Post-MI              | £383               | Based on 3 times 15 minutes' GP contact plus medication costs (plus cost of event-free)                                                                                                         | Ward et al, 2007 [10]   |
| Fatal CHD event      | £1,462             | Based on costs of a fatal MI (plus cost of event-free)                                                                                                                                          | Clarke et al, 2003 [22] |
| TIA                  | £1,351             | Based on medication costs plus costs of test and surgery for appropriate patients (plus cost of event-free)                                                                                     | Ward et al, 2007 [10]   |
| Post-TIA             | £483               | Based on medication costs only (plus cost of event-free)                                                                                                                                        | Ward et al, 2007 [10]   |

|                 |        |                                                                                                                                                |                         |
|-----------------|--------|------------------------------------------------------------------------------------------------------------------------------------------------|-------------------------|
| Stroke          | £8,922 | Based on cost of acute events (mild, moderate and severe stroke) and weighted by distribution of severity of strokes (plus cost of event-free) | Youman et al, 2003 [23] |
| Post-Stroke     | £2,543 | Based on cost of acute events (mild, moderate and severe stroke) and weighted by distribution of severity of strokes (plus cost of event-free) | Youman et al, 2003 [23] |
| Fatal CVD event | £7,832 | Based on cost of fatal stroke (plus cost of event-free)                                                                                        | Youman et al, 2003 [23] |

**Table A2: Utility values for health states used in the model**

| Utility value | Event free | Stable angina | Unstable angina | MI    | TIA   | Stroke |
|---------------|------------|---------------|-----------------|-------|-------|--------|
| 45 - 49       | 0.869      | 0.702         | 0.669           | 0.660 | 0.869 | 0.547  |
| 50 - 54       | 0.848      | 0.685         | 0.653           | 0.644 | 0.848 | 0.533  |
| 55 - 59       | 0.826      | 0.667         | 0.636           | 0.628 | 0.826 | 0.520  |
| 60 - 64       | 0.805      | 0.650         | 0.620           | 0.612 | 0.805 | 0.506  |
| 65 - 69       | 0.784      | 0.633         | 0.604           | 0.596 | 0.784 | 0.493  |
| 70 - 74       | 0.763      | 0.617         | 0.588           | 0.580 | 0.763 | 0.480  |
| 75 - 79       | 0.741      | 0.599         | 0.571           | 0.563 | 0.741 | 0.466  |
| 80 - 84       | 0.720      | 0.582         | 0.544           | 0.547 | 0.720 | 0.453  |
| 85 - 89       | 0.699      | 0.565         | 0.538           | 0.531 | 0.699 | 0.440  |
| 90 - 94       | 0.678      | 0.548         | 0.522           | 0.515 | 0.678 | 0.426  |
| 95 - 99       | 0.656      | 0.530         | 0.505           | 0.499 | 0.656 | 0.413  |
| 100 +         | 0.635      | 0.513         | 0.489           | 0.483 | 0.635 | 0.399  |

Sources: Event free (Kind et al, 1998) [13]; Stable angina (Meslop et al, 2003) [24]; Unstable angina and MI (Goodacre et al, 2004) [25]; TIA (Kind et al, 1998) [13]; Stroke (Tengs et al, 2003) [26]

1  
2  
3  
4  
5  
6  
7  
8  
9  
10  
11  
12  
13  
14  
15  
16  
17  
18  
19  
20  
21  
22  
23  
24  
25  
26  
27  
28  
29  
30  
31  
32  
33  
34  
35  
36  
37  
38  
39  
40  
41  
42  
43  
44  
45  
46  
47  
48  
49

**Table A3: Regression results from adjusted<sup>#</sup> cost-effectiveness analysis (Duration of effect of intervention beyond the end of the trial = 0 years)**

|                                            | <b>Costs</b>       |                       |              |                   | <b>QALYs</b>       |                       |               |                   |
|--------------------------------------------|--------------------|-----------------------|--------------|-------------------|--------------------|-----------------------|---------------|-------------------|
|                                            | <u>Coefficient</u> | <u>Standard error</u> | <u>t</u>     | <u>p value</u>    | <u>Coefficient</u> | <u>Standard error</u> | <u>t</u>      | <u>p value</u>    |
| <u>Group</u><br>(1 = intervention; 0 = UC) | <u>474.40</u>      | <u>54.04</u>          | <u>8.78</u>  | <u>&lt; 0.001</u> | <u>-0.009</u>      | <u>0.016</u>          | <u>-0.56</u>  | <u>0.575</u>      |
| <u>Gender</u>                              | <u>1544.10</u>     | <u>273.27</u>         | <u>5.65</u>  | <u>&lt; 0.001</u> | <u>-0.826</u>      | <u>0.082</u>          | <u>-10.09</u> | <u>&lt; 0.001</u> |
| <u>Age</u>                                 | <u>57.68</u>       | <u>3.24</u>           | <u>17.80</u> | <u>&lt; 0.001</u> | <u>-0.090</u>      | <u>0.001</u>          | <u>-92.79</u> | <u>&lt; 0.001</u> |
| <u>Gender*Age</u>                          | <u>-33.11</u>      | <u>4.45</u>           | <u>-7.44</u> | <u>&lt; 0.001</u> | <u>0.017</u>       | <u>0.001</u>          | <u>13.12</u>  | <u>&lt; 0.001</u> |
| <u>Italy</u>                               | <u>106.34</u>      | <u>58.58</u>          | <u>1.82</u>  | <u>0.070</u>      | <u>-0.022</u>      | <u>0.018</u>          | <u>-1.26</u>  | <u>0.206</u>      |
| <u>Spain</u>                               | <u>89.71</u>       | <u>60.31</u>          | <u>1.49</u>  | <u>0.137</u>      | <u>-0.041</u>      | <u>0.018</u>          | <u>-2.26</u>  | <u>0.024</u>      |
| <u>Poland</u>                              | <u>32.58</u>       | <u>58.81</u>          | <u>0.55</u>  | <u>0.580</u>      | <u>-0.045</u>      | <u>0.018</u>          | <u>-2.56</u>  | <u>0.010</u>      |
| <u>Denmark</u>                             | <u>188.87</u>      | <u>62.34</u>          | <u>3.03</u>  | <u>0.002</u>      | <u>-0.063</u>      | <u>0.019</u>          | <u>-3.38</u>  | <u>0.001</u>      |
| <u>Netherlands</u>                         | <u>162.83</u>      | <u>61.34</u>          | <u>2.65</u>  | <u>0.008</u>      | <u>-0.058</u>      | <u>0.018</u>          | <u>-3.17</u>  | <u>0.002</u>      |
| <u>Total cholesterol</u>                   | <u>3.64</u>        | <u>0.58</u>           | <u>6.24</u>  | <u>&lt; 0.001</u> | <u>-0.001</u>      | <u>0.000</u>          | <u>-4.32</u>  | <u>&lt; 0.001</u> |
| <u>HDL cholesterol</u>                     | <u>-13.76</u>      | <u>1.57</u>           | <u>-8.77</u> | <u>&lt; 0.001</u> | <u>0.002</u>       | <u>0.000</u>          | <u>4.29</u>   | <u>&lt; 0.001</u> |
| <u>Systolic blood pressure</u>             | <u>13.38</u>       | <u>1.20</u>           | <u>11.19</u> | <u>&lt; 0.001</u> | <u>-0.002</u>      | <u>0.000</u>          | <u>-4.70</u>  | <u>&lt; 0.001</u> |
| <u>Anti-hypertensive drugs</u>             | <u>346.22</u>      | <u>41.47</u>          | <u>8.35</u>  | <u>&lt; 0.001</u> | <u>-0.051</u>      | <u>0.012</u>          | <u>-4.12</u>  | <u>&lt; 0.001</u> |
| <u>Diabetes</u>                            | <u>588.88</u>      | <u>46.62</u>          | <u>12.63</u> | <u>&lt; 0.001</u> | <u>-0.116</u>      | <u>0.014</u>          | <u>-8.35</u>  | <u>&lt; 0.001</u> |
| <u>Smoking</u>                             | <u>392.41</u>      | <u>43.48</u>          | <u>9.02</u>  | <u>&lt; 0.001</u> | <u>-0.055</u>      | <u>0.013</u>          | <u>-4.20</u>  | <u>&lt; 0.001</u> |

1  
2  
3  
4  
5  
6  
7  
8  
9  
10  
11  
12  
13  
14  
15  
16  
17  
18  
19  
20  
21  
22  
23  
24  
25  
26  
27  
28  
29  
30  
31  
32  
33  
34  
35  
36  
37  
38  
39  
40  
41  
42  
43  
44  
45  
46  
47  
48  
49

|                                 |                 |               |               |                   |               |              |               |                   |
|---------------------------------|-----------------|---------------|---------------|-------------------|---------------|--------------|---------------|-------------------|
| <u>Total cholesterol*</u>       | <u>-362.52</u>  | <u>544.24</u> | <u>-0.67</u>  | <u>0.505</u>      | <u>0.037</u>  | <u>0.163</u> | <u>0.22</u>   | <u>0.823</u>      |
| <u>HDL cholesterol*</u>         | <u>238.80</u>   | <u>536.53</u> | <u>0.45</u>   | <u>0.656</u>      | <u>0.023</u>  | <u>0.161</u> | <u>0.15</u>   | <u>0.884</u>      |
| <u>Systolic blood pressure*</u> | <u>157.56</u>   | <u>232.32</u> | <u>0.68</u>   | <u>0.498</u>      | <u>-0.066</u> | <u>0.070</u> | <u>-0.94</u>  | <u>0.346</u>      |
| <u>Anti-hypertensive drugs*</u> | <u>230.88</u>   | <u>143.30</u> | <u>1.61</u>   | <u>0.107</u>      | <u>-0.046</u> | <u>0.043</u> | <u>-1.07</u>  | <u>0.284</u>      |
| <u>Smoking*</u>                 | <u>-302.10</u>  | <u>226.48</u> | <u>-1.33</u>  | <u>0.182</u>      | <u>0.044</u>  | <u>0.068</u> | <u>0.65</u>   | <u>0.513</u>      |
| <u>Constant</u>                 | <u>-3068.89</u> | <u>280.08</u> | <u>-10.96</u> | <u>&lt; 0.001</u> | <u>12.572</u> | <u>0.084</u> | <u>149.96</u> | <u>&lt; 0.001</u> |
| Number of observations          | <u>2,024</u>    |               |               |                   | <u>2,024</u>  |              |               |                   |
| R <sup>2</sup>                  | <u>0.472</u>    |               |               |                   | <u>0.896</u>  |              |               |                   |

\* Regression model adjusting for the following baseline characteristics: age, gender, age\*gender, country, total and HDL cholesterol, SBP, anti-hypertensive medications, smoking and diabetes.

\* Dummy variables created to indicate missing values for each of the risk characteristics

Formatted: Font: Not Bold  
Formatted: Line spacing: single

**Table A43: Additional results from the cost-effectiveness model**

|                                                | Duration of effect of intervention beyond the end of the trial (model time horizon = 11 <sup>#</sup> years in all cases) |                          |                          |                          |
|------------------------------------------------|--------------------------------------------------------------------------------------------------------------------------|--------------------------|--------------------------|--------------------------|
|                                                | 0 years                                                                                                                  | 2 years                  | 5 years                  | 10 years                 |
| <b>Adjusted costs and QALYs</b>                |                                                                                                                          |                          |                          |                          |
| <i>Controlling for age and gender only</i>     |                                                                                                                          |                          |                          |                          |
| Incremental costs (95% CI)                     | £512 (£438 to £589)                                                                                                      | £491 (£418 to £563)      | £468 (£396 to £541)      | £452 (£378 to £525)      |
| Incremental QALYs (95% CI)                     | -0.016 (-0.036 to 0.004)                                                                                                 | -0.012 (-0.032 to 0.008) | -0.008 (-0.028 to 0.012) | -0.006 (-0.026 to 0.014) |
| ICER                                           | Dominated†                                                                                                               | Dominated†               | Dominated†               | Dominated†               |
| 95% CI                                         | £105,653 to dominated†                                                                                                   | £54,307 to dominated†    | £34,845 to dominated†    | £27,907 to dominated†    |
| % of bootstrapped ICERs <£20k                  | 0.01%                                                                                                                    | 0.10%                    | 0.34%                    | 0.71%                    |
| % of bootstrapped ICERs <£30k                  | 0.19%                                                                                                                    | 0.52%                    | 1.69%                    | 3.11%                    |
| <i>Controlling for age, gender and country</i> |                                                                                                                          |                          |                          |                          |
| Incremental costs (95% CI)                     | £497 (£424 to £571)                                                                                                      | £476 (£404 to £548)      | £453 (£381 to £526)      | £436 (£364 to £509)      |
| Incremental QALYs (95% CI)                     | -0.011 (-0.031 to 0.009)                                                                                                 | -0.007 (-0.027 to 0.013) | -0.003 (-0.023 to 0.017) | -0.001 (-0.021 to 0.019) |
| ICER                                           | Dominated†                                                                                                               | Dominated†               | Dominated†               | Dominated†               |
| 95% CI                                         | £49,903 to dominated†                                                                                                    | £33,290 to dominated†    | £24,001 to dominated†    | £20,342 to dominated†    |
| % of bootstrapped ICERs <£20k                  | 0.07%                                                                                                                    | 0.34%                    | 1.11%                    | 2.32%                    |
| % of bootstrapped ICERs <£30k                  | 0.61%                                                                                                                    | 1.81%                    | 4.78%                    | 7.76%                    |

SD = standard deviation; QALYs = quality-adjusted life years; ICER = incremental cost-effectiveness ratio; CI = confidence interval

<sup>#</sup> 1 year study follow-up period plus a 10 year model

† The intervention is more costly and yield fewer QALYs than usual care



**Table A5: Results from matched age-sex analysis**

|                                   | <b>Duration of effect of intervention beyond the end of the trial = 10 years (model time horizon = 11<sup>#</sup> years in all cases)</b> |                           |                            |                              |
|-----------------------------------|-------------------------------------------------------------------------------------------------------------------------------------------|---------------------------|----------------------------|------------------------------|
|                                   | <b>Men &lt; 65 years</b>                                                                                                                  | <b>Men &gt;= 65 years</b> | <b>Women &lt; 65 years</b> | <b>Women &gt; = 65 years</b> |
| <b>Unadjusted costs and QALYs</b> |                                                                                                                                           |                           |                            |                              |
| Incremental costs (95% CI)        | £413 (£290 to £536)                                                                                                                       | £527 (£237 to £817)       | £387 (£304 to £471)        | £546 (£376 to £717)          |
| Incremental QALYs (95% CI)        | 0.040 (-0.016 to 0.096)                                                                                                                   | -0.057 (-0.181 to 0.068)  | 0.026 (-0.017 to 0.069)    | -0.043 (-0.139 to 0.052)     |
| ICER                              | £10,298                                                                                                                                   | Dominated†                | £15,006                    | Dominated†                   |
| <b>Adjusted costs and QALYs‡</b>  |                                                                                                                                           |                           |                            |                              |
| Incremental costs (95% CI)        | £457 (£282 to £631)                                                                                                                       | £360 (£83 to £803)        | £430 (£313 to £548)        | £466 (£222 to £710)          |
| Incremental QALYs (95% CI)        | -0.008 (-0.063 to 0.048)                                                                                                                  | -0.014 (-0.212 to 0.183)  | -0.011 (-0.041 to 0.020)   | -0.000 (-0.052 to 0.051)     |
| ICER                              | Dominated†                                                                                                                                | Dominated†                | Dominated†                 | Dominated†                   |

SD = standard deviation; QALYs = quality-adjusted life years; ICER = incremental cost-effectiveness ratio; CI = confidence interval

<sup>#</sup> 1 year study follow-up period plus a 10 year model

† The intervention is more costly and yield fewer QALYs than usual care

‡ Adjusting for the following baseline characteristics: age, gender, age\*gender, country, total and HDL cholesterol, SBP, anti-hypertensive medications, smoking and diabetes.

1  
2  
3  
4  
5  
6  
7  
8  
9  
10  
11  
12  
13  
14  
15  
16  
17  
18  
19  
20  
21  
22  
23  
24  
25  
26  
27  
28  
29  
30  
31  
32  
33  
34  
35  
36  
37  
38  
39  
40  
41  
42  
43  
44  
45  
46  
47  
48  
49  
50  
51  
52  
53  
54  
55  
56  
57  
58  
59  
60

Figure A1: Adjusted cost-effectiveness results

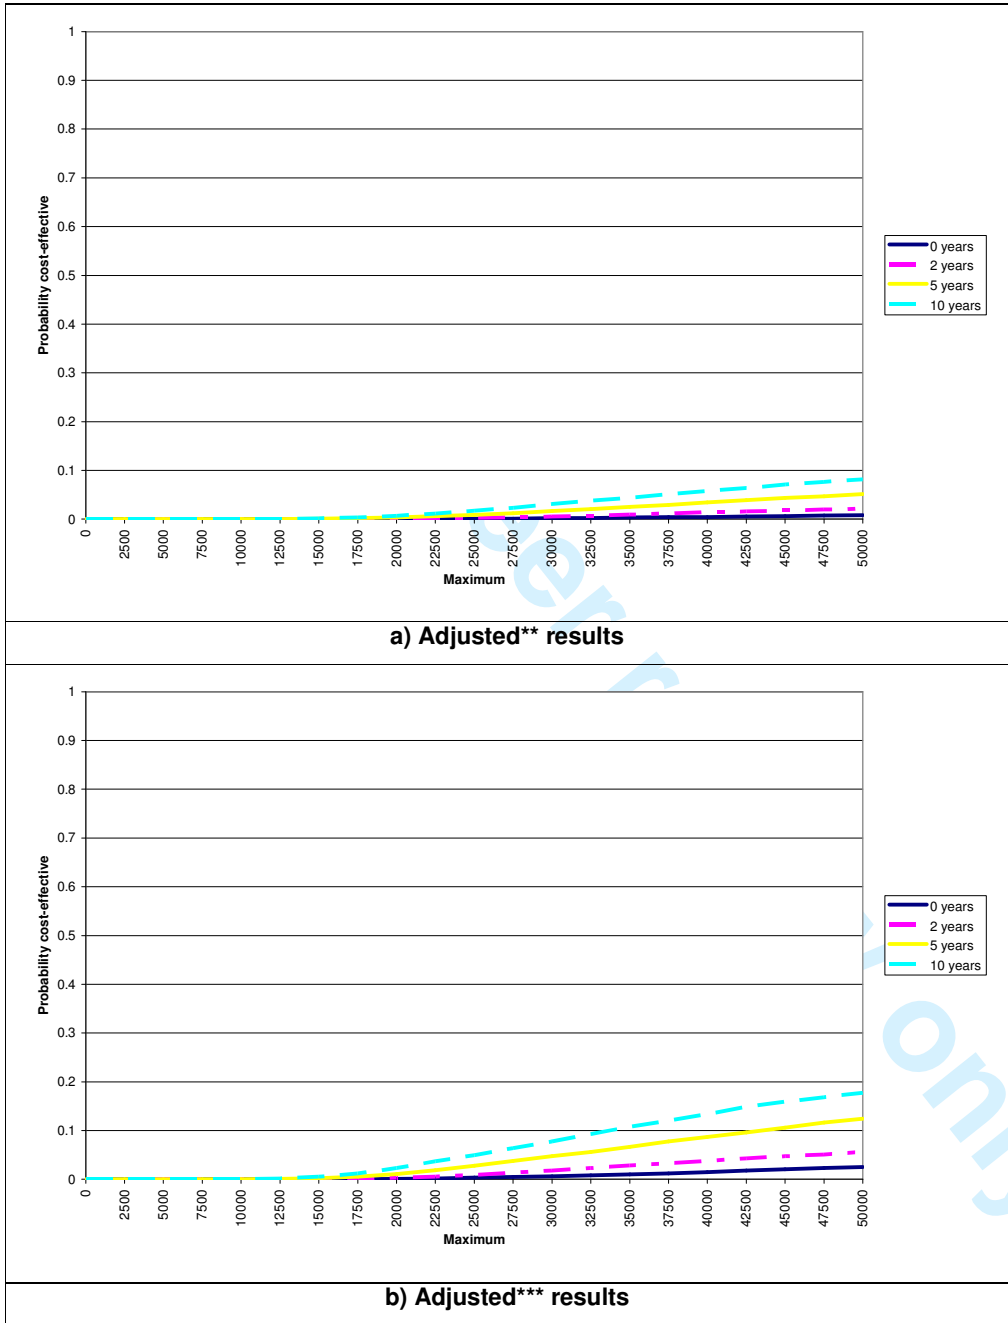

\*\* Adjusted for differences between groups by age and gender

\*\*\* Adjusted for differences between groups by age, gender and country

**Additional References for Appendix**

- 1  
2  
3  
4  
5  
6  
7  
8 21. Palmer S, Sculpher M, Philips Z, et al. A cost-effectiveness model comparing  
9  
10 alternative management strategies for the use of glycoprotein IIb/IIIa antagonists in  
11  
12 non-ST-elevation acute coronary syndrome. Report to the National Institute for  
13  
14 Health and Clinical Excellence. <http://www.nice.org.uk/Docref.asp?d=32030>. London:  
15  
16 NICE; 2002.
- 17  
18 22. Clarke P, Gray A, Legood R, Briggs A, Holman R. The impact of diabetes-related  
19  
20 complications on healthcare costs: results from the United Kingdom Prospective  
21  
22 Diabetes Study (UKPDS Study No. 65). *Diabet Med* 2003;20:442–50.
- 23  
24  
25 23. Youman P, Wilson K, Harraf F, Kalra L. The economic burden of stroke in the United  
26  
27 Kingdom. *Pharmacoeconomics* 2003;21(Suppl 1):43–50.
- 28  
29  
30 24. Meslop K, Boothroyd DB, Hlatky MA. Quality of life and time trade-off utility measures  
31  
32 in patients with coronary artery disease. *Am Heart J* 2003;145:36–41.
- 33  
34  
35 25. Goodacre S, Nicholl J, Dixon S, et al. Randomised controlled trial and economic  
36  
37 evaluation of a chest pain observation unit compared with routine care. *BMJ*  
38  
39 2004;328:254.
- 40  
41  
42 26. Tengs TO, Lin TH. A meta-analysis of quality of life estimates for stroke.  
43  
44  
45 *Pharmacoeconomics* 2003;21:191–200.
- 46  
47  
48  
49  
50  
51  
52  
53  
54  
55  
56  
57  
58  
59  
60

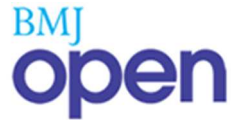

**Cost-effectiveness of a European preventive cardiology programme in primary care: A Markov Modelling Approach**

|                                 |                                                                                                                                                                                                                                                                                                                                                                                                                                                                    |
|---------------------------------|--------------------------------------------------------------------------------------------------------------------------------------------------------------------------------------------------------------------------------------------------------------------------------------------------------------------------------------------------------------------------------------------------------------------------------------------------------------------|
| Journal:                        | <i>BMJ Open</i>                                                                                                                                                                                                                                                                                                                                                                                                                                                    |
| Manuscript ID:                  | bmjopen-2012-001029.R2                                                                                                                                                                                                                                                                                                                                                                                                                                             |
| Article Type:                   | Research                                                                                                                                                                                                                                                                                                                                                                                                                                                           |
| Date Submitted by the Author:   | 15-Aug-2012                                                                                                                                                                                                                                                                                                                                                                                                                                                        |
| Complete List of Authors:       | Mistry, Hema; University of Birmingham, Health Economics Unit<br>Morris, Stephen; University College London, Department of Applied Health Research<br>Dyer, Matthew; National Institute for Health and Clinical Excellence, Kotseva, Kornelia; Imperial College London, Department of Cardiovascular Medicine<br>Wood, David; Imperial College London, Department of Cardiovascular Medicine<br>Buxton, Martin; Brunel University, Health Economics Research Group |
| <b>Primary Subject Heading</b>: | Health economics                                                                                                                                                                                                                                                                                                                                                                                                                                                   |
| Secondary Subject Heading:      | Cardiovascular medicine                                                                                                                                                                                                                                                                                                                                                                                                                                            |
| Keywords:                       | HEALTH ECONOMICS, CARDIOLOGY, PRIMARY CARE                                                                                                                                                                                                                                                                                                                                                                                                                         |
|                                 |                                                                                                                                                                                                                                                                                                                                                                                                                                                                    |

SCHOLARONE™  
Manuscripts

1  
2  
3  
4  
5  
6  
7  
8  
9  
10  
11  
12  
13  
14  
15  
16  
17  
18  
19  
20  
21  
22  
23  
24  
25  
26  
27  
28  
29  
30  
31  
32  
33  
34  
35  
36  
37  
38  
39  
40  
41  
42  
43  
44  
45  
46  
47  
48  
49  
50  
51  
52  
53  
54  
55  
56  
57  
58  
59  
60

# Cost-effectiveness of a European preventive cardiology programme in primary care: a Markov modelling approach

Hema Mistry<sup>\*ab</sup>

Stephen Morris<sup>c</sup>

Matthew Dyer<sup>d</sup>

Kornelia Kotseva<sup>e</sup>

David Wood<sup>e</sup>

Martin Buxton<sup>b</sup>

and on behalf of the EUROACTION study group

<sup>a</sup>Health Economics Unit, University of Birmingham, Birmingham, B15 2TT, UK

<sup>b</sup>Health Economics Research Group, Brunel University, Uxbridge, UB8 3PH, UK

<sup>c</sup>Department of Applied Health Research, University College London, London, WC1E  
6BT, UK

<sup>d</sup>National Institute for Health and Clinical Excellence, Midcity Place, 71 High Holborn,  
London, WC1V 6NA, UK

<sup>e</sup>Department of Cardiovascular Medicine, International Centre for Circulatory Health,  
National Heart and Lung Institute, Imperial College London, London, W2 1LA, UK

\*Corresponding author:

Dr Hema Mistry

Research Fellow in Health Economics

Health Economics Unit

University of Birmingham

Edgbaston

Birmingham, UK, B15 2TT

1  
2  
3  
4  
5  
6  
7  
8  
9  
10  
11  
12  
13  
14  
15  
16  
17  
18  
19  
20  
21  
22  
23  
24  
25  
26  
27  
28  
29  
30  
31  
32  
33  
34  
35  
36  
37  
38  
39  
40  
41  
42  
43  
44  
45  
46  
47  
48  
49  
50  
51  
52  
53  
54  
55  
56  
57  
58  
59  
60

Tel. +44 (0)121 414 8970

Email: [H.Mistry@bham.ac.uk](mailto:H.Mistry@bham.ac.uk)

For peer review only

**Abstract (word count 306)**

**Objective:** To investigate the longer-term cost-effectiveness of a nurse-coordinated preventive cardiology programme for primary prevention of cardiovascular disease compared to routine practice from a health service perspective.

**Design:** A matched, paired cluster-randomised controlled trial.

**Setting:** Six pairs of general practices in six countries.

**Participants:** 1,019 patients were randomised to the EUROACTION intervention programme and 1,005 patients to usual care and who completed the one-year follow-up

**Outcome measures:** Evidence on health outcomes and costs were based on patient level data from the study, which had a one-year follow-up period. Future risk of cardiovascular (CVD) events was modelled, using published risk models based on patient characteristics. An individual level Markov model for each patient was used to extrapolate beyond the end of the trial, which was populated with data from published sources. We used an 11-year time horizon and investigated the impact on cost-effectiveness of varying the duration of the effect of the intervention beyond the end of the trial. Results are expressed as incremental cost per quality-adjusted life year gained.

**Results:** Unadjusted results found the intervention to be more costly and also more effective than usual care. However, after adjusting for differences in age, gender, country and baseline risk factors, the intervention was dominated by usual care, but this analysis was not able to take into account of lifestyle changes in terms of diet and physical activity.

1  
2  
3 **Conclusions:** Although the EUROACTION study achieved healthier lifestyle changes and  
4 improvements in management of blood pressure and lipids for patients at high risk of CVD,  
5 compared to usual care, it was not possible to show, using available risk equations which do  
6 not incorporate diet and physical activity, that the intervention reduced longer-term  
7 cardiovascular risk cost-effectively. Whether or not an intervention such as that offered by  
8 EUROACTION is cost-effective requires a longer term trial with major cardiovascular events  
9 as the outcome.  
10  
11  
12  
13  
14  
15  
16  
17  
18  
19  
20  
21  
22  
23  
24  
25  
26  
27  
28  
29  
30  
31  
32  
33  
34  
35  
36  
37  
38  
39  
40  
41  
42  
43  
44  
45  
46  
47  
48  
49  
50  
51  
52  
53  
54  
55  
56  
57  
58  
59  
60



## Article summary

### Article focus

- To investigate the longer-term cost-effectiveness of a nurse-coordinated preventive cardiology programme for primary prevention of cardiovascular disease compared to routine practice.

### Key messages

- The EUROACTION study achieved healthier lifestyle changes and improvements in management of blood pressure and lipids for patients at high risk of CVD, compared to usual care.
- The unadjusted results of the cost-effectiveness analysis found the intervention to be more effective than usual care but also more costly. However, the adjusted results showed that the intervention was dominated by usual care.
- The published cardiovascular risk equations do not take account of lifestyle changes in terms of diet and physical activity and therefore may be inadequate for the evaluation of whether or not a lifestyle intervention to prevent cardiovascular disease is cost-effective.

### Strengths and limitations of the study

- This is the first study assessing the cost-effectiveness of the EUROACTION programme.
- The available cardiovascular risk modelling is based on a limited number of risk factors, which do not include measures of diet or physical activity, and a healthier lifestyle was the most important outcome of the EUROACTION trial.

**Trial Registration number:** ISRCTN 71715857

**Keywords:** Multi-centre studies; cardiovascular prevention programme; cost-effectiveness; Markov model; QALYs.

**Text word Count:** 3,415

## Introduction

Evidence has shown that individuals with increased risk of cardiovascular disease (CVD) can reduce their risk of cardiovascular morbidity and mortality by stopping smoking, changing their diet, engaging in physical activity, achieving a healthy body weight, and controlling their blood pressure, cholesterol and diabetes.[1] However, not all patients at high risk of developing CVD manage to achieve these recommended lifestyle and risk factor goals and there remains considerable potential to reduce CVD risk in these patients.[2] The EUROACTION study was designed to address the need for preventive cardiology care in everyday clinical practice.[3]

The EUROACTION study was a matched, paired cluster-randomised controlled trial, across eight countries and 24 hospitals and general practices. The project evaluated the impact of a nurse-coordinated, multidisciplinary preventive cardiology programme for coronary patients in hospital and high risk individuals in general practice. It aimed to help all these high risk patients and their families to achieve recommended lifestyle and risk factor targets for CVD prevention in everyday clinical practice over one year. The principal results concluded that the EUROACTION programme achieved healthier lifestyle changes and improvements in risk factor management for patients with coronary heart disease (CHD) and those at high risk of CVD, together with their partners, compared to usual care.[4]

While there is evidence that the EUROACTION programme is effective in terms of modifying lifestyle and some CVD risk factors, there is no evidence as to its cost-effectiveness.

Therefore, this paper aims to model the long-term cost-effectiveness of the EUROACTION programme in comparison with usual care within the primary care setting.

## Methods

### *Patients*

1  
2 The EUROACTION primary care study took place in Denmark, Italy, Netherlands, Poland,  
3 Spain and UK, where a matched pair of general practices was identified, and then  
4 randomised to either the EUROACTION programme or to usual care (UC). GPs  
5 prospectively identified the study population. The comparison was restricted to patients and  
6 did not include partners. Eligibility criteria for patients has previously been published.[4]  
7  
8  
9

10  
11  
12 All intervention patients were assessed at baseline and one-year. These assessments  
13 focussed on smoking habits, diet and physical activity, measurement of body mass index,  
14 blood pressure, cholesterol and glucose levels, and cardiac medications were also recorded.  
15  
16 The programme was delivered by specialist nurses, working with GPs, and supported by  
17 software programmes , educational materials and group workshops to achieve individual  
18 goals. Each person was given a personal record card to record lifestyle and risk factor  
19 goals, medications and appointments. To avoid the possibility that undergoing baseline  
20 assessments might affect outcomes, only a random sub-sample (~25%) of UC patients were  
21 seen at baseline and then all UC patients were invited for assessment at one-year. In the  
22 UC arm, patients did not receive any form of special care.  
23  
24  
25  
26  
27  
28  
29  
30  
31  
32  
33  
34  
35  
36

### 37 ***Model structure***

38  
39 We adopted a health service perspective to measure costs and outcomes. Each cycle in the  
40 model is of one year's duration. All patients were CVD-free on entering the model. In each  
41 subsequent cycle patients may remain CVD-event free, they may have a fatal or non-fatal  
42 CVD event, or they may die from non-CVD causes. Once the patient has had an initial CVD  
43 event, then in subsequent cycles they move to the post CVD-event states and they may  
44 move between different CVD states and/or die from CVD or non-CVD causes.  
45  
46  
47  
48  
49  
50  
51  
52

53 The CVD event states are: non-fatal myocardial infarction (MI), stable angina, unstable  
54 angina, CHD death, transient ischaemic attack (TIA), stroke, CVD death and non-CVD  
55 death.  
56  
57  
58  
59  
60

### ***Measuring initial CVD risk***

To estimate the risk of an initial CVD event in a subsequent year we used the D'Agostino et al [5] CVD risk function, derived from the Framingham Heart Study. This calculates individual sex-specific risks for future cardiovascular events (in patients initially free of CVD). These CVD risk equations incorporate as risk factors the natural logarithms of age, total and HDL cholesterol, systolic blood pressure (SBP) if treated with or without anti-hypertensive medications, smoking and diabetes. We used the published calibration factors to focus on the CHD and stroke event states.

Ten-year risks were estimated from the equations and adjusted to one-year values.[6] One-year CVD risk beyond the end of the trial was calculated based on both a) baseline patient characteristics (adjusted for age) for intervention patients only; and b) one-year follow-up characteristics for both groups, in order to evaluate any changes to CVD risk factors as a result of the EUROACTION programme.

### ***Validating the appropriateness of the risk functions of the model***

We tested the validity of applying the D'Agostino et al [5] risk equations to the study population, by comparing the observed number of CHD cases with the number predicted at one-year. Because stroke and TIA incidence data was not collected in the study we converted the CVD risk equations to CHD risks using the recommended calibration factors.[5] We present the results of the comparison for both groups.

### ***Transition probabilities***

We disaggregated the overall risk of a CVD event into rates for specific events by age and gender, using UK relative incidence rates based on published literature [7-9] and expert opinion, as previously used in Ward et al [10]. These event rates were applied to individual annual CVD risks to calculate individual transition probabilities for moving from the CVD-free

1  
2 state to the initial CVD-event states. Also, individual patients could die from non-vascular  
3 causes, depending on their age and gender. The non-CVD death transition probabilities  
4 were taken from Briggs et al.[11] Transition probabilities for moving from primary event  
5 health states to subsequent non-fatal health states are taken from Ward et al.[10]  
6  
7  
8  
9

### 10 11 12 **Measuring cost**

13  
14 Data on resources used during the trial and staff contacts were recorded in case record  
15 forms and then converted into electronic format. To determine the total one-year costs for  
16 each group, we obtained unit costs for all relevant items of resources used in the trial:  
17  
18  
19

20  
21  
22 *1. Costs relating to EUROACTION programme and other contacts in primary care* were  
23 obtained from the programme facilitators and included the EUROACTION nurses costs,  
24 training costs, production of patient educational materials and any other costs  
25 associated with implementing the programme. The average time spent by staff for all  
26 patient contacts at baseline and one-year was provided by each centre. Hourly wage  
27 rates of the staff salaries and training were calculated and then applied to these various  
28 patient contacts. We costed the EUROACTION family information packs, a pocket-  
29 sized personal record card, questionnaires and group sessions that each patient in the  
30 intervention group received as part of their prevention programme.  
31  
32  
33  
34  
35  
36  
37  
38  
39  
40  
41  
42

43 Costs were applied to other contacts with health care professionals, such as GPs,  
44 outside of the intervention programme for both arms and these costs were based on  
45 national estimates of the staff salaries involved and estimates of the average time spent  
46 with the patient provided by the trial co-ordinators.  
47  
48  
49  
50

51  
52  
53 *2. Cardiac-related drug costs.* Data was collected on patient-specific cardiac-related  
54 medications including the drug name and dose at baseline and one-year. This gave  
55 point of time information, but no start or end dates. So for each patient it was assumed  
56  
57  
58  
59  
60

1  
2 that they would remain on the same medication at a constant dose for the entire  
3  
4 duration e.g. from baseline to one-year. National cost estimates for the drugs were  
5  
6 provided by trial co-ordinators from each country and were applied accordingly to the  
7  
8 relevant dose and length of time on a patient-specific basis.  
9

10  
11  
12 *3. Cardiac-related procedures and tests.* During the trial, patients within both groups  
13  
14 may have required inpatient or outpatient admissions for cardiac-related procedures, or  
15  
16 undertaken any cardiac-related tests. The procedures were costed according to HRG  
17  
18 episodes for each country and the other tests or bed days as simple unit costs.  
19  
20 National unit cost estimates for cardiac-related procedures and tests for each country  
21  
22 were obtained from a database held by United BioSource Corporation (Erwin De Cock,  
23  
24 personal communication, May 2007) for all countries, except Denmark and Poland. For  
25  
26 these two countries, national unit cost estimates were provided from contacts within the  
27  
28 Centre for Applied Health Services Research and Technology in Denmark (Jan  
29  
30 Sørensen, personal communication, January 2007) and from the Ministry of Health in  
31  
32 Poland (Andrzej Pająk, personal communication, June 2007).  
33  
34  
35  
36

37 As the study was based in six countries, a costing algorithm was developed to calculate a  
38  
39 total cost per patient for each country. The costs of the programme were valued in local  
40  
41 currencies and then converted to 2006/2007 £ (GBP) using purchasing power parities.[12]  
42  
43 Table 1 presents the total one-year costs by group and country. Figure 1a shows that the 1-  
44  
45 year observed costs (split by type of cost) for the intervention group was significantly more  
46  
47 than the usual care group for all countries. This higher cost was explained by the  
48  
49 EUROACTION intervention programme costs and contacts with EUROACTION staff, whilst  
50  
51 neither arms experienced significantly high cost cardiac interventions or cardiac medications.  
52  
53  
54

55 Subsequent costs relating to health states occupied within the model were based on UK  
56  
57 estimates (see Appendix). It was assumed that patients in a CVD-free state would continue  
58  
59  
60

1  
2 to receive the cardiac-related medications and primary care contacts (outside of the  
3 intervention programme) that they received during the trial. The mean cost of these  
4 medications and contacts for all patients across both arms was applied to each individual  
5 patient within the model who remained in the event-free health state for subsequent years.  
6  
7  
8  
9

### 10 11 12 ***Health state utilities***

13 To estimate quality-adjusted life years (QALYs) the model requires utility values for each  
14 state adjusted by age. For patients who were event-free, the utility values were based on  
15 UK general population norms [13]; utilities for events/states were taken from Ward et al [10]  
16 which were all were based on UK studies and were obtained using the EQ-5D (see  
17 Appendix).  
18  
19  
20  
21  
22  
23  
24  
25  
26

### 27 ***Measuring the impact of the intervention***

28 The study provided results only for a one-year follow-up. We estimated results for a range of  
29 possible durations of effect, assuming that the CVD risk reduction experienced by the  
30 intervention patients persisted for 0 through to 10 additional years (11-year time horizon),  
31 after which they reverted to their individual CVD risk factor levels at the start of the study  
32 (adjusted for age). For UC patients, it was assumed that patients would remain at their one-  
33 year CVD risk (adjusted annually by age) throughout the model.  
34  
35  
36  
37  
38  
39  
40  
41  
42  
43

### 44 ***Measuring cost-effectiveness***

45 Using the Markov model we calculated for each patient their expected quality-adjusted  
46 survival (based on their likelihood of surviving each cycle and their expected health state  
47 utility value) and their expected costs. Cost-effectiveness was measured in terms of the  
48 incremental cost per QALY gained (ICER). Future costs and benefits were discounted at  
49 3.5%. [14]  
50  
51  
52  
53  
54  
55  
56  
57

### 58 ***Statistical analyses***

1  
2 All statistical analyses were performed in Stata version 10 [15] or Microsoft Excel and a p-  
3 value  $\leq 0.05$  was considered to be statistically significant. We present unadjusted and  
4 adjusted cost-effectiveness results. The adjusted results controlled for group allocation, age,  
5 gender, age\*gender interactions, country, and baseline risk factors using OLS regressions.  
6 As only a random sub-sample of UC patients were seen at baseline, regression analyses  
7 were used to predict baseline values for those patients who had missing values. For total  
8 and HDL cholesterol and SBP, OLS regression was used to predict values in those patients  
9 with missing values, as a function of age, gender and country. For the three binary variables  
10 (medications, smoking and diabetes), logistic regression models were used to predict the  
11 probability of each binary outcome. Predicted values  $\geq 0.5$  were categorised to a value of 1  
12 and values  $< 0.5$  were categorised as 0. In the adjusted models we also included an  
13 indicator for whether or not each control variable was missing.  
14  
15  
16  
17  
18  
19  
20  
21  
22  
23  
24  
25  
26  
27  
28

29 We represented uncertainty due to sampling variation in both the unadjusted and adjusted  
30 cost-effectiveness ratios using non-parametric bootstrapping. In the unadjusted analyses we  
31 sampled individuals in our model with replacement and used their costs and outcomes over  
32 the 11-year period to compute replications of the incremental cost per QALY gained. We  
33 repeated this approach in the adjusted analyses, also adding the regressions to control for  
34 confounding factors. In each case, we generated 10,000 bootstrap replications of the cost-  
35 effectiveness ratios and used these to construct 95% confidence intervals around the point  
36 estimate of cost-effectiveness.  
37  
38  
39  
40  
41  
42  
43  
44  
45  
46

### 47 ***Sensitivity analysis***

48 The main analysis modelling was limited to ten years, in the absence of robust longer-term  
49 risk models. As a sensitivity analysis, we used a simplified longer-term model to check  
50 whether the conclusions of the main analysis would have been likely to be different if a  
51 longer-term perspective had been adopted e.g. 25 years. This model essentially assumed  
52  
53  
54  
55  
56  
57  
58  
59  
60



1  
2 no further effect of the intervention but modelled out fully the possible QALY gains from the  
3 medium-term (11 year) differences in mortality and event rates.  
4  
5  
6  
7

## 8 **Results**

9  
10 The baseline characteristics for the intervention group as a whole and the usual care  
11 subsample who were seen at baseline are shown in Table 2. There were significant  
12 differences in the distribution between countries. Mean total and HDL cholesterol levels  
13 were significantly higher for the intervention compared with the UC group. Whilst no  
14 statistically significant differences were observed for other baseline characteristics, but the  
15 10-year CVD risk at baseline [5] was numerically higher for the UC group than the  
16 intervention arm.  
17  
18  
19  
20  
21  
22  
23  
24

25  
26 We modelled 1,019 patients in the intervention arm and 1,005 patients in the UC arm who  
27 were assessed at one-year.[4] The intervention group had fewer males than the UC group:  
28 49.8% vs. 57.4% male ( $p=0.001$ ), and was significantly younger (mean age at one-year:  
29 intervention: 61.5 years vs. usual care: 62.3 years,  $p=0.011$ ).  
30  
31  
32  
33  
34  
35  
36

37 When testing the validity of the Framingham risk equations to the study population we found  
38 that 8 intervention patients and 1 UC sub-sample patient experienced a CHD-event. The  
39 risk equations produced a close match, predicting 8.5 patients with a first CHD-event in the  
40 intervention group and 2.0 in the UC sub-sample.  
41  
42  
43  
44  
45  
46

47 Figure 1b further emphasises that the observed additional costs of the EUROACTION  
48 intervention programme and staff costs were not offset by the estimated reduced costs of  
49 cardiac interventions in the subsequent years. In terms of the unadjusted results, the  
50 incremental costs of the intervention are £362-£419 depending on the duration of the effect  
51 of the intervention and the incremental QALYs are 0.076-0.085 (see Table 3). As expected,  
52 the incremental costs fall and the incremental QALYs rise as the duration of the effect of the  
53  
54  
55  
56  
57  
58  
59  
60

1  
2 intervention beyond the end of the trial increases. The incremental cost per QALY gained  
3  
4 range from £5,539 (95% CI £2,625-£29,627) to £4,266 (95% CI £2,059-£15,945). The  
5  
6 unadjusted CEACs under each scenario are in Figure 2a and highlights the results in Table  
7  
8 3 that in all scenarios over 95% of the bootstrapped replications are less than £20,000.  
9

10  
11  
12 After controlling for differences in age, gender, country and baseline risk factors, the  
13  
14 intervention is associated with higher costs and lower QALYs than the UC arm in  
15  
16 every scenario (an example of the various regression models is shown in the  
17  
18 Appendix). As a result, the intervention is dominated by UC. Although there is  
19  
20 considerable uncertainty around those point estimates with the 95% confidence  
21  
22 intervals ranging from acceptably cost-effective to highly dominated, but the  
23  
24 probability of being cost-effective are very low, as shown in the adjusted CEACs in  
25  
26 Figure 2b (additional adjusted CEACs, controlling for age, gender and country only  
27  
28 are in the Appendix). At a cost-effectiveness threshold of £20,000 the  
29  
30 EUROACTION intervention will be cost-effective in under 6% of cases.  
31  
32

33  
34 Due to baseline differences, we conducted age-sex matched subgroup analyses and the  
35  
36 adjusted results confirmed that the intervention remained dominated, even when an  
37  
38 optimistic timeframe was considered (an example of age-sex matched subgroup analysis is  
39  
40 shown in the Appendix).  
41  
42

43  
44  
45 The sensitivity analysis produced predictable results that in no way changed the conclusions  
46  
47 of the analysis. Using the unadjusted data, the cost-effectiveness of the intervention was  
48  
49 further enhanced, and using the adjusted data the domination of UC over the intervention  
50  
51 remained.  
52

## 53 54 55 **Discussion** 56 57 58 59 60

1  
2 Although this large European trial demonstrated that a nurse-coordinated preventive  
3 cardiology programme in primary care helped more high risk patients to achieve the lifestyle  
4 and risk factor targets in comparison with UC this does not appear to be cost-effective.  
5  
6 However, these cost-effectiveness analyses require careful qualification because they are  
7  
8 subject to a number of uncertainties which are a consequence of the study design and  
9  
10 important limitations in the statistical model used.  
11  
12

13  
14  
15  
16 The differences in the adjusted and unadjusted results emphasise that the study design,  
17 based on matching pairs of general practices in each country, did not eliminate baseline  
18 differences between the two groups in cardiovascular risk factors. These differences meant  
19 that the two groups had different levels of baseline risk, higher in intervention than usual  
20 care, but the economic results have adjusted for these baseline differences. Though these  
21 differences were small in absolute terms they have a substantial effect on the estimates of  
22 absolute risk of future cardiovascular events, and therefore on the difference in effectiveness  
23 between intervention and UC. Additionally, the study recorded its primary endpoints at  
24 baseline and one-year, and to avoid 'contamination' by recording risk factor levels in UC,  
25 baseline measurements were only made in a sub-sample of UC patients. Thus, we do not  
26 have before and after measurements for 75% of the UC patients.  
27  
28  
29  
30  
31  
32  
33  
34  
35  
36  
37  
38  
39

40  
41 Our cost-effectiveness analysis did not include partners. If partners were included it might  
42 improve the cost-effectiveness, but we have no good measure of the effect on partners to  
43 know how substantial the impact on the incremental cost-effectiveness ratio might be.  
44  
45  
46  
47  
48

49 Our estimates of the risk of future CVD-events are based on published risk equations.[5]  
50 These are derived from a large, well characterised cohort (8491 participants) and predict  
51 CVD risk as opposed to CHD risk alone. The C statistic for the model ranges from 0.76  
52 (men) to 0.79 (women) suggesting that additional risk factors could potentially improve the  
53 model's discriminatory power. Other risk models have included risk factors such as family  
54  
55  
56  
57  
58  
59  
60

1  
2 history of CVD, social deprivation and biomarkers e.g. hs-CRP [16-17] although these  
3  
4 models also have their own limitations.  
5  
6  
7

8  
9 However, to date lifestyle factors such as dietary habits and physical inactivity although  
10 important in the aetiology of CHD [18] and independent of the other major risk factors, have  
11 not been included in such risk scores, because they are difficult to accurately quantify. The  
12 omission of these important lifestyle factors in the Framingham risk equations may be  
13 particularly relevant in our study as the cornerstone of the EUROACTION programme was  
14 lifestyle change which was clearly evident in the study's most striking achievements in this  
15 area including significantly higher fruit and vegetable consumption ( $p = 0.005$ ); physical  
16 activity levels ( $p = 0.01$ ); and weight loss ( $p = 0.005$ ).  
17  
18  
19  
20  
21  
22  
23  
24  
25  
26

27 It is thus possible that our estimates of relative differences in absolute risk between the  
28 groups may understate the full effects of the intervention on long-term CVD risk. However,  
29 we showed that the risk equations are able to predict CHD events in the study population in  
30 the one-year follow-up period, but the accuracy of the risk equations over the ten-year period  
31 of our study remains untested.  
32  
33  
34  
35  
36  
37  
38

39 Our modelling also requires an assumption about how long any differential effect of the  
40 intervention persists. Nothing is known about the longer-term effects of EUROACTION, and  
41 there are few studies that have looked at longer-term changes. The longest follow-up to a  
42 relevant life-style change appears to be the OXCHECK study which showed that the benefits  
43 of health checks were sustained over three years.[19-20] However, whatever the duration  
44 of effect beyond the trial, and even when a 25-year model was used, the policy conclusions  
45 remain the same.  
46  
47  
48  
49  
50  
51  
52  
53  
54  
55

56 Finally, our model uses a regression analysis approach so that a UK specific estimate can  
57 be drawn from the complete multinational EUROACTION dataset on net resource use, costs  
58  
59  
60

1  
2 and net effects of the intervention. The epidemiological, utilities and cost data for the longer-  
3 term modelling of risk and events is based on UK data alone. Thus, the results are  
4 applicable to the UK and not specifically to the other EUROACTION countries. Whilst formal  
5 analysis would be needed to confirm this, the coefficients on the country parameters in the  
6 regression analyses of both costs and outcomes suggest that the cost-effectiveness would  
7 be broadly similar in the other countries.  
8  
9  
10  
11  
12  
13

### 14 15 16 17 **Conclusion**

18 Although the EUROACTION study demonstrated in high risk patients in primary care  
19 significant improvements in lifestyle and CVD risk factors, it is not possible to show, using  
20 the best available risk equations, that the intervention was cost-effective. The available risk  
21 modelling is based on a limited number of risk factors, which do not include diet or physical  
22 activity, and a healthier lifestyle was the most important outcome of this trial. Therefore,  
23 whether or not an intervention such as that offered by EUROACTION is cost-effective  
24 remains an open question that could be answered by a longer-term trial with major adverse  
25 cardiovascular events as the primary endpoint.  
26  
27  
28  
29  
30  
31  
32  
33  
34  
35  
36  
37  
38  
39  
40  
41  
42  
43  
44  
45  
46  
47  
48  
49  
50  
51  
52  
53  
54  
55  
56  
57  
58  
59  
60

## Acknowledgements

### *EUROACTION Steering Group*

A scientific steering group approved the protocol and the design for this matched pair cluster-randomised controlled trial, and is responsible for the scientific integrity of the study.

The steering group has the following membership: D Wood (London, UK, Chairman), G De Backer (Ghent, Belgium), D De Bacquer (Ghent, Belgium), M Buxton (Uxbridge, UK), I Graham (Dublin, Ireland), A Howard (Nice, France), K Kotseva (London, UK), S Logstrup (Brussels, Belgium), H McGee (Dublin, Ireland), M Mioulet (Nice, France), K Smith (Dundee, UK), D Thompson (York, UK), T Thomsen (Glostrup, Denmark), T van der Weijden (Maastricht, the Netherlands).

### *National co-ordinators*

The national co-ordinators for each country are also members of the steering committee.

They are responsible for identifying and recruiting general practices, obtaining ethics committee approval, appointing and supervising staff in the centres and contributing scientifically to the publication of results. The EUROACTION National Co-ordinators and Primary care leaders are as follows:

Denmark: T Thomsen, K Brockelmann; Italy: P Fioretti, A Desideri, S Brusaferrò; Poland: A Pajak, K. Kawecka-Jaszcz, P Jankowski, T Grodzicki; Spain: J De Velasco, A Maiques; Netherlands: T van der Weijden; United Kingdom: D Wood, J Morrell.

### *Co-ordinating and Data Management Centre*

The Co-ordinating and Data Management Centre is the Department of Cardiovascular Medicine, National Heart and Lung Institute at Charing Cross Campus, Imperial College, London, UK (Head Professor David Wood). The following staff have specific responsibilities as described: K Kotseva, Senior Clinical Research Fellow; S Connolly, Research Fellow; C Jennings, Study Nurse Co-ordinator; A Mead, Chief Dietician; J Jones, Superintendent

1  
2  
3  
4  
5  
6  
7  
8  
9  
10  
11  
12  
13  
14  
15  
16  
17  
18  
19  
20  
21  
22  
23  
24  
25  
26  
27  
28  
29  
30  
31  
32  
33  
34  
35  
36  
37  
38  
39  
40  
41  
42  
43  
44  
45  
46  
47  
48  
49  
50  
51  
52  
53  
54  
55  
56  
57  
58  
59  
60

Physiotherapist; A Holden, Physical activity Co-ordinator; T Collier, Statistician; M Alston, D Charlesworth, P Homewood, K Pandya, M Somaia, IT specialists/Data managers; S Graves, Research Administrator; W Leacock, D Xenikaki, Administrative Assistants. The following experts advised the Co-ordinating Centre on dietary and physical activity assessment: Professor Gary Frost, Professor Barry Margetts, Dr Mike Nelson and Dr Charlie Foster.

#### *Central Laboratory*

Central Laboratory analysis of total cholesterol, HDL cholesterol, triglycerides, glucose and HbA1c are undertaken by A McLelland, R Birrell and G Beastall in the Department of Pathological Biochemistry, Royal Infirmary, Glasgow (Head of Department J Shepherd).

#### *Statistical Centres*

The statistical analyses for the primary endpoints were undertaken by D De Bacquer, Statistician, from the Department of Public Health (Head of Department G De Backer), Ghent University, Belgium, and supplementary analyses by T Collier, Statistician, Department of Medical Statistics, London School of Hygiene and Tropical Medicine, University of London, UK.

#### *Health Economics Centre*

Martin J Buxton, Professor of Health Economics and Director: Health Economics Research Group, Brunel University, UK; Hema Mistry and Matthew Dyer, Research Fellows in Health Economics, Brunel University.

#### *Primary Care Centres*

##### *Denmark*

Intervention Centre: Sundhedscenteret Skanderborg. Dr Lisbeth Rosborg, GP/ Practice Manager; Susanne Holck Mogensen, Nurse.

Usual Care Centre: Gasvej 5, 8700 Horsens. Dr Henrik Zanoni, GP; Lene Henriksen, Nurse.

*Italy*

Intervention Centre: Rive dai Stimatinis 12, 33013 Gemona del Friuli. Dr Beppino Colle, Primary Care Intervention Coordinator; Dr Massimiliano Rugolo, Principal Investigator/GP; Tilla Gurisatti, Nurse.

Usual Care Centre: Via S. Valentino 20, 33100 Udine. Dr Mario Casini, Italy Usual Care Coordinator. Dr Fabrizio Gangi, Italy Usual Care PI/GP. Daniela Gurisatti and Loredana Trevisani, Nurses.

*Netherlands*

Intervention Centre: Gezondheidscentrum Hoensbroek-Noord. Dr Martijn van Nunen and Dr Bem Bruls, GPs; Jasja Janssen, Nurse; Mrs Mathil Sanders, Practice Manager.

Usual Care Centre: Dr Mieke Winten-Huisman and Dr Marc Eyck, GPs; Rene van den Heuvel and Claudia Gessing, Nurses.

*Poland*

Intervention Centre: Centrum Medycyny Profilaktycznej w Krakowie. Dr Krystyna Pająk, Principal Investigator; Lidia Dwojak, Practice Manager; Joanna Śladek-Ratajewicz, GP; Barbara Waligóra and Irena Smarzyńska, Nurses.

Usual Care Centre: Podstawowa Opieka Zdrowotna - Szpital Uniwersytecki w Krakowie. Dr Maria Fornal, Principal Investigator; Dr Jolanta Walczewska, GP; Barbara Wojtanis and Helena Kamińska, Nurses.

*Spain*

Intervention Centre: Centro de Salud Salvador Pau, Valencia. Dr Jorge Navarro, Principal Investigator; Gemma Méndez Pérez, Nurse; Dr. Maria Jose Donat, Dr. Raquel Prieto, Dr. Rosario Gonzalez, Dr. Teresa Almela, Dr. Amaparo Garcia and Dr. Francisco Cortes, GPs.



1  
2 Usual Care Centre: Centro de Salud de Manises, Valencia. Dr Lorenzo Pascual, Principal  
3 Investigador; Rocio Marco, Nurse; Dr Juan Manuel García, Practice Manager; Dr Antonia  
4 Ibañez, Dr. Cecilia Ruiz, Dr. Santos Plaza, Dr. Amparo Moreno and Dr. Carmen Lloret, GPs.  
5  
6  
7  
8  
9

10 *UK*

11  
12 Intervention Centre: Seaside Medical Centre, Eastbourne. Dr Tim Gietzen, Principal  
13 Investigator; Sjouke Ashton, Nurse; George Bordoli, Associate Nurse; Daniel Brookbank and  
14 Angela Hughes, Practice Managers.  
15  
16  
17

18 Usual Care Centre: Green Street Clinic, Eastbourne. Dr Ian McNaughton, Principal  
19 Investigator; Shirley Colvin, Nurse; Heather King, Practice Manager.  
20  
21  
22  
23

24  
25 *Acknowledgement:* EUROACTION is an initiative of the European Society of Cardiology  
26 which highlights its commitment to improve the quality of life of the European population by  
27 reducing the impact of cardiovascular diseases. The study protocol conforms to the ethical  
28 guidelines of the 1995 Declaration of Helsinki with ethics committee approval in all countries  
29 and for every centre. Written informed consent was obtained from every subject.  
30  
31  
32  
33

34 *Competing interest statement:* All authors declare that the answer to the questions on your  
35 competing interest form [bmj.com/cgi/content/full/317/7154/291/DC1](http://bmj.com/cgi/content/full/317/7154/291/DC1) are all No and therefore  
36 have nothing to declare.  
37  
38  
39

40 *Funding:* Sponsored solely by AstraZeneca through the provision of an unconditional  
41 educational grant. AstraZeneca had no involvement in the study design; in the collection,  
42 analysis and interpretation of the data; in the writing of the report; and in the decision to  
43 submit the paper for publication.  
44  
45  
46

47 *Author contributions:* DW and MB are part of the steering committee and approved the  
48 protocol and the design for this matched paired cluster-randomised trial. DW was  
49 responsible for the overall direction of the project. HM and MD conducted the economic  
50 analysis under the supervision of SM and MB and with guidance from DW. KK was  
51 responsible for local data collection. HM drafted the manuscript with input from all authors;  
52 all authors have approved the final manuscript and were involved in the interpretation of the  
53 results.  
54  
55  
56  
57  
58  
59  
60

Table 1: Observed 1-year costs for EUROACTION study (in £ GBP)

| 2006/2007 prices    | Denmark        | Italy          | Netherlands    | Poland         | Spain          | UK             | Total          |
|---------------------|----------------|----------------|----------------|----------------|----------------|----------------|----------------|
| <b>Intervention</b> |                |                |                |                |                |                |                |
| N                   | 104            | 165            | 191            | 234            | 199            | 126            | 1,019          |
| Mean (SD)           | £589 (£379)    | £595 (£366)    | £756 (£466)    | £515 (£179)    | £588 (£269)    | £625 (£181)    | £608 (£329)    |
| Median              | £541           | £562           | £704           | £463           | £550           | £594           | £560           |
| IQR                 | £473 to £614   | £451 to £680   | £546 to £862   | £374 to £616   | £420 to £714   | £530 to £729   | £449 to £714   |
| Range               | £268 to £4,054 | £179 to £3,733 | £166 to £5,064 | £282 to £1,578 | £139 to £1,669 | £163 to £1,206 | £139 to £5,064 |
| <b>Usual Care</b>   |                |                |                |                |                |                |                |
| N                   | 154            | 194            | 123            | 160            | 193            | 181            | 1,005          |
| Mean (SD)           | £295 (£490)    | £201 (£365)    | £246 (£307)    | £159 (£167)    | £138 (£207)    | £307 (£563)    | £221 (£384)    |
| Median              | £193           | £146           | £125           | £105           | £68            | £196           | £142           |
| IQR                 | £152 to £275   | £104 to £198   | £84 to £250    | £84 to £159    | £56 to £122    | £140 to £303   | £90 to £225    |
| Range               | £98 to £3,364  | £70 to £4,455  | £65 to £2,806  | £60 to £1,255  | £40 to £2,173  | £73 to £6,500  | £40 to £6,500  |

Table 2: Baseline characteristics

|                                                              | Intervention<br>(n= 1,019) | Usual care<br>subsample<br>(n = 252) | Usual care all<br>(n = 1,005) | Statistical test <sup>#</sup><br>(Int. vs. UC subsample) | Statistical test <sup>#</sup><br>(Int. vs. UC all) |
|--------------------------------------------------------------|----------------------------|--------------------------------------|-------------------------------|----------------------------------------------------------|----------------------------------------------------|
| <i>Country</i>                                               |                            |                                      |                               |                                                          |                                                    |
| Denmark                                                      | 104 (10.2%)                | 40 (15.9%)                           | 154 (15.3%)                   | p = 0.012                                                | p < 0.001                                          |
| Italy                                                        | 165 (16.2%)                | 47 (18.7%)                           | 194 (19.3%)                   |                                                          |                                                    |
| Netherlands                                                  | 191 (18.7%)                | 37 (14.7%)                           | 123 (12.2%)                   |                                                          |                                                    |
| Poland                                                       | 234 (23.0%)                | 45 (17.9%)                           | 160 (15.9%)                   |                                                          |                                                    |
| Spain                                                        | 199 (19.5%)                | 41 (16.3%)                           | 193 (19.2%)                   |                                                          |                                                    |
| UK                                                           | 126 (12.4%)                | 42 (16.7%)                           | 181 (18.0%)                   |                                                          |                                                    |
| <i>Gender</i>                                                |                            |                                      |                               |                                                          |                                                    |
| Male                                                         | 507 (49.8%)                | 133 (52.8%)                          | 577 (57.4%)                   | p = 0.390                                                | p = 0.001                                          |
| Female                                                       | 512 (50.3%)                | 119 (47.2%)                          | 428 (42.6%)                   |                                                          |                                                    |
| <i>Risk factors required for the D'Agostino Equation [5]</i> |                            |                                      |                               |                                                          |                                                    |
| <i>n (%)</i>                                                 |                            |                                      |                               |                                                          |                                                    |
| Non-smoker                                                   |                            |                                      |                               | p = 0.646                                                | -                                                  |
| Has diabetes                                                 | 695 (68.2%)                | 155 (61.5%)                          | -                             |                                                          |                                                    |
| On anti-hypertensive drugs                                   | 313 (30.7%)                | 68 (27.0%)                           | -                             |                                                          |                                                    |

|                                 |               |               |            |           |           |
|---------------------------------|---------------|---------------|------------|-----------|-----------|
| Mean (SD)                       | 432 (42.4%)   | 97 (38.5%)    | -          | p = 0.260 | -         |
| Age                             |               |               |            |           |           |
| Systolic blood pressure (mm HG) | 60.5 (7.6)    | 60.4 (7.3)    | 61.3 (7.3) | p = 0.915 | p = 0.011 |
| Total cholesterol (mmol/L)      | 141.1 (18.6)  | 141.6 (18.9)  | -          | p = 0.693 | -         |
| HDL cholesterol (mmol/L)        | 5.70 (1.02)   | 5.45 (0.99)   | -          | p = 0.001 | -         |
|                                 | 1.40 (0.39)   | 1.35 (0.36)   | -          | p = 0.047 | -         |
| 10-year CVD risk at baseline    | 0.115 (0.087) | 0.120 (0.093) | -          | p = 0.426 | -         |

# Chi-squared tests conducted for categorical variables and t tests conducted for continuous variables

**Table 3: Results from cost-effectiveness model**

|                                   | Duration of effect of intervention beyond the end of the trial (model time horizon = 11* years in all cases) |                        |                        |                        |
|-----------------------------------|--------------------------------------------------------------------------------------------------------------|------------------------|------------------------|------------------------|
|                                   | 0 years                                                                                                      | 2 years                | 5 years                | 10 years               |
| <b>Unadjusted costs and QALYs</b> |                                                                                                              |                        |                        |                        |
| Usual care mean cost (SD)         | £2,727 (£29)                                                                                                 | £2,727 (£29)           | £2,727 (£29)           | £2,727 (£29)           |
| Intervention mean cost (SD)       | £3,146 (£33)                                                                                                 | £3,126 (£31)           | £3,105 (£31)           | £3,089 (£31)           |
| Usual care mean QALYs (SD)        | 6.755 (0.021)                                                                                                | 6.755 (0.021)          | 6.755 (0.021)          | 6.755 (0.021)          |
| Intervention mean QALYs (SD)      | 6.831 (0.021)                                                                                                | 6.835 (0.021)          | 6.838 (0.021)          | 6.840 (0.021)          |
| Incremental costs (95% CI)        | £419 (£332 to £505)                                                                                          | £399 (£315 to £483)    | £378 (£294 to £462)    | £362 (£278 to £447)    |
| Incremental QALYs (95% CI)        | 0.076 (0.017 to 0.135)                                                                                       | 0.079 (0.020 to 0.138) | 0.083 (0.024 to 0.142) | 0.085 (0.026 to 0.144) |

|                                  |                          |                          |                          |                          |
|----------------------------------|--------------------------|--------------------------|--------------------------|--------------------------|
| ICER                             | £5,539                   | £5,031                   | £4,561                   | £4,266                   |
| 95% CI                           | £2,625 to £29,627        | £2,412 to £22,520        | £2,202 to £18,155        | £2,059 to £15,945        |
| % of bootstrapped ICERs < £20k   | 95.7%                    | 97.0%                    | 97.9%                    | 98.4%                    |
| % of bootstrapped ICERs < £30k   | 97.6%                    | 98.4%                    | 99.0%                    | 99.2%                    |
| <b>Adjusted costs and QALYs‡</b> |                          |                          |                          |                          |
| Incremental costs (95% CI)       | £474 (£368 to £580)      | £463 (£358 to £568)      | £450 (£343 to £557)      | £441 (£331 to £550)      |
| Incremental QALYs (95% CI)       | -0.009 (-0.041 to 0.023) | -0.007 (-0.038 to 0.025) | -0.005 (-0.036 to 0.027) | -0.003 (-0.035 to 0.029) |
| ICER                             | Dominated†               | Dominated†               | Dominated†               | Dominated†               |
| 95% CI                           | £21,695 to dominated†    | £18,495 to dominated†    | £15,908 to dominated†    | £14,485 to dominated†    |
| % of bootstrapped ICERs <£20k    | 1.97%                    | 3.16%                    | 4.57%                    | 5.76%                    |
| % of bootstrapped ICERs <£30k    | 5.05%                    | 6.98%                    | 9.42%                    | 11.54%                   |

SD = standard deviation; QALYs = quality-adjusted life years; ICER = incremental cost-effectiveness ratio; CI = confidence interval

# 1 year study follow-up period plus a 10 year model

† The intervention is more costly and yield fewer QALYs than usual care

‡ Adjusting for the following baseline characteristics: age, gender, age\*gender, country, total and HDL cholesterol, SBP, anti-hypertensive medications, smoking and diabetes.

**Figure 1a: One-year observed costs for the Intervention and Usual Care groups split by type**

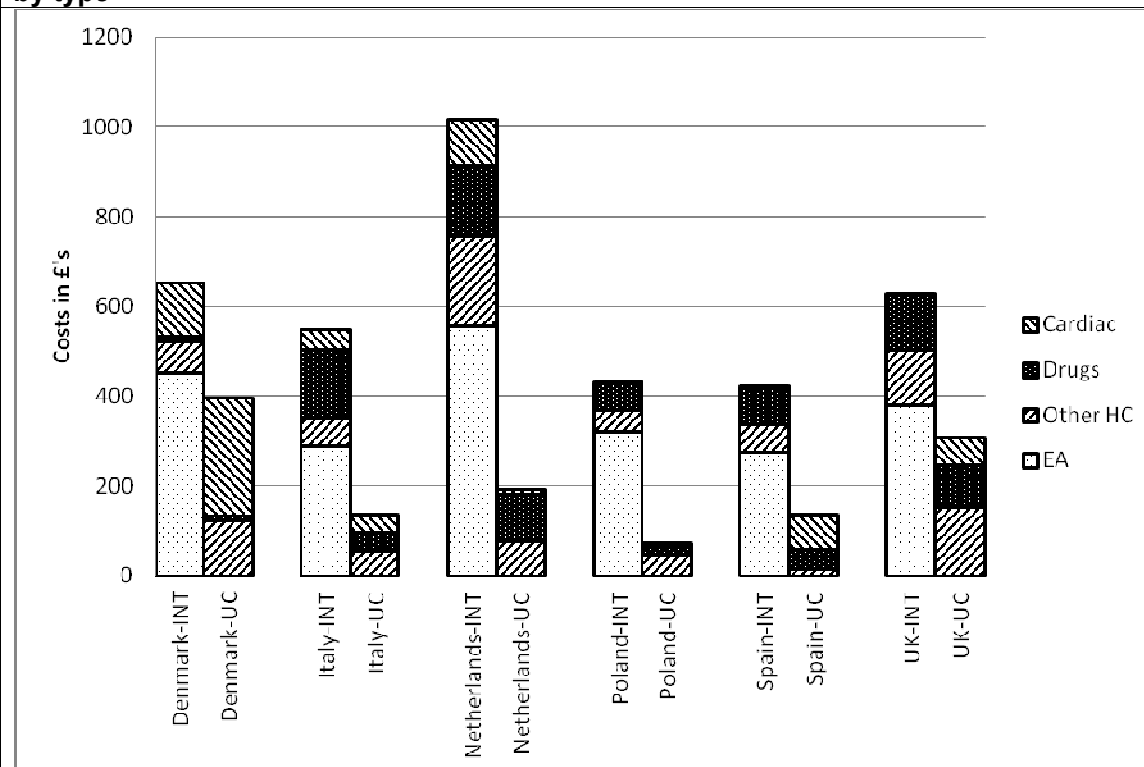

Key: EA = EuroAction costs; Other HC = other health care costs; Drugs = cardiac related medication costs; Cardiac = cardiac procedure costs

**Figure 1b: Mean costs for the Intervention and Usual Care groups for the main health states in the Markov model**

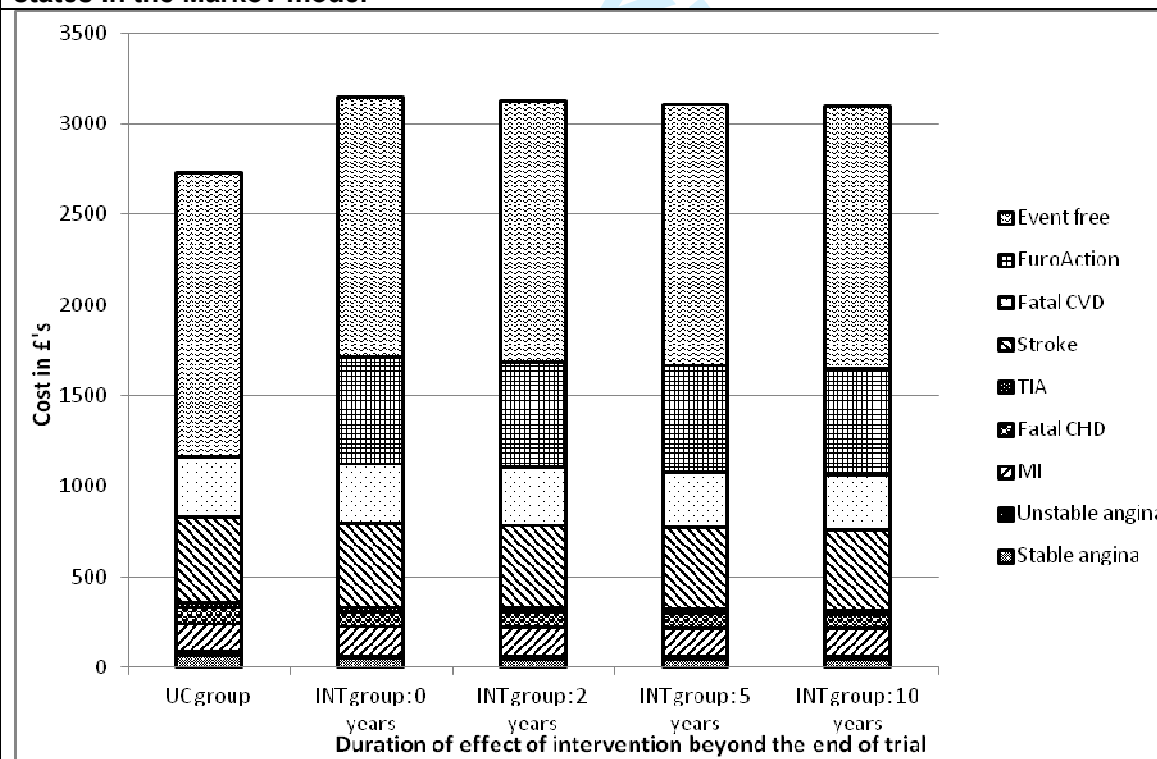

1  
2  
3  
4  
5  
6  
7  
8  
9  
10  
11  
12  
13  
14  
15  
16  
17  
18  
19  
20  
21  
22  
23  
24  
25  
26  
27  
28  
29  
30  
31  
32  
33  
34  
35  
36  
37  
38  
39  
40  
41  
42  
43  
44  
45  
46  
47  
48  
49  
50  
51  
52  
53  
54  
55  
56  
57  
58  
59  
60

Figure 2: Cost-effectiveness acceptability curves

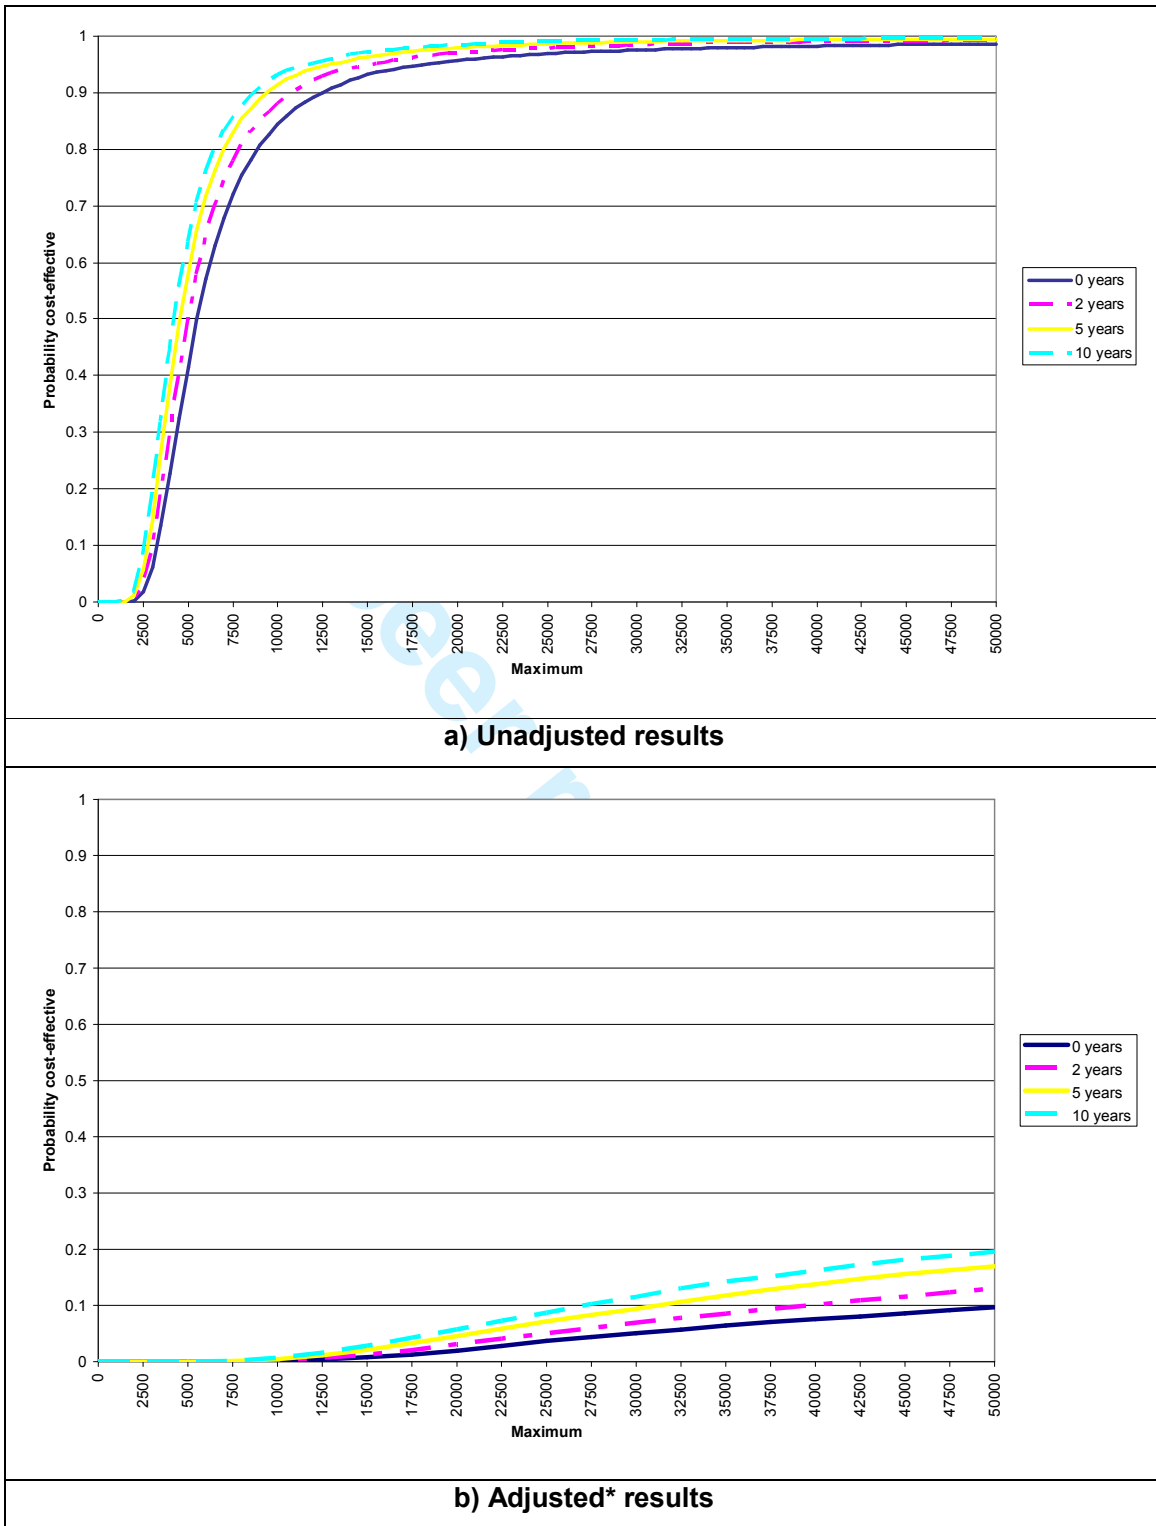

\* Adjusted for differences between groups by age, gender, country and baseline risk factors

## References

1. Graham I, Atar D, Borch-Johnsen K, et al. European guidelines on cardiovascular disease prevention in clinical practice: executive summary. Fourth Joint Task Force of the European Society of Cardiology and Other Societies on Cardiovascular Disease Prevention in Clinical Practice (Constituted by representatives of nine societies and by invited experts). *Eur Heart J* 2007;28:2375-2414.
2. Kotseva K, Wood D, De Backer G, De Bacquer D, Pyörälä K, Reiner Z, Keil U, on behalf of the EUROASPIRE Study Group. EUROASPIRE III. Management of cardiovascular risk factors in asymptomatic high-risk patients in general practice: cross-sectional survey in 12 European countries. *Eur J Cardiovasc Prev Rehabil* 2010;17:530-540.
3. Wood DA, Kotseva K, Jennings C, et al on behalf of the EUROACTION Study Group. EUROACTION: A European Society of Cardiology demonstration project in preventive cardiology. *Eur Heart J* 2004;6(Supplement J):J3-J15.
4. Wood DA, Kotseva K, Connolly S, et al. Nurse-coordinated multidisciplinary, family-based cardiovascular disease prevention programme (EUROACTION) for patients with coronary heart disease and asymptomatic individuals at high risk of cardiovascular disease: a paired, cluster-randomised controlled trial. *Lancet* 2008;371:1999-2012.
5. D'Agostino RB, Vasan RS, Pencina MJ et al. General cardiovascular risk profile for use in primary care. The Framingham Heart Study. *Circulation* 2008;117:743-53.
6. Miller DK, Homan SM. Determining transition probabilities: confusion and suggestion. *Med Decis Making* 1994;14:52-8.



- 1  
2  
3  
4 7. Sutcliffe SJ, Fox KF, Wood DA, et al. Incidence of coronary heart disease in a health  
5  
6 authority in London: review of a community register. *BMJ* 2003;326:20.  
7  
8
- 9  
10 8. Bamford J, Sandercock P, Dennis M, et al. A prospective study of acute  
11  
12 cerebrovascular disease in the community: the Oxfordshire Community Stroke  
13  
14 Project 1981–86. I. Methodology, demography and incident cases of first-ever stroke.  
15  
16 *J Neurol Neurosurg Psychiatry* 1988;51:1373–80.  
17  
18
- 19  
20 9. Dennis MS, Bamford JM, Sandercock PA, Warlow CP. Incidence of transient  
21  
22 ischemic attacks in Oxfordshire, England. *Stroke* 1989;20:333–9.  
23  
24
- 25  
26 10. Ward S, Lloyd Jones M, Pandor A, et al. A systematic review and economic  
27  
28 evaluation of statins for the prevention of coronary events. *Health Technology*  
29  
30 *Assessment* 2007;11(14).  
31  
32
- 33  
34 11. Briggs A, Mihaylova B, Sculpher M, et al. Cost-effectiveness of perindopril in  
35  
36 reducing cardiovascular events in patients with stable coronary artery disease using  
37  
38 data from the EUROPA study. *Heart* 2007;93:1081-6.  
39  
40
- 41  
42 12. Organisation for Economic Co-operation and Development (OECD CPI). OECD  
43  
44 Consumer Price Indices. July 2007. Available at: <http://www.oecd.org/>  
45  
46  
47
- 48  
49 13. Kind P, Dolan P, Gudex C, Williams A. Variations in population health status: results  
50  
51 from a United Kingdom national questionnaire survey. *BMJ* 1998;316:736–41.  
52  
53
- 54  
55 14. National Institute for Health and Clinical Excellence (NICE). Guide to methods of  
56  
57 technology appraisal. London, June 2008.  
58  
59  
60

- 1  
2  
3  
4 15. StataCorp. Stata Statistical Software: Release 10.0. College Station, Texas, USA:  
5  
6 Stata Corporation, 2007.  
7  
8  
9  
10  
11 16. Ridker PM, Buring JE, Rifai N, Cook NR. Development and validation of improved  
12 algorithms for the assessment of global cardiovascular risk in women: the Reynolds  
13 Risk Score. *JAMA* 2007;297:611-9.  
14  
15  
16  
17  
18 17. Woodward M, Brindle P, Tunstall-Pedoe H. SIGN group on risk estimation. Adding  
19 social deprivation and family history to cardiovascular risk assessment: the ASSIGN  
20 score from the Scottish Heart Health Extended Cohort (SHHEC). *Heart* 2007;93:172-  
21 6.  
22  
23  
24  
25  
26  
27  
28  
29 18. Yusuf S, Hawken S, Ounpuu S, et al. Effect of potentially modifiable risk factors  
30 associated with myocardial infarction in 52 countries (the INTERHEART study): case-  
31 control study. *Lancet* 2004;364:937-52.  
32  
33  
34  
35  
36  
37 19. Fleming P, Godwin M. Lifestyle interventions in primary care: systematic review of  
38 randomized controlled trials. *Can Fam Physician* 2008;54:1706-13  
39  
40  
41  
42  
43 20. Imperial Cancer Research Fund OXCHECK Study Group. Effectiveness of health  
44 checks conducted by nurses in primary care: final results of the OXCHECK study.  
45  
46  
47 *BMJ* 1995;310:1099-1104  
48  
49  
50  
51  
52  
53  
54  
55  
56  
57  
58  
59  
60

**Appendix**  
**Table A1: Costs of health states in cost-effectiveness model**

| Health State         | Cost (2006 prices) | Assumption/Source                                                                                                                                                                               | Source                  |
|----------------------|--------------------|-------------------------------------------------------------------------------------------------------------------------------------------------------------------------------------------------|-------------------------|
| Event-Free           | £197               | Based on a mean cost of cardiac-related medication and health care contacts (outside of EUROACTION programme) incurred by all patients during one year follow-up                                | Trial data              |
| Stable Angina        | £383               | Based on 3 times 15 minutes' GP contact plus medication (plus cost of event-free)                                                                                                               | Ward et al, 2007 [10]   |
| Post-stable angina   | £383               | Based on 3 times 15 minutes' GP contact plus medication costs (plus cost of event-free)                                                                                                         | Ward et al, 2007 [10]   |
| Unstable angina      | £674               | Based on 3 times 15 minutes' GP contact plus medication plus 60% of patients are also prescribed clopidogrel (plus cost of event-free)                                                          | Ward et al, 2007 [10]   |
| Post-unstable angina | £383               | Based on 3 times 15 minutes' GP contact plus medication costs (plus cost of event-free)                                                                                                         | Ward et al, 2007 [10]   |
| MI                   | £5,020             | Based on data from Nottingham Heart Attack Register include revascularisation for a proportion of patients, plus primary care and medication costs as unstable angina (plus cost of event-free) | Palmer et al, 2002 [21] |
| Post-MI              | £383               | Based on 3 times 15 minutes' GP contact plus medication costs (plus cost of event-free)                                                                                                         | Ward et al, 2007 [10]   |
| Fatal CHD event      | £1,462             | Based on costs of a fatal MI (plus cost of event-free)                                                                                                                                          | Clarke et al, 2003 [22] |
| TIA                  | £1,351             | Based on medication costs plus costs of test and surgery for appropriate patients (plus cost of event-free)                                                                                     | Ward et al, 2007 [10]   |
| Post-TIA             | £483               | Based on medication costs only (plus cost of event-free)                                                                                                                                        | Ward et al, 2007 [10]   |

|                 |        |                                                                                                                                                |                         |
|-----------------|--------|------------------------------------------------------------------------------------------------------------------------------------------------|-------------------------|
| Stroke          | £8,922 | Based on cost of acute events (mild, moderate and severe stroke) and weighted by distribution of severity of strokes (plus cost of event-free) | Youman et al, 2003 [23] |
| Post-Stroke     | £2,543 | Based on cost of acute events (mild, moderate and severe stroke) and weighted by distribution of severity of strokes (plus cost of event-free) | Youman et al, 2003 [23] |
| Fatal CVD event | £7,832 | Based on cost of fatal stroke (plus cost of event-free)                                                                                        | Youman et al, 2003 [23] |

**Table A2: Utility values for health states used in the model**

| Utility value | Event free | Stable angina | Unstable angina | MI    | TIA   | Stroke |
|---------------|------------|---------------|-----------------|-------|-------|--------|
| 45 - 49       | 0.869      | 0.702         | 0.669           | 0.660 | 0.869 | 0.547  |
| 50 - 54       | 0.848      | 0.685         | 0.653           | 0.644 | 0.848 | 0.533  |
| 55 - 59       | 0.826      | 0.667         | 0.636           | 0.628 | 0.826 | 0.520  |
| 60 - 64       | 0.805      | 0.650         | 0.620           | 0.612 | 0.805 | 0.506  |
| 65 - 69       | 0.784      | 0.633         | 0.604           | 0.596 | 0.784 | 0.493  |
| 70 - 74       | 0.763      | 0.617         | 0.588           | 0.580 | 0.763 | 0.480  |
| 75 - 79       | 0.741      | 0.599         | 0.571           | 0.563 | 0.741 | 0.466  |
| 80 - 84       | 0.720      | 0.582         | 0.544           | 0.547 | 0.720 | 0.453  |
| 85 - 89       | 0.699      | 0.565         | 0.538           | 0.531 | 0.699 | 0.440  |
| 90 - 94       | 0.678      | 0.548         | 0.522           | 0.515 | 0.678 | 0.426  |
| 95 - 99       | 0.656      | 0.530         | 0.505           | 0.499 | 0.656 | 0.413  |
| 100 +         | 0.635      | 0.513         | 0.489           | 0.483 | 0.635 | 0.399  |

Sources: Event free (Kind et al, 1998) [13]; Stable angina (Meslop et al, 2003) [24]; Unstable angina and MI (Goodacre et al, 2004) [25]; TIA (Kind et al, 1998) [13]; Stroke (Tengs et al, 2003) [26]

**Table A3: Regression results from adjusted<sup>#</sup> cost-effectiveness analysis (Duration of effect of intervention beyond the end of the trial = 0 years)**

|                                     | Costs       |                |       |         | QALYs       |                |        |         |
|-------------------------------------|-------------|----------------|-------|---------|-------------|----------------|--------|---------|
|                                     | Coefficient | Standard error | t     | p value | Coefficient | Standard error | t      | p value |
| Group<br>(1 = intervention; 0 = UC) | 474.40      | 54.04          | 8.78  | < 0.001 | -0.009      | 0.016          | -0.56  | 0.575   |
| Gender                              | 1544.10     | 273.27         | 5.65  | < 0.001 | -0.826      | 0.082          | -10.09 | < 0.001 |
| Age                                 | 57.68       | 3.24           | 17.80 | < 0.001 | -0.090      | 0.001          | -92.79 | < 0.001 |
| Gender*Age                          | -33.11      | 4.45           | -7.44 | < 0.001 | 0.017       | 0.001          | 13.12  | < 0.001 |
| Italy                               | 106.34      | 58.58          | 1.82  | 0.070   | -0.022      | 0.018          | -1.26  | 0.206   |
| Spain                               | 89.71       | 60.31          | 1.49  | 0.137   | -0.041      | 0.018          | -2.26  | 0.024   |
| Poland                              | 32.58       | 58.81          | 0.55  | 0.580   | -0.045      | 0.018          | -2.56  | 0.010   |
| Denmark                             | 188.87      | 62.34          | 3.03  | 0.002   | -0.063      | 0.019          | -3.38  | 0.001   |
| Netherlands                         | 162.83      | 61.34          | 2.65  | 0.008   | -0.058      | 0.018          | -3.17  | 0.002   |
| Total cholesterol                   | 3.64        | 0.58           | 6.24  | < 0.001 | -0.001      | 0.000          | -4.32  | < 0.001 |
| HDL cholesterol                     | -13.76      | 1.57           | -8.77 | < 0.001 | 0.002       | 0.000          | 4.29   | < 0.001 |
| Systolic blood pressure             | 13.38       | 1.20           | 11.19 | < 0.001 | -0.002      | 0.000          | -4.70  | < 0.001 |
| Anti-hypertensive drugs             | 346.22      | 41.47          | 8.35  | < 0.001 | -0.051      | 0.012          | -4.12  | < 0.001 |
| Diabetes                            | 588.88      | 46.62          | 12.63 | < 0.001 | -0.116      | 0.014          | -8.35  | < 0.001 |
| Smoking                             | 392.41      | 43.48          | 9.02  | < 0.001 | -0.055      | 0.013          | -4.20  | < 0.001 |

1  
2  
3  
4  
5  
6  
7  
8  
9  
10  
11  
12  
13  
14  
15  
16  
17  
18  
19  
20  
21  
22  
23  
24  
25  
26  
27  
28  
29  
30  
31  
32  
33  
34  
35  
36  
37  
38  
39  
40  
41  
42  
43  
44  
45  
46  
47  
48  
49

|                          |          |        |        |         |        |       |        |         |
|--------------------------|----------|--------|--------|---------|--------|-------|--------|---------|
| Total cholesterol*       | -362.52  | 544.24 | -0.67  | 0.505   | 0.037  | 0.163 | 0.22   | 0.823   |
| HDL cholesterol*         | 238.80   | 536.53 | 0.45   | 0.656   | 0.023  | 0.161 | 0.15   | 0.884   |
| Systolic blood pressure* | 157.56   | 232.32 | 0.68   | 0.498   | -0.066 | 0.070 | -0.94  | 0.346   |
| Anti-hypertensive drugs* | 230.88   | 143.30 | 1.61   | 0.107   | -0.046 | 0.043 | -1.07  | 0.284   |
| Smoking*                 | -302.10  | 226.48 | -1.33  | 0.182   | 0.044  | 0.068 | 0.65   | 0.513   |
| Constant                 | -3068.89 | 280.08 | -10.96 | < 0.001 | 12.572 | 0.084 | 149.96 | < 0.001 |
| Number of observations   | 2,024    |        |        |         | 2,024  |       |        |         |
| R <sup>2</sup>           | 0.472    |        |        |         | 0.896  |       |        |         |

\* Regression model adjusting for the following baseline characteristics: age, gender, age\*gender, country, total and HDL cholesterol, SBP, anti-hypertensive medications, smoking and diabetes.

\* Dummy variables created to indicate missing values for each of the risk characteristics

For peer review only

Table A4: Additional results from the cost-effectiveness model

|                                                | Duration of effect of intervention beyond the end of the trial (model time horizon = 11 <sup>#</sup> years in all cases) |                          |                          |                          |
|------------------------------------------------|--------------------------------------------------------------------------------------------------------------------------|--------------------------|--------------------------|--------------------------|
|                                                | 0 years                                                                                                                  | 2 years                  | 5 years                  | 10 years                 |
| <b>Adjusted costs and QALYs</b>                |                                                                                                                          |                          |                          |                          |
| <b>Controlling for age and gender only</b>     |                                                                                                                          |                          |                          |                          |
| Incremental costs (95% CI)                     | £512 (£438 to £589)                                                                                                      | £491 (£418 to £563)      | £468 (£396 to £541)      | £452 (£378 to £525)      |
| Incremental QALYs (95% CI)                     | -0.016 (-0.036 to 0.004)                                                                                                 | -0.012 (-0.032 to 0.008) | -0.008 (-0.028 to 0.012) | -0.006 (-0.026 to 0.014) |
| ICER                                           | Dominated†                                                                                                               | Dominated†               | Dominated†               | Dominated†               |
| 95% CI                                         | £105,653 to dominated†                                                                                                   | £54,307 to dominated†    | £34,845 to dominated†    | £27,907 to dominated†    |
| % of bootstrapped ICERs <£20k                  | 0.01%                                                                                                                    | 0.10%                    | 0.34%                    | 0.71%                    |
| % of bootstrapped ICERs <£30k                  | 0.19%                                                                                                                    | 0.52%                    | 1.69%                    | 3.11%                    |
| <b>Controlling for age, gender and country</b> |                                                                                                                          |                          |                          |                          |
| Incremental costs (95% CI)                     | £497 (£424 to £571)                                                                                                      | £476 (£404 to £548)      | £453 (£381 to £526)      | £436 (£364 to £509)      |
| Incremental QALYs (95% CI)                     | -0.011 (-0.031 to 0.009)                                                                                                 | -0.007 (-0.027 to 0.013) | -0.003 (-0.023 to 0.017) | -0.001 (-0.021 to 0.019) |
| ICER                                           | Dominated†                                                                                                               | Dominated†               | Dominated†               | Dominated†               |
| 95% CI                                         | £49,903 to dominated†                                                                                                    | £33,290 to dominated†    | £24,001 to dominated†    | £20,342 to dominated†    |
| % of bootstrapped ICERs <£20k                  | 0.07%                                                                                                                    | 0.34%                    | 1.11%                    | 2.32%                    |
| % of bootstrapped ICERs <£30k                  | 0.61%                                                                                                                    | 1.81%                    | 4.78%                    | 7.76%                    |

SD = standard deviation; QALYs = quality-adjusted life years; ICER = incremental cost-effectiveness ratio; CI = confidence interval

<sup>#</sup> 1 year study follow-up period plus a 10 year model

† The intervention is more costly and yield fewer QALYs than usual care



Table A5: Results from matched age-sex analysis

|                                   | Duration of effect of intervention beyond the end of the trial = 10 years (model time horizon = 11* years in all cases) |                          |                          |                          |
|-----------------------------------|-------------------------------------------------------------------------------------------------------------------------|--------------------------|--------------------------|--------------------------|
|                                   | Men < 65 years                                                                                                          | Men >= 65 years          | Women < 65 years         | Women > = 65 years       |
| <b>Unadjusted costs and QALYs</b> |                                                                                                                         |                          |                          |                          |
| Incremental costs (95% CI)        | £413 (£290 to £536)                                                                                                     | £527 (£237 to £817)      | £387 (£304 to £471)      | £546 (£376 to £717)      |
| Incremental QALYs (95% CI)        | 0.040 (-0.016 to 0.096)                                                                                                 | -0.057 (-0.181 to 0.068) | 0.026 (-0.017 to 0.069)  | -0.043 (-0.139 to 0.052) |
| ICER                              | £10,298                                                                                                                 | Dominated†               | £15,006                  | Dominated†               |
| <b>Adjusted costs and QALYs‡</b>  |                                                                                                                         |                          |                          |                          |
| Incremental costs (95% CI)        | £457 (£282 to £631)                                                                                                     | £360 (£83 to £803)       | £430 (£313 to £548)      | £466 (£222 to £710)      |
| Incremental QALYs (95% CI)        | -0.008 (-0.063 to 0.048)                                                                                                | -0.014 (-0.212 to 0.183) | -0.011 (-0.041 to 0.020) | -0.000 (-0.052 to 0.051) |
| ICER                              | Dominated†                                                                                                              | Dominated†               | Dominated†               | Dominated†               |

SD = standard deviation; QALYs = quality-adjusted life years; ICER = incremental cost-effectiveness ratio; CI = confidence interval

\* 1 year study follow-up period plus a 10 year model

† The intervention is more costly and yield fewer QALYs than usual care

‡ Adjusting for the following baseline characteristics: age, gender, age\*gender, country, total and HDL cholesterol, SBP, anti-hypertensive medications, smoking and diabetes.

Figure A1: Adjusted cost-effectiveness results

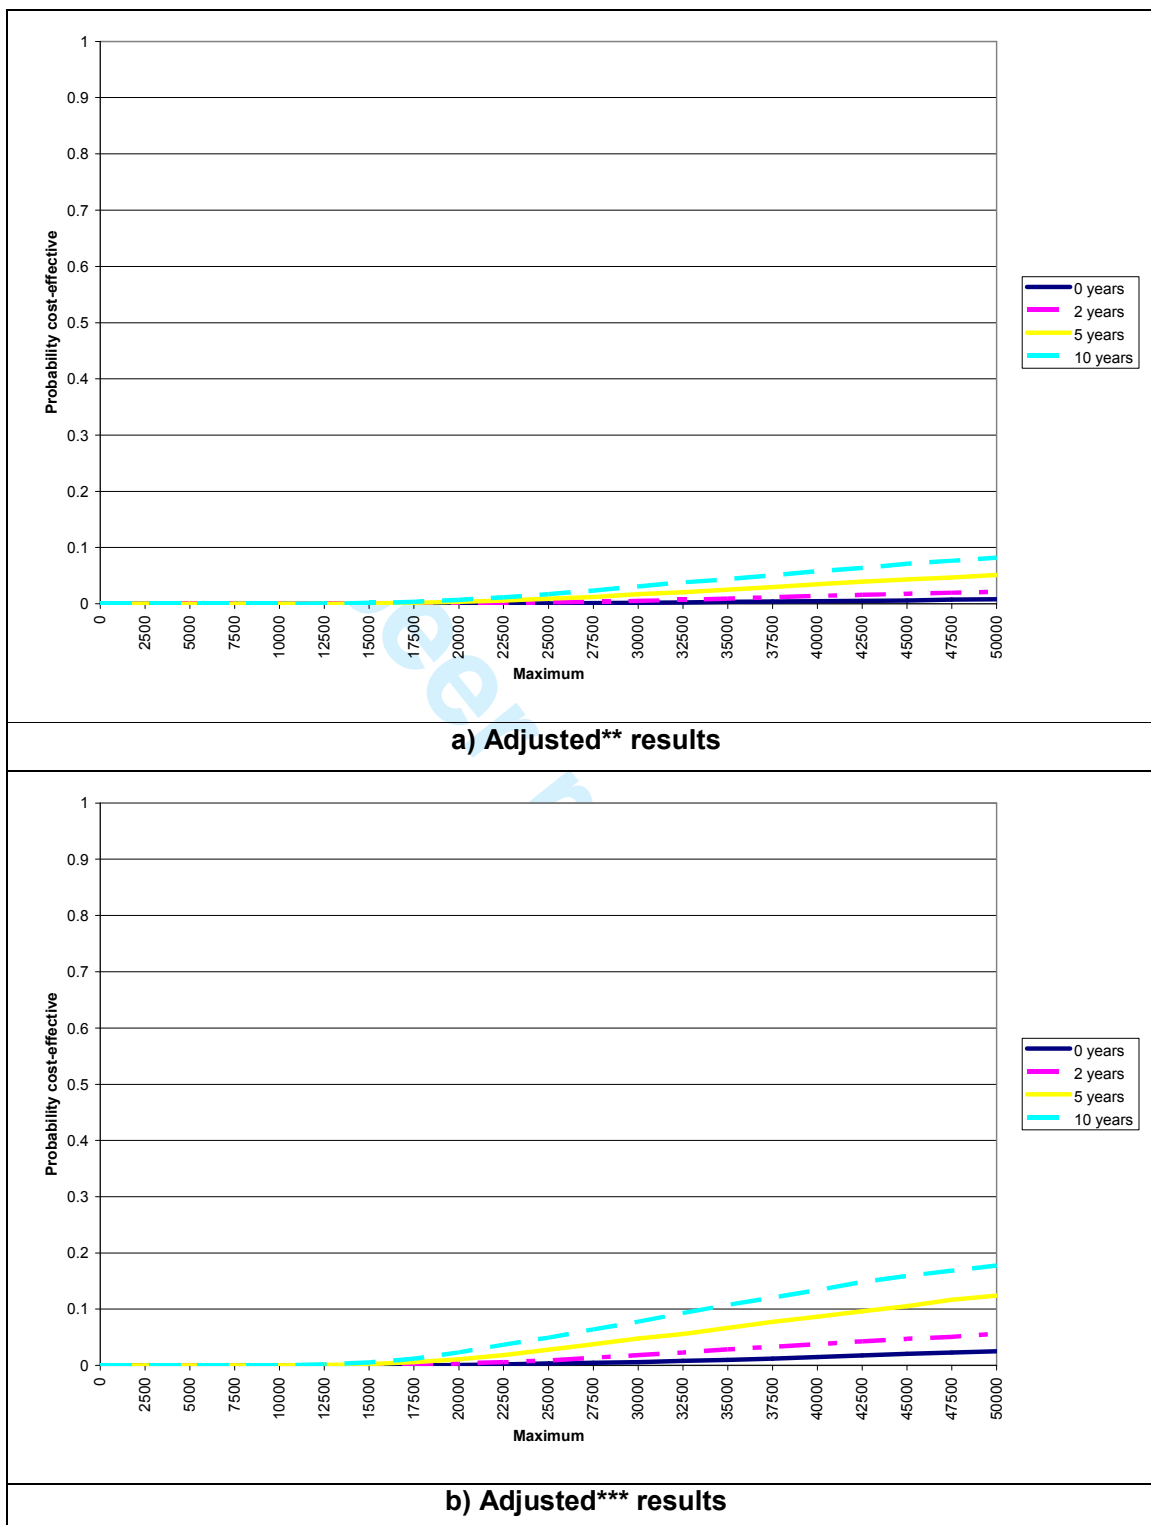

\*\* Adjusted for differences between groups by age and gender

\*\*\* Adjusted for differences between groups by age, gender and country

**Additional References for Appendix**

- 1  
2  
3  
4  
5  
6  
7  
8  
9  
10  
11  
12  
13  
14  
15  
16  
17  
18  
19  
20  
21  
22  
23  
24  
25  
26  
27  
28  
29  
30  
31  
32  
33  
34  
35  
36  
37  
38  
39  
40  
41  
42  
43  
44  
45  
46  
47  
48  
49  
50  
51  
52  
53  
54  
55  
56  
57  
58  
59  
60
21. Palmer S, Sculpher M, Philips Z, et al. A cost-effectiveness model comparing alternative management strategies for the use of glycoprotein IIb/IIIa antagonists in non-ST-elevation acute coronary syndrome. Report to the National Institute for Health and Clinical Excellence. <http://www.nice.org.uk/Docref.asp?d=32030>. London: NICE; 2002.
22. Clarke P, Gray A, Legood R, Briggs A, Holman R. The impact of diabetes-related complications on healthcare costs: results from the United Kingdom Prospective Diabetes Study (UKPDS Study No. 65). *Diabet Med* 2003;20:442–50.
23. Youman P, Wilson K, Harraf F, Kalra L. The economic burden of stroke in the United Kingdom. *Pharmacoeconomics* 2003;21(Suppl 1):43–50.
24. Meslop K, Boothroyd DB, Hlatky MA. Quality of life and time trade-off utility measures in patients with coronary artery disease. *Am Heart J* 2003;145:36–41.
25. Goodacre S, Nicholl J, Dixon S, et al. Randomised controlled trial and economic evaluation of a chest pain observation unit compared with routine care. *BMJ* 2004;328:254.
26. Tengs TO, Lin TH. A meta-analysis of quality of life estimates for stroke. *Pharmacoeconomics* 2003;21:191–200.

1  
2  
3  
4  
5  
6  
7  
8  
9  
10  
11  
12  
13  
14  
15  
16  
17  
18  
19  
20  
21  
22  
23  
24  
25  
26  
27  
28  
29  
30  
31  
32  
33  
34  
35  
36  
37  
38  
39  
40  
41  
42  
43  
44  
45  
46  
47  
48  
49  
50  
51  
52  
53  
54  
55  
56  
57  
58  
59  
60

## Cost-effectiveness of a European preventive cardiology programme in primary care: a Markov modelling approach

Hema Mistry<sup>\*ab</sup>

Stephen Morris<sup>c</sup>

Matthew Dyer<sup>d</sup>

Kornelia Kotseva<sup>e</sup>

David Wood<sup>e</sup>

Martin Buxton<sup>ba</sup>

and on behalf of the EUROACTION study group

<sup>a</sup>[Health Economics Unit, University of Birmingham, Birmingham, B15 2TT, UK](#)

<sup>ba</sup>[Health Economics Research Group, Brunel University, Uxbridge, UB8 3PH, UK](#)

<sup>b</sup>[Health Economics Unit, University of Birmingham, Birmingham, B15 2TT, UK](#)

<sup>c</sup>[Department of Applied Health Research Health Care Evaluation Group, University College London, London, WC1E 6BT, UK](#)

<sup>d</sup>[National Institute for Health and Clinical Excellence, Midcity Place, 71 High Holborn, London, WC1V 6NA, UK](#)  
[Creativ Ceutical, 29-30 Windmill Street, London, W1T 2JL, UK](#)

Formatted: Not Superscript/ Subscript

<sup>e</sup>Department of Cardiovascular Medicine, International Centre for Circulatory Health, National Heart and Lung Institute, Imperial College London, London, W2 1LA, UK

\*Corresponding author:

Dr Hema Mistry

Research Fellow in Health Economics

Health Economics Unit

University of Birmingham

1  
2  
3  
4  
5  
6  
7  
8  
9  
10  
11  
12  
13  
14  
15  
16  
17  
18  
19  
20  
21  
22  
23  
24  
25  
26  
27  
28  
29  
30  
31  
32  
33  
34  
35  
36  
37  
38  
39  
40  
41  
42  
43  
44  
45  
46  
47  
48  
49  
50  
51  
52  
53  
54  
55  
56  
57  
58  
59  
60

Edgbaston  
Birmingham, UK, B15 2TT  
Tel. +44 (0)121 414 8970  
Email: [H.Mistry@bham.ac.uk](mailto:H.Mistry@bham.ac.uk)

For peer review only



1  
2  
3  
4  
5  
6 **Abstract (word count 3096)**  
7  
8

9  
10 **Objective:** To investigate the longer-term cost-effectiveness of a nurse-coordinated  
11 preventive cardiology programme for primary prevention of cardiovascular disease  
12 compared to routine practice from a health service perspective.  
13  
14

15  
16  
17 **Design:** A matched, paired cluster-randomised controlled trial.  
18  
19

20 **Setting:** Six pairs of general practices in six countries.  
21  
22

23  
24 **Participants:** 1,019 patients were randomised to the EUROACTION intervention  
25 programme and 1,005 patients to usual care and who completed the one-year follow-up-  
26  
27

28  
29 **Outcome measures:** Evidence on health outcomes and costs were based on patient level  
30 data from the study, which had a one-year follow-up period. Future risk of cardiovascular  
31 (CVD) events was modelled, using published risk models based on patient characteristics.  
32 An individual level Markov model for each patient was used to extrapolate beyond the end of  
33 the trial, which was populated with data from published sources. We used an 11-year time  
34 horizon and investigated the impact on cost-effectiveness of varying the duration of the  
35 effect of the intervention beyond the end of the trial. Results are expressed as incremental  
36 cost per quality-adjusted life year gained.  
37  
38  
39  
40  
41  
42  
43

44  
45 **Results:** Unadjusted results found the intervention to be more costly and also more effective  
46 than usual care. However, after adjusting for differences in age, gender, country and  
47 baseline risk factors, the intervention was dominated by usual care, but this analysis was not  
48 able to take into account of lifestyle changes in terms of diet and physical activity.  
49  
50  
51  
52  
53  
54  
55  
56  
57  
58  
59  
60

1  
2  
3  
4  
5  
6 **Conclusions:** Although the EUROACTION study achieved healthier lifestyle changes and  
7 improvements in management of blood pressure and lipids for patients at high risk of CVD,  
8 compared to usual care, it was not possible to show, using available risk equations which do  
9 not incorporate diet and physical activity, that the intervention reduced longer-term  
10 cardiovascular risk cost-effectively. Whether or not an intervention such as that offered by  
11 EUROACTION is cost-effective requires a longer term trial with major cardiovascular events  
12 as the outcome.  
13  
14  
15  
16  
17  
18  
19  
20  
21  
22  
23  
24  
25  
26  
27  
28  
29  
30  
31  
32  
33  
34  
35  
36  
37  
38  
39  
40  
41  
42  
43  
44  
45  
46  
47  
48  
49  
50  
51  
52  
53  
54  
55  
56  
57  
58  
59  
60

## Article summary

### Article focus

- To investigate the longer-term cost-effectiveness of a nurse-coordinated preventive cardiology programme for primary prevention of cardiovascular disease compared to routine practice.

### Key messages

- The EUROACTION study achieved healthier lifestyle changes and improvements in management of blood pressure and lipids for patients at high risk of CVD, compared to usual care.
- The unadjusted results of the cost-effectiveness analysis found the intervention to be more effective than usual care but also more costly. However, the adjusted results showed that the intervention was dominated by usual care.
- The published cardiovascular risk equations do not take account of lifestyle changes in terms of diet and physical activity and therefore may be inadequate for the evaluation of whether or not a lifestyle intervention to prevent cardiovascular disease is cost-effective.

### Strengths and limitations of the study

- This is the first study assessing the cost-effectiveness of the EUROACTION programme.
- The available cardiovascular risk modelling is based on a limited number of risk factors, which do not include measures of diet or physical activity, and a healthier lifestyle was the most important outcome of the EUROACTION trial.

**Trial Registration number:** ISRCTN 71715857

**Keywords:** Multi-centre studies; cardiovascular prevention programme; cost-effectiveness; Markov model; QALYs.

**Text word Count:** 3,415064



## Introduction

Evidence has shown that individuals with increased risk of cardiovascular disease (CVD) can reduce their risk of cardiovascular morbidity and mortality by stopping smoking, changing their diet, engaging in physical activity, achieving a healthy body weight, and controlling their blood pressure, cholesterol and diabetes.[1] However, not all patients at high risk of developing CVD manage to achieve these recommended lifestyle and risk factor goals and there remains considerable potential to reduce CVD risk in these patients.[2] The EUROACTION study was designed to address the need for preventive cardiology care in everyday clinical practice.[3]

The EUROACTION study was a matched, paired cluster-randomised controlled trial, across eight countries and 24 hospitals and general practices. The project evaluated the impact of a nurse-coordinated, multidisciplinary preventive cardiology programme for coronary patients in hospital and high risk individuals in general practice. It aimed to help all these high risk patients and their families to achieve recommended lifestyle and risk factor targets for CVD prevention in everyday clinical practice over one year. The principal results concluded that the EUROACTION programme achieved healthier lifestyle changes and improvements in risk factor management for patients with coronary heart disease (CHD) and those at high risk of CVD, together with their partners, compared to usual care.[4]

While there is evidence that the EUROACTION programme is effective in terms of modifying lifestyle and some CVD risk factors, there is no evidence as to its cost-effectiveness.

Therefore, this paper aims to model the long-term cost-effectiveness of the EUROACTION programme in comparison with usual care within the primary care setting.

## Methods

### *Patients*

1  
2  
3  
4  
5  
6 The EUROACTION primary care study took place in Denmark, Italy, Netherlands, Poland,  
7 Spain and UK, where a matched pair of general practices was identified, and then  
8 randomised to either the EUROACTION programme or to usual care (UC). GPs  
9 prospectively identified the study population. The comparison was restricted to patients and  
10 did not include partners. Eligibility criteria for patients has previously been published.[4]  
11  
12  
13  
14

15  
16 All intervention patients were assessed at baseline and one-year. These assessments  
17 focussed on smoking habits, diet and physical activity, measurement of body mass index,  
18 blood pressure, cholesterol and glucose levels, and cardiac medications were also recorded.  
19  
20 The programme was delivered by specialist nurses, working with GPs, and supported by  
21 software programmes (HEARTSCORE), educational materials and group workshops to  
22 achieve individual goals. Each person was given a personal record card to record lifestyle  
23 and risk factor goals, medications and appointments. To avoid the possibility that  
24 undergoing baseline assessments might affect outcomes, only a random sub-sample  
25 (~25%) of UC patients were seen at baseline and then all UC patients were invited for  
26 assessment at one-year. In the UC arm, patients did not receive any form of special care.  
27  
28  
29  
30  
31  
32  
33  
34  
35

### 36 **Model structure**

37 We adopted a health service perspective to measure costs and outcomes. Each cycle in the  
38 model is of one year's duration. All patients were CVD-free on entering the model. In each  
39 subsequent cycle patients may remain CVD-event free, they may have a fatal or non-fatal  
40 CVD event, or they may die from non-CVD causes. Once the patient has had an initial CVD  
41 event, then in subsequent cycles they move to the post CVD-event states and they may  
42 move between different CVD states and/or die from CVD or non-CVD causes.  
43  
44  
45  
46  
47  
48  
49

50 The CVD event states are: non-fatal myocardial infarction (MI), stable angina, unstable  
51 angina, CHD death, transient ischaemic attack (TIA), stroke, CVD death and non-CVD  
52 death.  
53  
54  
55  
56  
57  
58  
59  
60

### ***Measuring initial CVD risk***

To estimate the risk of an initial CVD event in a subsequent year we used the D'Agostino et al [5] CVD risk function, derived from the Framingham Heart Study. This calculates individual sex-specific risks for future cardiovascular events (in patients initially free of CVD). These CVD risk equations incorporate as risk factors the natural logarithms of age, total and HDL cholesterol, systolic blood pressure (SBP) if treated with or without anti-hypertensive medications, smoking and diabetes. We used the published calibration factors to focus on the CHD and stroke event states.

Ten-year risks were estimated from the equations and adjusted to one-year values.[6] One-year CVD risk beyond the end of the trial was calculated based on both a) baseline patient characteristics (adjusted for age) for intervention patients only; and b) one-year follow-up characteristics for both groups, in order to evaluate any changes to CVD risk factors as a result of the EUROACTION programme.

### ***Validating the appropriateness of the risk functions of the model***

We tested the validity of applying the D'Agostino et al [5] risk equations to the study population, by comparing the observed number of CHD cases with the number predicted at one-year. Because stroke and TIA incidence data was not collected in the study we converted the CVD risk equations to CHD risks using the recommended calibration factors.[5] We present the results of the comparison for both groups.

### ***Transition probabilities***

We disaggregated the overall risk of a CVD event into rates for specific events by age and gender, using UK relative incidence rates based on published literature [7-9] and expert opinion, as previously used in Ward et al [10]. These event rates were applied to individual annual CVD risks to calculate individual transition probabilities for moving from the CVD-free

1  
2  
3  
4  
5  
6 state to the initial CVD-event states. Also, individual patients could die from non-vascular  
7 causes, depending on their age and gender. The non-CVD death transition probabilities  
8 were taken from Briggs et al.[11] Transition probabilities for moving from primary event  
9 health states to subsequent non-fatal health states are taken from Ward et al.[10]  
10  
11  
12

### 13 14 15 **Measuring cost**

16 Data on resources used during the trial and staff contacts were recorded in case record  
17 forms and then converted into electronic format. To determine the total one-year costs for  
18 each group, we obtained unit costs for all relevant items of resources used in the trial:  
19  
20  
21

22  
23  
24 *1. Costs relating to EUROACTION programme and other contacts in primary care* were  
25 obtained from the programme facilitators and included the EUROACTION nurses costs,  
26 training costs, production of patient educational materials and any other costs  
27 associated with implementing the programme. The average time spent by staff for all  
28 patient contacts at baseline and one-year was provided by each centre. Hourly wage  
29 rates of the staff salaries and training were calculated and then applied to these various  
30 patient contacts. We costed the EUROACTION family information packs, a pocket-  
31 sized personal record card, questionnaires and group sessions that each patient in the  
32 intervention group received as part of their prevention programme.  
33  
34  
35  
36  
37  
38  
39

40  
41 Costs were applied to other contacts with health care professionals, such as GPs,  
42 outside of the intervention programme for both arms and these costs were based on  
43 national estimates of the staff salaries involved and estimates of the average time spent  
44 with the patient provided by the trial co-ordinators.  
45  
46  
47  
48

49  
50 *2. Cardiac-related drug costs.* Data was collected on patient-specific cardiac-related  
51 medications including the drug name and dose at baseline and one-year. This gave  
52 point of time information, but no start or end dates. So for each patient it was assumed  
53  
54  
55  
56

1  
2  
3  
4  
5  
6 that they would remain on the same medication at a constant dose for the entire  
7 duration e.g. from baseline to one-year. National cost estimates for the drugs were  
8 provided by trial co-ordinators from each country and were applied accordingly to the  
9 relevant dose and length of time on a patient-specific basis.  
10  
11  
12

13  
14  
15 *3. Cardiac-related procedures and tests.* During the trial, patients within both groups  
16 may have required inpatient or outpatient admissions for cardiac-related procedures, or  
17 undertaken any cardiac-related tests. The procedures were costed according to HRG  
18 episodes for each country and the other tests or bed days as simple unit costs.  
19  
20 National unit cost estimates for cardiac-related procedures and tests for each country  
21 were obtained from a database held by United BioSource Corporation (Erwin De Cock,  
22 personal communication, May 2007) for all countries, except Denmark and Poland. For  
23 these two countries, national unit cost estimates were provided from contacts within the  
24 Centre for Applied Health Services Research and Technology in Denmark (Jan  
25 Sørensen, personal communication, January 2007) and from the Ministry of Health in  
26 Poland (Andrzej Pająk, personal communication, June 2007).  
27  
28  
29  
30  
31  
32  
33  
34  
35

36 As the study was based in six countries, a costing algorithm was developed to calculate a  
37 total cost per patient for each country. The costs of the programme were valued in local  
38 currencies and then converted to 2006/2007 £ (GBP) using purchasing power parities.[12]  
39  
40

41 Table 1 presents the total one-year costs by group and country. Figure 1a shows that the 1-  
42 year observed costs (split by type of cost) for the intervention group was significantly more  
43 than the usual care group for all countries. This higher cost was explained by the  
44 EUROACTION intervention programme costs and contacts with EUROACTION staff, whilst  
45 neither arms experienced significantly high cost cardiac interventions or cardiac medications.  
46  
47  
48  
49  
50

51  
52 Subsequent costs relating to health states occupied within the model were based on UK  
53 estimates (see Appendix). It was assumed that patients in a CVD-free state would continue  
54  
55  
56  
57  
58  
59  
60

1  
2  
3  
4  
5  
6 to receive the cardiac-related medications and primary care contacts (outside of the  
7 intervention programme) that they received during the trial. The mean cost of these  
8 medications and contacts for all patients across both arms was applied to each individual  
9 patient within the model who remained in the event-free health state for subsequent years.  
10  
11  
12

### 13 14 15 **Health state utilities**

16  
17 To estimate quality-adjusted life years (QALYs) the model requires utility values for each  
18 state adjusted by age. For patients who were event-free, the utility values were based on  
19 UK general population norms [13]; utilities for events/states were taken from Ward et al [10]  
20 which were all were based on UK studies and were obtained using the EQ-5D (see  
21 Appendix).  
22  
23  
24

### 25 26 27 **Measuring the impact of the intervention**

28  
29 The study provided results only for a one-year follow-up. We estimated results for a range of  
30 possible durations of effect, assuming that the CVD risk reduction experienced by the  
31 intervention patients persisted for 0 through to 10 additional years (11-year time horizon),  
32 after which they reverted to their individual CVD risk factor levels at the start of the study  
33 (adjusted for age). For UC patients, it was assumed that patients would remain at their one-  
34 year CVD risk (adjusted annually by age) throughout the model.  
35  
36  
37  
38  
39  
40

### 41 42 **Measuring cost-effectiveness**

43  
44 Using the Markov model we calculated for each patient their expected quality-adjusted  
45 survival (based on their likelihood of surviving each cycle and their expected health state  
46 utility value) and their expected costs. Cost-effectiveness was measured in terms of the  
47 incremental cost per QALY gained (ICER). Future costs and benefits were discounted at  
48 3.5%. [14]  
49  
50  
51  
52

### 53 54 **Statistical analyses**

1  
2  
3  
4  
5  
6 All statistical analyses were performed in Stata version 10 [15] or Microsoft Excel and a p-  
7 value  $\leq 0.05$  was considered to be statistically significant. We present unadjusted and  
8 adjusted cost-effectiveness results. The adjusted results controlled for group allocation, age,  
9 gender, age\*gender interactions, country, and baseline risk factors using OLS regressions.  
10 As only a random sub-sample of UC patients were seen at baseline, regression analyses  
11 were used to predict baseline values for those patients who had missing values. For total  
12 and HDL cholesterol and SBP, OLS regression was used to predict values in those patients  
13 with missing values, as a function of age, gender and country. For the three binary variables  
14 (medications, smoking and diabetes), logistic regression models were used to predict the  
15 probability of each binary outcome. Predicted values  $\geq 0.5$  were categorised to a value of 1  
16 and values  $< 0.5$  were categorised as 0. In the adjusted models we also included an  
17 indicator for whether or not each control variable was missing.  
18  
19  
20  
21  
22  
23  
24  
25  
26  
27  
28

29 ~~Bootstrapping was undertaken on both unadjusted and adjusted costs and effects using~~  
30 ~~10,000 replications to provide 95% confidence intervals around the mean. Probabilistic~~  
31 ~~sensitivity analyses were conducted to obtain cost-effectiveness acceptability curves~~  
32 ~~(CEACs).~~  
33

34 We represented uncertainty due to sampling variation in both the unadjusted and adjusted  
35 cost-effectiveness ratios using non-parametric bootstrapping. In the unadjusted analyses we  
36 sampled individuals in our model with replacement and used their costs and outcomes over  
37 the 11-year period to compute replications of the incremental cost per QALY gained. We  
38 repeated this approach in the adjusted analyses, also adding the regressions to control for  
39 confounding factors. In each case, we generated 10,000 bootstrap replications of the cost-  
40 effectiveness ratios and used these to construct 95% confidence intervals around the point  
41 estimate of cost-effectiveness.  
42  
43  
44  
45  
46  
47  
48  
49  
50

### 51 **Sensitivity analysis**

52  
53  
54  
55  
56  
57  
58  
59  
60

1  
2  
3  
4  
5  
6 The main analysis modelling was limited to ten years, in the absence of robust longer-term  
7 risk models. As a sensitivity analysis, we used a simplified longer-term model to check  
8 whether the conclusions of the main analysis would have been likely to be different if a  
9 longer-term perspective had been adopted e.g. 25 years. This model essentially assumed  
10 no further effect of the intervention but modelled out fully the possible QALY gains from the  
11 medium-term (11 year) differences in mortality and event rates.  
12  
13  
14  
15  
16  
17

## 18 Results

19  
20 The baseline characteristics for the intervention group as a whole and the usual care  
21 subsample who were seen at baseline are shown in Table 2. There were significant  
22 differences in the distribution between countries. Mean total and HDL cholesterol levels  
23 were significantly higher for the intervention compared with the UC group. Whilst no  
24 statistically significant differences were observed for other baseline characteristics, but the  
25 10-year CVD risk at baseline [5] was numerically higher for the UC group than the  
26 intervention arm.  
27  
28  
29  
30  
31  
32  
33

34 We modelled 1,019 patients in the intervention arm and 1,005 patients in the UC arm who  
35 were assessed at one-year.[4] The intervention group had fewer males than the UC group:  
36 49.8% vs. 57.4% male ( $p=0.001$ ), and was significantly younger (mean age at one-year:  
37 intervention: 61.5 years vs. usual care: 62.3 years,  $p=0.011$ ).  
38  
39  
40  
41  
42

43 When testing the validity of the Framingham risk equations to the study population we found  
44 that 8 intervention patients and 1 UC sub-sample patient experienced a CHD-event. The  
45 risk equations produced a close match, predicting 8.5 patients with a first CHD-event in the  
46 intervention group and 2.0 in the UC sub-sample.  
47  
48  
49  
50  
51

52 Figure 1b further emphasises that the observed additional costs of the EUROACTION  
53 intervention programme and staff costs were not offset by the estimated reduced costs of  
54  
55  
56  
57  
58  
59  
60



1  
2  
3  
4  
5  
6 cardiac interventions in the subsequent years. In terms of the unadjusted results, the  
7 incremental costs of the intervention are £362-£419 depending on the duration of the effect  
8 of the intervention and the incremental QALYs are 0.076-0.085 (see Table 32). As  
9 expected, the incremental costs fall and the incremental QALYs rise as the duration of the  
10 effect of the intervention beyond the end of the trial increases. The incremental cost per  
11 QALY gained range from £5,539 (95% CI £2,625-£29,627) to £4,266 (95% CI £2,059-  
12 £15,945). The unadjusted CEACs under each scenario are in Figure 24a and highlights the  
13 results in Table 32 that in all scenarios over 95% of the bootstrapped replications are less  
14 than £20,000.

15  
16  
17  
18  
19  
20  
21  
22  
23  
24 After controlling for differences in age, gender, country and baseline risk factors, the  
25 intervention is associated with higher costs and lower QALYs than the UC arm in every  
26 scenario (an example of the various regression models is shown in the Appendix). As a  
27 result, the intervention is dominated by UC. Although there is considerable uncertainty  
28 around those point estimates with the 95% confidence intervals ranging from acceptably  
29 cost-effective to highly dominated, but the probability of being cost-effective are very low, as  
30 shown in ~~T~~the adjusted CEACs are in Figure 4b-2b (additional adjusted CEACs, controlling  
31 for age, gender and country only are in the Appendix). At a cost-effectiveness threshold of  
32 £20,000 the EUROACTION intervention will be cost-effective in under 6% of cases.

33  
34  
35  
36  
37  
38  
39  
40  
41 Due to baseline differences, we conducted age-sex matched subgroup analyses and the  
42 adjusted results confirmed that the intervention remained dominated, even when an  
43 optimistic timeframe was considered (an example of age-sex matched subgroup analysis is  
44 shown in the Appendix).

45  
46  
47  
48  
49  
50 The sensitivity analysis produced predictable results that in no way changed the conclusions  
51 of the analysis. Using the unadjusted data, the cost-effectiveness of the intervention was

1  
2  
3  
4  
5  
6 further enhanced, and using the adjusted data the domination of UC over the intervention  
7  
8 remained.

## 11 Discussion

13 Although this large European trial demonstrated that a nurse-coordinated preventive  
14 cardiology programme in primary care helped more high risk patients to achieve the lifestyle  
15 and risk factor targets in comparison with UC this does not appear to be cost-effective.  
16  
17

18 However, these cost-effectiveness analyses require careful qualification because they are  
19 subject to a number of uncertainties which are a consequence of the study design and  
20 important limitations in the statistical model used.  
21  
22

23  
24  
25 The differences in the adjusted and unadjusted results emphasise that the study design,  
26 based on matching pairs of general practices in each country, did not eliminate baseline  
27 differences between the two groups in cardiovascular risk factors. These differences meant  
28 that the two groups had different levels of baseline risk, higher in intervention than usual  
29 care, but the economic results have adjusted for these baseline differences. Though these  
30 differences were small in absolute terms they have a substantial effect on the estimates of  
31 absolute risk of future cardiovascular events, and therefore on the difference in effectiveness  
32 between intervention and UC. Additionally, the study recorded its primary endpoints at  
33 baseline and one-year, and to avoid 'contamination' by recording risk factor levels in UC,  
34 baseline measurements were only made in a sub-sample of UC patients. Thus, we do not  
35 have before and after measurements for 75% of the UC patients.  
36  
37  
38  
39  
40  
41  
42  
43  
44

45  
46  
47 Our cost-effectiveness analysis did not include partners. If partners were included it might  
48 improve the cost-effectiveness, but we have no good measure of the effect on partners to  
49 know how substantial the impact on the incremental cost-effectiveness ratio might be.  
50  
51  
52  
53  
54  
55  
56  
57  
58  
59  
60

Formatted: Plain Text

1  
2  
3  
4  
5  
6 Our estimates of the risk of future CVD-events are based on published risk equations.[5]  
7 These are derived from a large, well characterised cohort (8491 participants) and predict  
8 CVD risk as opposed to CHD risk alone. The C statistic for the model ranges from 0.76  
9 (men) to 0.79 (women) suggesting that additional risk factors could potentially improve the  
10 model's discriminatory power. Other risk models have included risk factors such as family  
11 history of CVD, social deprivation and biomarkers e.g. hs-CRP [16-17] although these  
12 models also have their own limitations.  
13  
14  
15  
16  
17  
18

19  
20 However, to date lifestyle factors such as dietary habits and physical inactivity although  
21 important in the aetiology of CHD [18] and independent of the other major risk factors, have  
22 not been included in such risk scores, because they are difficult to accurately quantify. The  
23 omission of these important lifestyle factors in the Framingham risk equations may be  
24 particularly relevant in our study as the cornerstone of the EUROACTION programme was  
25 lifestyle change which was clearly evident in the study's most striking achievements in this  
26 area including significantly higher fruit and vegetable consumption ( $p = 0.005$ ); physical  
27 activity levels ( $p = 0.01$ ); and weight loss ( $p = 0.005$ ).  
28  
29  
30  
31  
32  
33  
34  
35

36 It is thus possible that our estimates of relative differences in absolute risk between the  
37 groups may understate the full effects of the intervention on long-term CVD risk. However,  
38 we showed that the risk equations are able to predict CHD events in the study population in  
39 the one-year follow-up period, but the accuracy of the risk equations over the ten-year period  
40 of our study remains untested.  
41  
42  
43  
44  
45

46 Our modelling also requires an assumption about how long any differential effect of the  
47 intervention persists. Nothing is known about the longer-term effects of EUROACTION, and  
48 there are few studies that have looked at longer-term changes. The longest follow-up to a  
49 relevant life-style change appears to be the OXCHECK study which showed that the benefits  
50 of health checks were sustained over three years.[19-20] However, whatever the duration  
51  
52  
53  
54  
55  
56  
57  
58  
59  
60

1  
2  
3  
4  
5  
6 of effect beyond the trial, and even when a 25-year model was used, the policy conclusions  
7 remain the same.  
8  
9

10  
11 Finally, our model uses a regression analysis approach so that a UK specific estimate can  
12 be drawn from the complete multinational EUROACTION dataset on net resource use, costs  
13 and net effects of the intervention. The epidemiological, utilities and cost data for the longer-  
14 term modelling of risk and events is based on UK data alone. Thus, the results are  
15 applicable to the UK and not specifically to the other EUROACTION countries. Whilst formal  
16 analysis would be needed to confirm this, the coefficients on the country parameters in the  
17 regression analyses of both costs and outcomes suggest that the cost-effectiveness would  
18 be broadly similar in the other countries.  
19  
20  
21  
22  
23  
24  
25  
26

## 27 **Conclusion**

28  
29 Although the EUROACTION study demonstrated in high risk patients in primary care  
30 significant improvements in lifestyle and CVD risk factors, it is not possible to show, using  
31 the best available risk equations, that the intervention was cost-effective. The available risk  
32 modelling is based on a limited number of risk factors, which do not include diet or physical  
33 activity, and a healthier lifestyle was the most important outcome of this trial. Therefore,  
34 whether or not an intervention such as that offered by EUROACTION is cost-effective  
35 remains an open question that could be answered by a longer-term trial with major adverse  
36 cardiovascular events as the primary endpoint.  
37  
38  
39  
40  
41  
42  
43  
44  
45  
46  
47  
48  
49  
50  
51  
52  
53  
54  
55  
56  
57  
58  
59  
60

## Acknowledgements

### *EUROACTION Steering Group*

A scientific steering group approved the protocol and the design for this matched pair cluster-randomised controlled trial, and is responsible for the scientific integrity of the study.

The steering group has the following membership: D Wood (London, UK, Chairman), G De Backer (Ghent, Belgium), D De Bacquer (Ghent, Belgium), M Buxton (Uxbridge, UK), I Graham (Dublin, Ireland), A Howard (Nice, France), K Kotseva (London, UK), S Logstrup (Brussels, Belgium), H McGee (Dublin, Ireland), M Mioulet (Nice, France), K Smith (Dundee, UK), D Thompson (York, UK), T Thomsen (Glostrup, Denmark), T van der Weijden (Maastricht, the Netherlands).

### *National co-ordinators*

The national co-ordinators for each country are also members of the steering committee.

They are responsible for identifying and recruiting general practices, obtaining ethics committee approval, appointing and supervising staff in the centres and contributing scientifically to the publication of results. The EUROACTION National Co-ordinators and Primary care leaders are as follows:

Denmark: T Thomsen, K Brockelmann; Italy: P Fioretti, A Desideri, S Brusaferrò; Poland: A Pajak, K. Kawecka-Jaszcz, P Jankowski, T Grodzicki; Spain: J De Velasco, A Maiques; Netherlands: T van der Weijden; United Kingdom: D Wood, J Morrell.

### *Co-ordinating and Data Management Centre*

The Co-ordinating and Data Management Centre is the Department of Cardiovascular Medicine, National Heart and Lung Institute at Charing Cross Campus, Imperial College, London, UK (Head Professor David Wood). The following staff have specific responsibilities as described: K Kotseva, Senior Clinical Research Fellow; S Connolly, Research Fellow; C Jennings, Study Nurse Co-ordinator; A Mead, Chief Dietician; J Jones, Superintendent

1  
2  
3  
4  
5  
6 Physiotherapist; A Holden, Physical activity Co-ordinator; T Collier, Statistician; M Alston, D  
7 Charlesworth, P Homewood, K Pandya, M Somaia, IT specialists/Data managers; S Graves,  
8 Research Administrator; W Leacock, D Xenikaki, Administrative Assistants. The following  
9 experts advised the Co-ordinating Centre on dietary and physical activity assessment:  
10  
11 Professor Gary Frost, Professor Barry Margetts, Dr Mike Nelson and Dr Charlie Foster.  
12  
13  
14

#### 15 16 17 *Central Laboratory*

18 Central Laboratory analysis of total cholesterol, HDL cholesterol, triglycerides, glucose and  
19 HbA1c are undertaken by A McLelland, R Birrell and G Beastall in the Department of  
20 Pathological Biochemistry, Royal Infirmary, Glasgow (Head of Department J Shepherd).  
21  
22  
23

#### 24 25 26 *Statistical Centres*

27 The statistical analyses for the primary endpoints were undertaken by D De Bacquer,  
28 Statistician, from the Department of Public Health (Head of Department G De Backer),  
29 Ghent University, Belgium, and supplementary analyses by T Collier, Statistician,  
30 Department of Medical Statistics, London School of Hygiene and Tropical Medicine,  
31 University of London, UK.  
32  
33  
34  
35  
36  
37

#### 38 39 40 *Health Economics Centre*

41 Martin J Buxton, Professor of Health Economics and Director: Health Economics Research  
42 Group, Brunel University, UK; Hema Mistry and Matthew Dyer, Research Fellows in Health  
43 Economics, Brunel University.  
44  
45

#### 46 47 48 *Primary Care Centres*

##### 49 *Denmark*

50 Intervention Centre: Sundhedscenteret Skanderborg. Dr Lisbeth Rosborg, GP/ Practice  
51 Manager; Susanne Holck Mogensen, Nurse.  
52

53 Usual Care Centre: Gasvej 5, 8700 Horsens. Dr Henrik Zanoni, GP; Lene Henriksen, Nurse.  
54  
55  
56  
57  
58  
59  
60

1  
2  
3  
4  
5  
6  
7  
8 *Italy*

9 Intervention Centre: Rive dai Stimatinis 12, 33013 Gemona del Friuli. Dr Beppino Colle,  
10 Primary Care Intervention Coordinator; Dr Massimiliano Rugolo, Principal Investigator/GP;  
11 Tilla Gurisatti, Nurse.  
12

13 Usual Care Centre: Via S. Valentino 20, 33100 Udine. Dr Mario Casini, Italy Usual Care  
14 Coordinator. Dr Fabrizio Gangi, Italy Usual Care PI/GP. Daniela Gurisatti and Loredana  
15 Trevisani, Nurses.  
16  
17  
18  
19

20  
21  
22 *Netherlands*

23 Intervention Centre: Gezondheidscentrum Hoensbroek-Noord. Dr Martijn van Nunen and Dr  
24 Bem Bruls, GPs; Jasja Janssen, Nurse; Mrs Mathil Sanders, Practice Manager.  
25 Usual Care Centre: Dr Mieke Winten-Huisman and Dr Marc Eyck, GPs; Rene van den  
26 Heuvel and Claudia Gessing, Nurses.  
27  
28  
29  
30

31  
32 *Poland*

33 Intervention Centre: Centrum Medycyny Profilaktycznej w Krakowie. Dr Krystyna Pająk,  
34 Principal Investigator; Lidia Dwojak, Practice Manager; Joanna Śladek-Ratajewicz, GP;  
35 Barbara Waligóra and Irena Smarzyńska, Nurses.  
36 Usual Care Centre: Podstawowa Opieka Zdrowotna - Szpital Uniwersytecki w Krakowie. Dr  
37 Maria Fornal, Principal Investigator; Dr Jolanta Walczewska, GP; Barbara Wojtanis and  
38 Helena Kamińska, Nurses.  
39  
40  
41  
42  
43  
44

45  
46 *Spain*

47 Intervention Centre: Centro de Salud Salvador Pau, Valencia. Dr Jorge Navarro, Principal  
48 Investigator; Gemma Méndez Pérez, Nurse; Dr. Maria Jose Donat, Dr. Raquel Prieto, Dr.  
49 Rosario Gonzalez, Dr. Teresa Almela, Dr. Amaparo Garcia and Dr. Francisco Cortes, GPs.  
50  
51  
52  
53  
54  
55  
56  
57  
58  
59  
60

1  
2  
3  
4  
5  
6 Usual Care Centre: Centro de Salud de Manises, Valencia. Dr Lorenzo Pascual, Principal  
7 Investigador; Rocio Marco, Nurse; Dr Juan Manuel García, Practice Manager; Dr Antonia  
8 Ibañez, Dr. Cecilia Ruiz, Dr. Santos Plaza, Dr. Amparo Moreno and Dr. Carmen Lloret, GPs.  
9  
10

11  
12  
13 *UK*

14 Intervention Centre: Seaside Medical Centre, Eastbourne. Dr Tim Gietzen, Principal  
15 Investigator; Sjouke Ashton, Nurse; George Bordoli, Associate Nurse; Daniel Brookbank and  
16 Angela Hughes, Practice Managers.  
17  
18

19 Usual Care Centre: Green Street Clinic, Eastbourne. Dr Ian McNaughton, Principal  
20 Investigator; Shirley Colvin, Nurse; Heather King, Practice Manager.  
21  
22

23  
24  
25 *Acknowledgement:* EUROACTION is an initiative of the European Society of Cardiology  
26 which highlights its commitment to improve the quality of life of the European population by  
27 reducing the impact of cardiovascular diseases. The study protocol conforms to the ethical  
28 guidelines of the 1995 Declaration of Helsinki with ethics committee approval in all countries  
29 and for every centre. Written informed consent was obtained from every subject.  
30  
31

32  
33 *Competing interest statement:* All authors declare that the answer to the questions on your  
34 competing interest form [bmj.com/cgi/content/full/317/7154/291/DC1](http://bmj.com/cgi/content/full/317/7154/291/DC1) are all No and therefore  
35 have nothing to declare.  
36  
37

38  
39 *Funding:* Sponsored solely by AstraZeneca through the provision of an unconditional  
40 educational grant. [AstraZeneca had no involvement in the study design; in the collection,](#)  
41 [analysis and interpretation of the data; in the writing of the report; and in the decision to](#)  
42 [submit the paper for publication.](#)  
43  
44

45 *Author contributions:* DW and MB are part of the steering committee and approved the  
46 protocol and the design for this matched paired cluster-randomised trial. DW was  
47 responsible for the overall direction of the project. HM and MD conducted the economic  
48 analysis under the supervision of SM and MB and with guidance from DW. KK was  
49 responsible for local data collection. HM drafted the manuscript with input from all authors;  
50 all authors have approved the final manuscript and were involved in the interpretation of the  
51 results.  
52  
53  
54  
55  
56  
57  
58  
59  
60



Table 1: Observed 1-year costs for EUROACTION study (in £ GBP)

| 2006/2007 prices    | Denmark        | Italy          | Netherlands    | Poland         | Spain          | UK             | Total          |
|---------------------|----------------|----------------|----------------|----------------|----------------|----------------|----------------|
| <b>Intervention</b> |                |                |                |                |                |                |                |
| N                   | 104            | 165            | 191            | 234            | 199            | 126            | 1,019          |
| Mean (SD)           | £589 (£379)    | £595 (£366)    | £756 (£466)    | £515 (£179)    | £588 (£269)    | £625 (£181)    | £608 (£329)    |
| Median              | £541           | £562           | £704           | £463           | £550           | £594           | £560           |
| IQR                 | £473 to £614   | £451 to £680   | £546 to £862   | £374 to £616   | £420 to £714   | £530 to £729   | £449 to £714   |
| Range               | £268 to £4,054 | £179 to £3,733 | £166 to £5,064 | £282 to £1,578 | £139 to £1,669 | £163 to £1,206 | £139 to £5,064 |
| <b>Usual Care</b>   |                |                |                |                |                |                |                |
| N                   | 154            | 194            | 123            | 160            | 193            | 181            | 1,005          |
| Mean (SD)           | £295 (£490)    | £201 (£365)    | £246 (£307)    | £159 (£167)    | £138 (£207)    | £307 (£563)    | £221 (£384)    |
| Median              | £193           | £146           | £125           | £105           | £68            | £196           | £142           |
| IQR                 | £152 to £275   | £104 to £198   | £84 to £250    | £84 to £159    | £56 to £122    | £140 to £303   | £90 to £225    |
| Range               | £98 to £3,364  | £70 to £4,455  | £65 to £2,806  | £60 to £1,255  | £40 to £2,173  | £73 to £6,500  | £40 to £6,500  |

**Table 2: Baseline characteristics**

Formatted: Font: 11 pt

|                                                                                        | <u>Intervention</u><br>(n = 1,019) | <u>Usual care</u><br>subsample<br>(n = 252) | <u>Usual care</u><br>all<br>(n = 1,005) | <u>Statistical test<sup>#</sup></u><br>(Int. vs. UC<br>subsample) | <u>Statistical test<sup>#</sup></u><br>(Int. vs. UC all) |
|----------------------------------------------------------------------------------------|------------------------------------|---------------------------------------------|-----------------------------------------|-------------------------------------------------------------------|----------------------------------------------------------|
| <u>Country</u>                                                                         |                                    |                                             |                                         |                                                                   |                                                          |
| <u>Denmark</u>                                                                         | <u>104 (10.2%)</u>                 | <u>40 (15.9%)</u>                           | <u>154 (15.3%)</u>                      |                                                                   |                                                          |
| <u>Italy</u>                                                                           | <u>165 (16.2%)</u>                 | <u>47 (18.7%)</u>                           | <u>194 (19.3%)</u>                      | <u>p = 0.012</u>                                                  | <u>p &lt; 0.001</u>                                      |
| <u>Netherlands</u>                                                                     | <u>191 (18.7%)</u>                 | <u>37 (14.7%)</u>                           | <u>123 (12.2%)</u>                      |                                                                   |                                                          |
| <u>Poland</u>                                                                          | <u>234 (23.0%)</u>                 | <u>45 (17.9%)</u>                           | <u>160 (15.9%)</u>                      |                                                                   |                                                          |
| <u>Spain</u>                                                                           | <u>199 (19.5%)</u>                 | <u>41 (16.3%)</u>                           | <u>193 (19.2%)</u>                      |                                                                   |                                                          |
| <u>UK</u>                                                                              | <u>126 (12.4%)</u>                 | <u>42 (16.7%)</u>                           | <u>181 (18.0%)</u>                      |                                                                   |                                                          |
| <u>Gender</u>                                                                          |                                    |                                             |                                         |                                                                   |                                                          |
| <u>Male</u>                                                                            | <u>507 (49.8%)</u>                 | <u>133 (52.8%)</u>                          | <u>577 (57.4%)</u>                      | <u>p = 0.390</u>                                                  | <u>p = 0.001</u>                                         |
| <u>Female</u>                                                                          | <u>512 (50.3%)</u>                 | <u>119 (47.2%)</u>                          | <u>428 (42.6%)</u>                      |                                                                   |                                                          |
| <u>Risk factors required for the</u><br><u>D'Agostino Equation [5]</u><br><u>n (%)</u> |                                    |                                             |                                         |                                                                   |                                                          |
| <u>Non-smoker</u>                                                                      | <u>695 (68.2%)</u>                 | <u>155 (61.5%)</u>                          | <u>-</u>                                | <u>p = 0.646</u>                                                  | <u>-</u>                                                 |
| <u>Has diabetes</u>                                                                    | <u>313 (30.7%)</u>                 | <u>68 (27.0%)</u>                           | <u>-</u>                                | <u>p = 0.247</u>                                                  | <u>-</u>                                                 |
| <u>On anti-hypertensive drugs</u>                                                      | <u>432 (42.4%)</u>                 | <u>97 (38.5%)</u>                           | <u>-</u>                                | <u>p = 0.260</u>                                                  | <u>-</u>                                                 |
| <u>Mean (SD)</u>                                                                       |                                    |                                             |                                         |                                                                   |                                                          |
| <u>Age</u>                                                                             | <u>60.5 (7.6)</u>                  | <u>60.4 (7.3)</u>                           | <u>61.3 (7.3)</u>                       | <u>p = 0.915</u>                                                  | <u>p = 0.011</u>                                         |
| <u>Systolic blood pressure (mm HG)</u>                                                 | <u>141.1 (18.6)</u>                | <u>141.6 (18.9)</u>                         | <u>-</u>                                | <u>p = 0.693</u>                                                  | <u>-</u>                                                 |
| <u>Total cholesterol (mmol/L)</u>                                                      | <u>5.70 (1.02)</u>                 | <u>5.45 (0.99)</u>                          | <u>-</u>                                | <u>p = 0.001</u>                                                  | <u>-</u>                                                 |
| <u>HDL cholesterol (mmol/L)</u>                                                        | <u>1.40 (0.39)</u>                 | <u>1.35 (0.36)</u>                          | <u>-</u>                                | <u>p = 0.047</u>                                                  | <u>-</u>                                                 |
| <u>10-year CVD risk at baseline</u>                                                    | <u>0.115</u><br><u>(0.087)</u>     | <u>0.120</u><br><u>(0.093)</u>              | <u>-</u>                                | <u>p = 0.426</u>                                                  | <u>-</u>                                                 |

<sup>#</sup> Chi-squared tests conducted for categorical variables and t tests conducted for continuous variables

Table 32: Results from cost-effectiveness model

|                                   | Duration of effect of intervention beyond the end of the trial (model time horizon = 11 <sup>th</sup> years in all cases) |                          |                          |                          |
|-----------------------------------|---------------------------------------------------------------------------------------------------------------------------|--------------------------|--------------------------|--------------------------|
|                                   | 0 years                                                                                                                   | 2 years                  | 5 years                  | 10 years                 |
| <b>Unadjusted costs and QALYs</b> |                                                                                                                           |                          |                          |                          |
| Usual care mean cost (SD)         | £2,727 (£29)                                                                                                              | £2,727 (£29)             | £2,727 (£29)             | £2,727 (£29)             |
| Intervention mean cost (SD)       | £3,146 (£33)                                                                                                              | £3,126 (£31)             | £3,105 (£31)             | £3,089 (£31)             |
| Usual care mean QALYs (SD)        | 6.755 (0.021)                                                                                                             | 6.755 (0.021)            | 6.755 (0.021)            | 6.755 (0.021)            |
| Intervention mean QALYs (SD)      | 6.831 (0.021)                                                                                                             | 6.835 (0.021)            | 6.838 (0.021)            | 6.840 (0.021)            |
| Incremental costs (95% CI)        | £419 (£332 to £505)                                                                                                       | £399 (£315 to £483)      | £378 (£294 to £462)      | £362 (£278 to £447)      |
| Incremental QALYs (95% CI)        | 0.076 (0.017 to 0.135)                                                                                                    | 0.079 (0.020 to 0.138)   | 0.083 (0.024 to 0.142)   | 0.085 (0.026 to 0.144)   |
| ICER                              | £5,539                                                                                                                    | £5,031                   | £4,561                   | £4,266                   |
| 95% CI                            | £2,625 to £29,627                                                                                                         | £2,412 to £22,520        | £2,202 to £18,155        | £2,059 to £15,945        |
| % of bootstrapped ICERs < £20k    | 95.7%                                                                                                                     | 97.0%                    | 97.9%                    | 98.4%                    |
| % of bootstrapped ICERs < £30k    | 97.6%                                                                                                                     | 98.4%                    | 99.0%                    | 99.2%                    |
| <b>Adjusted costs and QALYs†</b>  |                                                                                                                           |                          |                          |                          |
| Incremental costs (95% CI)        | £474 (£368 to £580)                                                                                                       | £463 (£358 to £568)      | £450 (£343 to £557)      | £441 (£331 to £550)      |
| Incremental QALYs (95% CI)        | -0.009 (-0.041 to 0.023)                                                                                                  | -0.007 (-0.038 to 0.025) | -0.005 (-0.036 to 0.027) | -0.003 (-0.035 to 0.029) |
| ICER                              | Dominated†                                                                                                                | Dominated†               | Dominated†               | Dominated†               |
| 95% CI                            | £21,695 to dominated†                                                                                                     | £18,495 to dominated†    | £15,908 to dominated†    | £14,485 to dominated†    |

|                               |       |       |       |        |
|-------------------------------|-------|-------|-------|--------|
| % of bootstrapped ICERs <£20k | 1.97% | 3.16% | 4.57% | 5.76%  |
| % of bootstrapped ICERs <£30k | 5.05% | 6.98% | 9.42% | 11.54% |

SD = standard deviation; QALYs = quality-adjusted life years; ICER = incremental cost-effectiveness ratio; CI = confidence interval

<sup>#</sup> 1 year study follow-up period plus a 10 year model

† The intervention is more costly and yield fewer QALYs than usual care

‡ Adjusting for the following baseline characteristics: age, gender, age\*gender, country, total and HDL cholesterol, SBP, anti-hypertensive medications, smoking and diabetes.

**Figure 1a: One-year observed costs for the Intervention and Usual Care groups split by type**

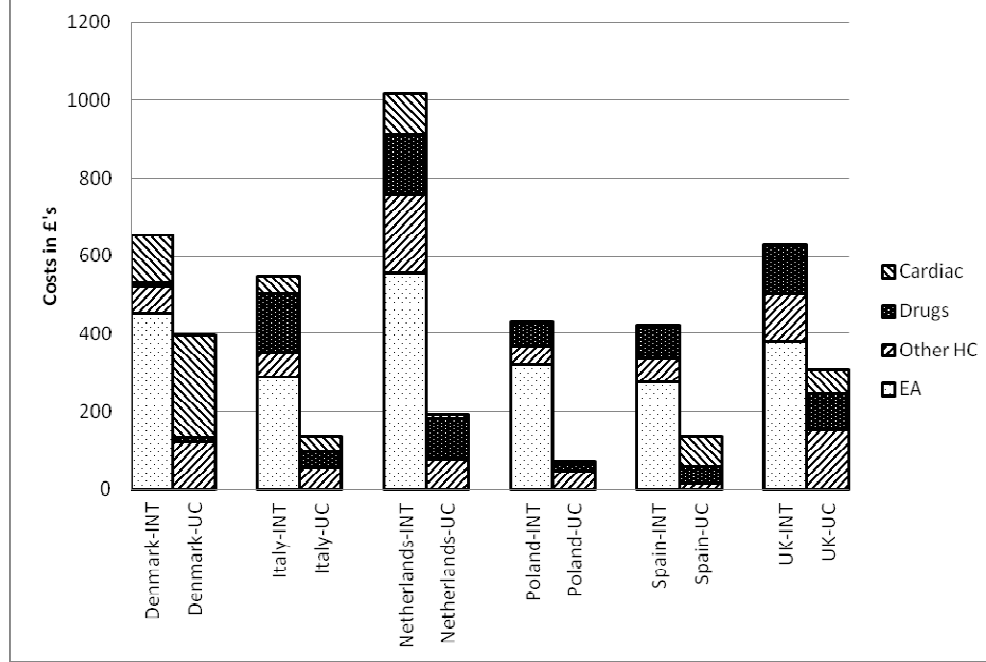

Key: EA = EuroAction costs; Other HC = other health care costs; Drugs = cardiac related medication costs; Cardiac = cardiac procedure costs

**Figure 1b: Mean costs for the Intervention and Usual Care groups for the main health states in the Markov model**

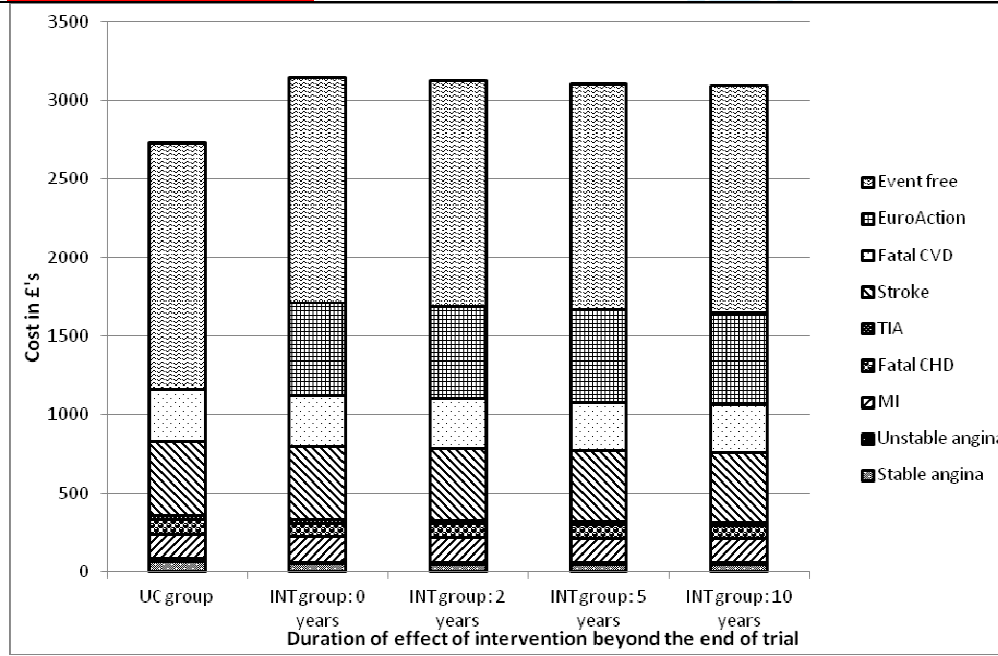

Figure 24: Cost-effectiveness acceptability curves

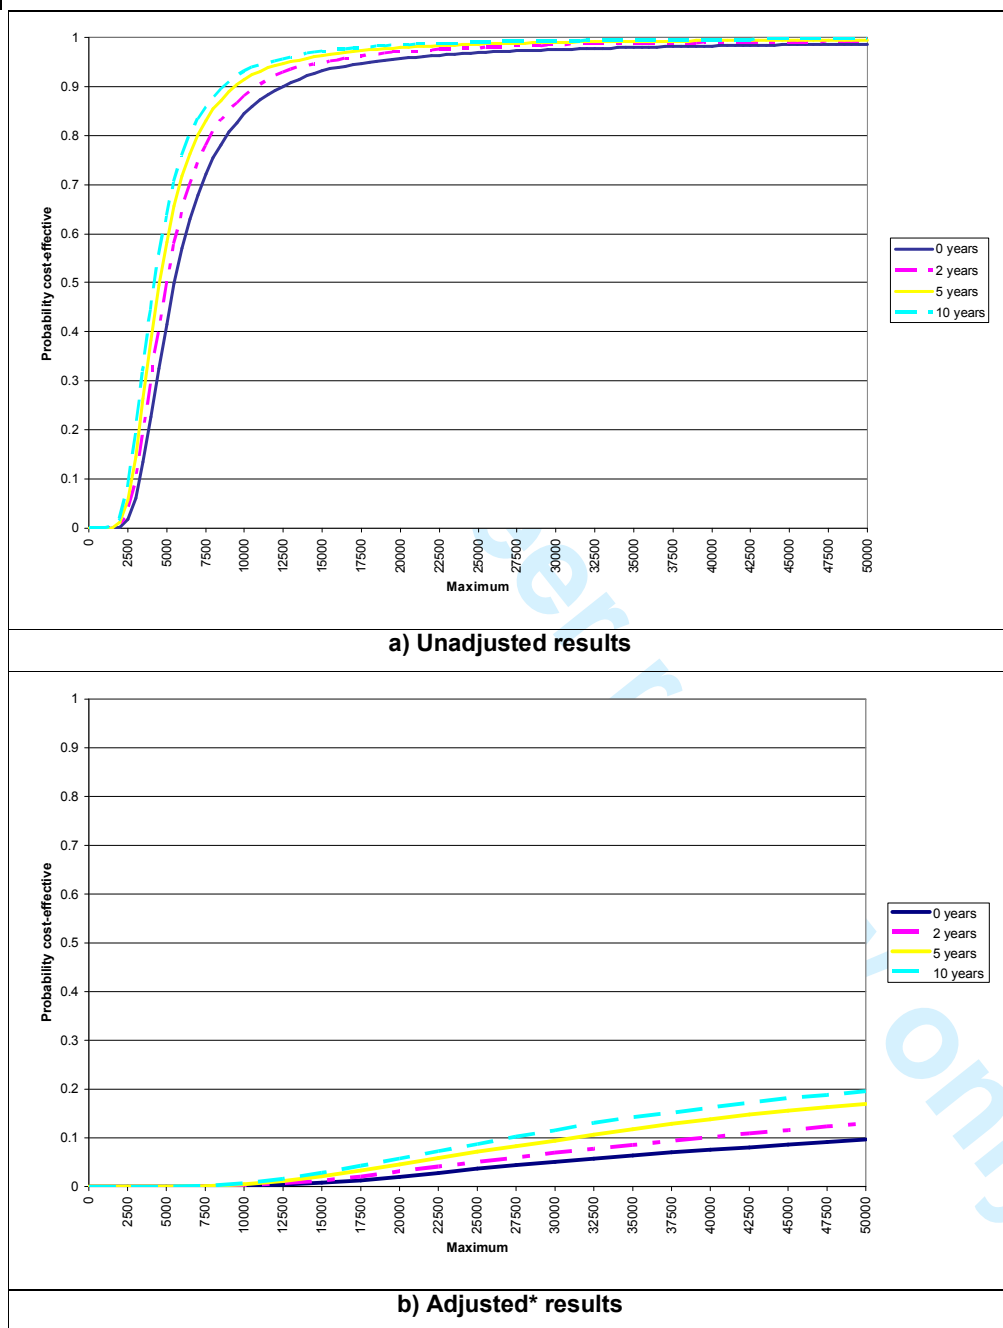

\* Adjusted for differences between groups by age, gender, country and baseline risk factors

## References

1. Graham I, Atar D, Borch-Johnsen K, et al. European guidelines on cardiovascular disease prevention in clinical practice: executive summary. Fourth Joint Task Force of the European Society of Cardiology and Other Societies on Cardiovascular Disease Prevention in Clinical Practice (Constituted by representatives of nine societies and by invited experts). *Eur Heart J* 2007;28:2375-2414.
2. Kotseva K, Wood D, De Backer G, De Bacquer D, Pyörälä K, Reiner Z, Keil U, on behalf of the EUROASPIRE Study Group. EUROASPIRE III. Management of cardiovascular risk factors in asymptomatic high-risk patients in general practice: cross-sectional survey in 12 European countries. *Eur J Cardiovasc Prev Rehabil* 2010;17:530-540.
3. Wood DA, Kotseva K, Jennings C, et al on behalf of the EUROACTION Study Group. EUROACTION: A European Society of Cardiology demonstration project in preventive cardiology. *Eur Heart J* 2004;6(Supplement J):J3-J15.
4. Wood DA, Kotseva K, Connolly S, et al. Nurse-coordinated multidisciplinary, family-based cardiovascular disease prevention programme (EUROACTION) for patients with coronary heart disease and asymptomatic individuals at high risk of cardiovascular disease: a paired, cluster-randomised controlled trial. *Lancet* 2008;371:1999-2012.
5. D'Agostino RB, Vasan RS, Pencina MJ et al. General cardiovascular risk profile for use in primary care. The Framingham Heart Study. *Circulation* 2008;117:743-53.
6. Miller DK, Homan SM. Determining transition probabilities: confusion and suggestion. *Med Decis Making* 1994;14:52-8.

- 1  
2  
3  
4  
5  
6  
7  
8 7. Sutcliffe SJ, Fox KF, Wood DA, et al. Incidence of coronary heart disease in a health  
9 authority in London: review of a community register. *BMJ* 2003;326:20.  
10
- 11  
12  
13 8. Bamford J, Sandercock P, Dennis M, et al. A prospective study of acute  
14 cerebrovascular disease in the community: the Oxfordshire Community Stroke  
15 Project 1981–86. I. Methodology, demography and incident cases of first-ever stroke.  
16  
17 *J Neurol Neurosurg Psychiatry* 1988;51:1373–80.  
18  
19
- 20  
21  
22 9. Dennis MS, Bamford JM, Sandercock PA, Warlow CP. Incidence of transient  
23 ischemic attacks in Oxfordshire, England. *Stroke* 1989;20:333–9.  
24  
25
- 26  
27  
28 10. Ward S, Lloyd Jones M, Pandor A, et al. A systematic review and economic  
29 evaluation of statins for the prevention of coronary events. *Health Technology*  
30 *Assessment* 2007;11(14).  
31  
32
- 33  
34  
35 11. Briggs A, Mihaylova B, Sculpher M, et al. Cost-effectiveness of perindopril in  
36 reducing cardiovascular events in patients with stable coronary artery disease using  
37 data from the EUROPA study. *Heart* 2007;93:1081-6.  
38  
39
- 40  
41  
42 12. Organisation for Economic Co-operation and Development (OECD CPI). OECD  
43 Consumer Price Indices. July 2007. Available at: <http://www.oecd.org/>  
44  
45
- 46  
47  
48 13. Kind P, Dolan P, Gudex C, Williams A. Variations in population health status: results  
49 from a United Kingdom national questionnaire survey. *BMJ* 1998;316:736–41.  
50  
51
- 52  
53  
54 14. National Institute for Health and Clinical Excellence (NICE). Guide to methods of  
55 technology appraisal. London, June 2008.  
56  
57



- 1  
2  
3  
4  
5  
6  
7  
8 15. StataCorp. Stata Statistical Software: Release 10.0. College Station, Texas, USA:  
9 Stata Corporation, 2007.  
10  
11  
12  
13 16. Ridker PM, Buring JE, Rifai N, Cook NR. Development and validation of improved  
14 algorithms for the assessment of global cardiovascular risk in women: the Reynolds  
15 Risk Score. *JAMA* 2007;297:611-9.  
16  
17  
18  
19  
20 17. Woodward M, Brindle P, Tunstall-Pedoe H. SIGN group on risk estimation. Adding  
21 social deprivation and family history to cardiovascular risk assessment: the ASSIGN  
22 score from the Scottish Heart Health Extended Cohort (SHHEC). *Heart* 2007;93:172-  
23 6.  
24  
25  
26  
27  
28  
29 18. Yusuf S, Hawken S, Ounpuu S, et al. Effect of potentially modifiable risk factors  
30 associated with myocardial infarction in 52 countries (the INTERHEART study): case-  
31 control study. *Lancet* 2004;364:937-52.  
32  
33  
34  
35  
36 19. Fleming P, Godwin M. Lifestyle interventions in primary care: systematic review of  
37 randomized controlled trials. *Can Fam Physician* 2008;54:1706-13  
38  
39  
40  
41 20. Imperial Cancer Research Fund OXCHECK Study Group. Effectiveness of health  
42 checks conducted by nurses in primary care: final results of the OXCHECK study.  
43  
44  
45 *BMJ* 1995;310:1099-1104  
46  
47  
48  
49  
50  
51  
52  
53  
54  
55  
56  
57  
58  
59  
60

## Appendix

Table A1: Costs of health states in cost-effectiveness model

| Health State         | Cost (2006 prices) | Assumption/Source                                                                                                                                                                               | Source                  |
|----------------------|--------------------|-------------------------------------------------------------------------------------------------------------------------------------------------------------------------------------------------|-------------------------|
| Event-Free           | £197               | Based on a mean cost of cardiac-related medication and health care contacts (outside of EUROACTION programme) incurred by all patients during one year follow-up                                | Trial data              |
| Stable Angina        | £383               | Based on 3 times 15 minutes' GP contact plus medication (plus cost of event-free)                                                                                                               | Ward et al, 2007 [10]   |
| Post-stable angina   | £383               | Based on 3 times 15 minutes' GP contact plus medication costs (plus cost of event-free)                                                                                                         | Ward et al, 2007 [10]   |
| Unstable angina      | £674               | Based on 3 times 15 minutes' GP contact plus medication plus 60% of patients are also prescribed clopidogrel (plus cost of event-free)                                                          | Ward et al, 2007 [10]   |
| Post-unstable angina | £383               | Based on 3 times 15 minutes' GP contact plus medication costs (plus cost of event-free)                                                                                                         | Ward et al, 2007 [10]   |
| MI                   | £5,020             | Based on data from Nottingham Heart Attack Register include revascularisation for a proportion of patients, plus primary care and medication costs as unstable angina (plus cost of event-free) | Palmer et al, 2002 [21] |
| Post-MI              | £383               | Based on 3 times 15 minutes' GP contact plus medication costs (plus cost of event-free)                                                                                                         | Ward et al, 2007 [10]   |
| Fatal CHD event      | £1,462             | Based on costs of a fatal MI (plus cost of event-free)                                                                                                                                          | Clarke et al, 2003 [22] |
| TIA                  | £1,351             | Based on medication costs plus costs of test and surgery for appropriate patients (plus cost of event-free)                                                                                     | Ward et al, 2007 [10]   |
| Post-TIA             | £483               | Based on medication costs only (plus cost of event-free)                                                                                                                                        | Ward et al, 2007 [10]   |

|                 |        |                                                                                                                                                |                         |
|-----------------|--------|------------------------------------------------------------------------------------------------------------------------------------------------|-------------------------|
| Stroke          | £8,922 | Based on cost of acute events (mild, moderate and severe stroke) and weighted by distribution of severity of strokes (plus cost of event-free) | Youman et al, 2003 [23] |
| Post-Stroke     | £2,543 | Based on cost of acute events (mild, moderate and severe stroke) and weighted by distribution of severity of strokes (plus cost of event-free) | Youman et al, 2003 [23] |
| Fatal CVD event | £7,832 | Based on cost of fatal stroke (plus cost of event-free)                                                                                        | Youman et al, 2003 [23] |

**Table A2: Utility values for health states used in the model**

| Utility value | Event free | Stable angina | Unstable angina | MI    | TIA   | Stroke |
|---------------|------------|---------------|-----------------|-------|-------|--------|
| 45 - 49       | 0.869      | 0.702         | 0.669           | 0.660 | 0.869 | 0.547  |
| 50 - 54       | 0.848      | 0.685         | 0.653           | 0.644 | 0.848 | 0.533  |
| 55 - 59       | 0.826      | 0.667         | 0.636           | 0.628 | 0.826 | 0.520  |
| 60 - 64       | 0.805      | 0.650         | 0.620           | 0.612 | 0.805 | 0.506  |
| 65 - 69       | 0.784      | 0.633         | 0.604           | 0.596 | 0.784 | 0.493  |
| 70 - 74       | 0.763      | 0.617         | 0.588           | 0.580 | 0.763 | 0.480  |
| 75 - 79       | 0.741      | 0.599         | 0.571           | 0.563 | 0.741 | 0.466  |
| 80 - 84       | 0.720      | 0.582         | 0.544           | 0.547 | 0.720 | 0.453  |
| 85 - 89       | 0.699      | 0.565         | 0.538           | 0.531 | 0.699 | 0.440  |
| 90 - 94       | 0.678      | 0.548         | 0.522           | 0.515 | 0.678 | 0.426  |
| 95 - 99       | 0.656      | 0.530         | 0.505           | 0.499 | 0.656 | 0.413  |
| 100 +         | 0.635      | 0.513         | 0.489           | 0.483 | 0.635 | 0.399  |

Sources: Event free (Kind et al, 1998) [13]; Stable angina (Meslop et al, 2003) [24]; Unstable angina and MI (Goodacre et al, 2004) [25]; TIA (Kind et al, 1998) [13]; Stroke (Tengs et al, 2003) [26]

1  
2  
3  
4  
5  
6  
7  
8  
9  
10  
11  
12  
13  
14  
15  
16  
17  
18  
19  
20  
21  
22  
23  
24  
25  
26  
27  
28  
29  
30  
31  
32  
33  
34  
35  
36  
37  
38  
39  
40  
41  
42  
43  
44  
45  
46  
47  
48  
49

**Table A3: Regression results from adjusted<sup>#</sup> cost-effectiveness analysis (Duration of effect of intervention beyond the end of the trial = 0 years)**

|                                            | <b>Costs</b>       |                       |              |                   | <b>QALYs</b>       |                       |               |                   |
|--------------------------------------------|--------------------|-----------------------|--------------|-------------------|--------------------|-----------------------|---------------|-------------------|
|                                            | <u>Coefficient</u> | <u>Standard error</u> | <u>t</u>     | <u>p value</u>    | <u>Coefficient</u> | <u>Standard error</u> | <u>t</u>      | <u>p value</u>    |
| <u>Group</u><br>(1 = intervention; 0 = UC) | <u>474.40</u>      | <u>54.04</u>          | <u>8.78</u>  | <u>&lt; 0.001</u> | <u>-0.009</u>      | <u>0.016</u>          | <u>-0.56</u>  | <u>0.575</u>      |
| <u>Gender</u>                              | <u>1544.10</u>     | <u>273.27</u>         | <u>5.65</u>  | <u>&lt; 0.001</u> | <u>-0.826</u>      | <u>0.082</u>          | <u>-10.09</u> | <u>&lt; 0.001</u> |
| <u>Age</u>                                 | <u>57.68</u>       | <u>3.24</u>           | <u>17.80</u> | <u>&lt; 0.001</u> | <u>-0.090</u>      | <u>0.001</u>          | <u>-92.79</u> | <u>&lt; 0.001</u> |
| <u>Gender*Age</u>                          | <u>-33.11</u>      | <u>4.45</u>           | <u>-7.44</u> | <u>&lt; 0.001</u> | <u>0.017</u>       | <u>0.001</u>          | <u>13.12</u>  | <u>&lt; 0.001</u> |
| <u>Italy</u>                               | <u>106.34</u>      | <u>58.58</u>          | <u>1.82</u>  | <u>0.070</u>      | <u>-0.022</u>      | <u>0.018</u>          | <u>-1.26</u>  | <u>0.206</u>      |
| <u>Spain</u>                               | <u>89.71</u>       | <u>60.31</u>          | <u>1.49</u>  | <u>0.137</u>      | <u>-0.041</u>      | <u>0.018</u>          | <u>-2.26</u>  | <u>0.024</u>      |
| <u>Poland</u>                              | <u>32.58</u>       | <u>58.81</u>          | <u>0.55</u>  | <u>0.580</u>      | <u>-0.045</u>      | <u>0.018</u>          | <u>-2.56</u>  | <u>0.010</u>      |
| <u>Denmark</u>                             | <u>188.87</u>      | <u>62.34</u>          | <u>3.03</u>  | <u>0.002</u>      | <u>-0.063</u>      | <u>0.019</u>          | <u>-3.38</u>  | <u>0.001</u>      |
| <u>Netherlands</u>                         | <u>162.83</u>      | <u>61.34</u>          | <u>2.65</u>  | <u>0.008</u>      | <u>-0.058</u>      | <u>0.018</u>          | <u>-3.17</u>  | <u>0.002</u>      |
| <u>Total cholesterol</u>                   | <u>3.64</u>        | <u>0.58</u>           | <u>6.24</u>  | <u>&lt; 0.001</u> | <u>-0.001</u>      | <u>0.000</u>          | <u>-4.32</u>  | <u>&lt; 0.001</u> |
| <u>HDL cholesterol</u>                     | <u>-13.76</u>      | <u>1.57</u>           | <u>-8.77</u> | <u>&lt; 0.001</u> | <u>0.002</u>       | <u>0.000</u>          | <u>4.29</u>   | <u>&lt; 0.001</u> |
| <u>Systolic blood pressure</u>             | <u>13.38</u>       | <u>1.20</u>           | <u>11.19</u> | <u>&lt; 0.001</u> | <u>-0.002</u>      | <u>0.000</u>          | <u>-4.70</u>  | <u>&lt; 0.001</u> |
| <u>Anti-hypertensive drugs</u>             | <u>346.22</u>      | <u>41.47</u>          | <u>8.35</u>  | <u>&lt; 0.001</u> | <u>-0.051</u>      | <u>0.012</u>          | <u>-4.12</u>  | <u>&lt; 0.001</u> |
| <u>Diabetes</u>                            | <u>588.88</u>      | <u>46.62</u>          | <u>12.63</u> | <u>&lt; 0.001</u> | <u>-0.116</u>      | <u>0.014</u>          | <u>-8.35</u>  | <u>&lt; 0.001</u> |
| <u>Smoking</u>                             | <u>392.41</u>      | <u>43.48</u>          | <u>9.02</u>  | <u>&lt; 0.001</u> | <u>-0.055</u>      | <u>0.013</u>          | <u>-4.20</u>  | <u>&lt; 0.001</u> |

1  
2  
3  
4  
5  
6  
7  
8  
9  
10  
11  
12  
13  
14  
15  
16  
17  
18  
19  
20  
21  
22  
23  
24  
25  
26  
27  
28  
29  
30  
31  
32  
33  
34  
35  
36  
37  
38  
39  
40  
41  
42  
43  
44  
45  
46  
47  
48  
49

|                                 |                 |               |               |                   |               |              |               |                   |
|---------------------------------|-----------------|---------------|---------------|-------------------|---------------|--------------|---------------|-------------------|
| <u>Total cholesterol*</u>       | <u>-362.52</u>  | <u>544.24</u> | <u>-0.67</u>  | <u>0.505</u>      | <u>0.037</u>  | <u>0.163</u> | <u>0.22</u>   | <u>0.823</u>      |
| <u>HDL cholesterol*</u>         | <u>238.80</u>   | <u>536.53</u> | <u>0.45</u>   | <u>0.656</u>      | <u>0.023</u>  | <u>0.161</u> | <u>0.15</u>   | <u>0.884</u>      |
| <u>Systolic blood pressure*</u> | <u>157.56</u>   | <u>232.32</u> | <u>0.68</u>   | <u>0.498</u>      | <u>-0.066</u> | <u>0.070</u> | <u>-0.94</u>  | <u>0.346</u>      |
| <u>Anti-hypertensive drugs*</u> | <u>230.88</u>   | <u>143.30</u> | <u>1.61</u>   | <u>0.107</u>      | <u>-0.046</u> | <u>0.043</u> | <u>-1.07</u>  | <u>0.284</u>      |
| <u>Smoking*</u>                 | <u>-302.10</u>  | <u>226.48</u> | <u>-1.33</u>  | <u>0.182</u>      | <u>0.044</u>  | <u>0.068</u> | <u>0.65</u>   | <u>0.513</u>      |
| <u>Constant</u>                 | <u>-3068.89</u> | <u>280.08</u> | <u>-10.96</u> | <u>&lt; 0.001</u> | <u>12.572</u> | <u>0.084</u> | <u>149.96</u> | <u>&lt; 0.001</u> |
| Number of observations          | <u>2,024</u>    |               |               |                   | <u>2,024</u>  |              |               |                   |
| <u>R<sup>2</sup></u>            | <u>0.472</u>    |               |               |                   | <u>0.896</u>  |              |               |                   |

\* Regression model adjusting for the following baseline characteristics: age, gender, age\*gender, country, total and HDL cholesterol, SBP, anti-hypertensive medications, smoking and diabetes.  
 \* Dummy variables created to indicate missing values for each of the risk characteristics

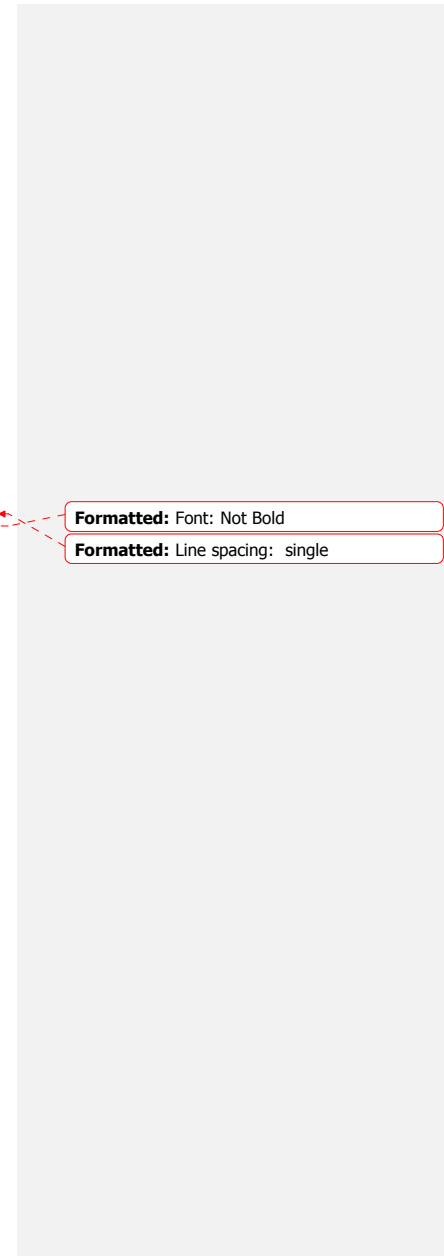

Formatted: Font: Not Bold  
 Formatted: Line spacing: single

**Table A43: Additional results from the cost-effectiveness model**

|                                                | Duration of effect of intervention beyond the end of the trial (model time horizon = 11* years in all cases) |                          |                          |                          |
|------------------------------------------------|--------------------------------------------------------------------------------------------------------------|--------------------------|--------------------------|--------------------------|
|                                                | 0 years                                                                                                      | 2 years                  | 5 years                  | 10 years                 |
| <b>Adjusted costs and QALYs</b>                |                                                                                                              |                          |                          |                          |
| <i>Controlling for age and gender only</i>     |                                                                                                              |                          |                          |                          |
| Incremental costs (95% CI)                     | £512 (£438 to £589)                                                                                          | £491 (£418 to £563)      | £468 (£396 to £541)      | £452 (£378 to £525)      |
| Incremental QALYs (95% CI)                     | -0.016 (-0.036 to 0.004)                                                                                     | -0.012 (-0.032 to 0.008) | -0.008 (-0.028 to 0.012) | -0.006 (-0.026 to 0.014) |
| ICER                                           | Dominated†                                                                                                   | Dominated†               | Dominated†               | Dominated†               |
| 95% CI                                         | £105,653 to dominated†                                                                                       | £54,307 to dominated†    | £34,845 to dominated†    | £27,907 to dominated†    |
| % of bootstrapped ICERs <£20k                  | 0.01%                                                                                                        | 0.10%                    | 0.34%                    | 0.71%                    |
| % of bootstrapped ICERs <£30k                  | 0.19%                                                                                                        | 0.52%                    | 1.69%                    | 3.11%                    |
| <i>Controlling for age, gender and country</i> |                                                                                                              |                          |                          |                          |
| Incremental costs (95% CI)                     | £497 (£424 to £571)                                                                                          | £476 (£404 to £548)      | £453 (£381 to £526)      | £436 (£364 to £509)      |
| Incremental QALYs (95% CI)                     | -0.011 (-0.031 to 0.009)                                                                                     | -0.007 (-0.027 to 0.013) | -0.003 (-0.023 to 0.017) | -0.001 (-0.021 to 0.019) |
| ICER                                           | Dominated†                                                                                                   | Dominated†               | Dominated†               | Dominated†               |
| 95% CI                                         | £49,903 to dominated†                                                                                        | £33,290 to dominated†    | £24,001 to dominated†    | £20,342 to dominated†    |
| % of bootstrapped ICERs <£20k                  | 0.07%                                                                                                        | 0.34%                    | 1.11%                    | 2.32%                    |
| % of bootstrapped ICERs <£30k                  | 0.61%                                                                                                        | 1.81%                    | 4.78%                    | 7.76%                    |

SD = standard deviation; QALYs = quality-adjusted life years; ICER = incremental cost-effectiveness ratio; CI = confidence interval

\* 1 year study follow-up period plus a 10 year model

† The intervention is more costly and yield fewer QALYs than usual care

**Table A5: Results from matched age-sex analysis**

|                                   | <b>Duration of effect of intervention beyond the end of the trial = 10 years (model time horizon = 11<sup>#</sup> years in all cases)</b> |                                 |                                 |                                 |
|-----------------------------------|-------------------------------------------------------------------------------------------------------------------------------------------|---------------------------------|---------------------------------|---------------------------------|
|                                   | <b>Men &lt; 65 years</b>                                                                                                                  | <b>Men &gt;= 65 years</b>       | <b>Women &lt; 65 years</b>      | <b>Women &gt; = 65 years</b>    |
| <b>Unadjusted costs and QALYs</b> |                                                                                                                                           |                                 |                                 |                                 |
| <b>Incremental costs (95% CI)</b> | <b>£413 (£290 to £536)</b>                                                                                                                | <b>£527 (£237 to £817)</b>      | <b>£387 (£304 to £471)</b>      | <b>£546 (£376 to £717)</b>      |
| <b>Incremental QALYs (95% CI)</b> | <b>0.040 (-0.016 to 0.096)</b>                                                                                                            | <b>-0.057 (-0.181 to 0.068)</b> | <b>0.026 (-0.017 to 0.069)</b>  | <b>-0.043 (-0.139 to 0.052)</b> |
| <b>ICER</b>                       | <b>£10,298</b>                                                                                                                            | <b>Dominated‡</b>               | <b>£15,006</b>                  | <b>Dominated‡</b>               |
| <b>Adjusted costs and QALYs‡</b>  |                                                                                                                                           |                                 |                                 |                                 |
| <b>Incremental costs (95% CI)</b> | <b>£457 (£282 to £631)</b>                                                                                                                | <b>£360 (£83 to £803)</b>       | <b>£430 (£313 to £548)</b>      | <b>£466 (£222 to £710)</b>      |
| <b>Incremental QALYs (95% CI)</b> | <b>-0.008 (-0.063 to 0.048)</b>                                                                                                           | <b>-0.014 (-0.212 to 0.183)</b> | <b>-0.011 (-0.041 to 0.020)</b> | <b>-0.000 (-0.052 to 0.051)</b> |
| <b>ICER</b>                       | <b>Dominated‡</b>                                                                                                                         | <b>Dominated‡</b>               | <b>Dominated‡</b>               | <b>Dominated‡</b>               |

SD = standard deviation; QALYs = quality-adjusted life years; ICER = incremental cost-effectiveness ratio; CI = confidence interval

<sup>#</sup> 1 year study follow-up period plus a 10 year model

‡ The intervention is more costly and yield fewer QALYs than usual care

‡ Adjusting for the following baseline characteristics: age, gender, age\*gender, country, total and HDL cholesterol, SBP, anti-hypertensive medications, smoking and diabetes.



1  
2  
3  
4  
5  
6  
7  
8  
9  
10  
11  
12  
13  
14  
15  
16  
17  
18  
19  
20  
21  
22  
23  
24  
25  
26  
27  
28  
29  
30  
31  
32  
33  
34  
35  
36  
37  
38  
39  
40  
41  
42  
43  
44  
45  
46  
47  
48  
49  
50  
51  
52  
53  
54  
55  
56  
57  
58  
59  
60

Figure A1: Adjusted cost-effectiveness results

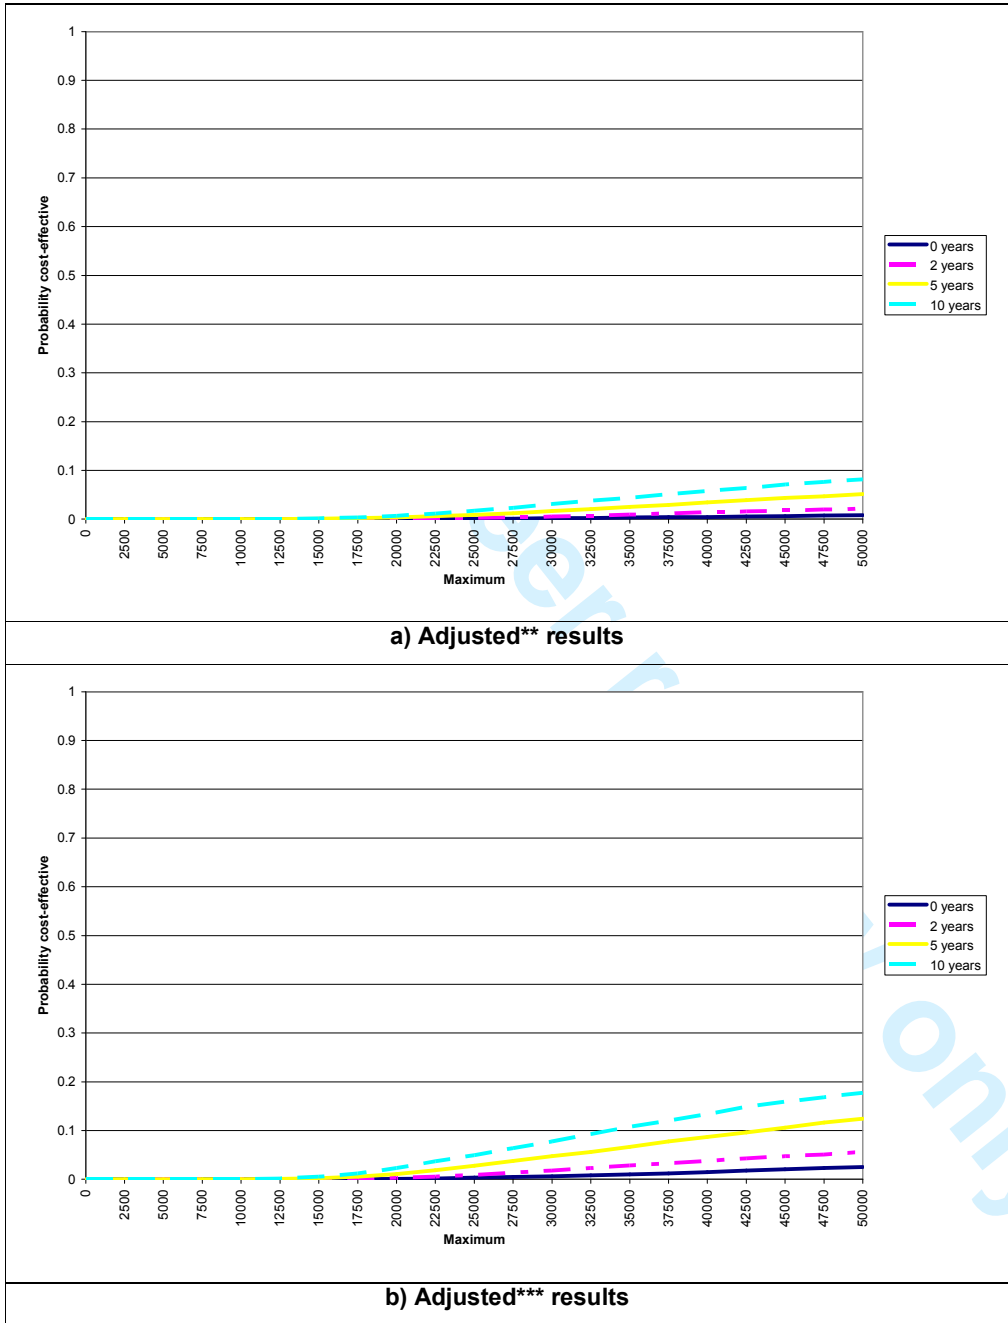

\*\* Adjusted for differences between groups by age and gender  
 \*\*\* Adjusted for differences between groups by age, gender and country

**Additional References for Appendix**

- 1  
2  
3  
4  
5  
6  
7  
8  
9  
10  
11  
12  
13  
14  
15  
16  
17  
18  
19  
20  
21  
22  
23  
24  
25  
26  
27  
28  
29  
30  
31  
32  
33  
34  
35  
36  
37  
38  
39  
40  
41  
42  
43  
44  
45  
46  
47  
48  
49  
50  
51  
52  
53  
54  
55  
56  
57  
58  
59  
60
21. Palmer S, Sculpher M, Philips Z, et al. A cost-effectiveness model comparing alternative management strategies for the use of glycoprotein IIb/IIIa antagonists in non-ST-elevation acute coronary syndrome. Report to the National Institute for Health and Clinical Excellence. <http://www.nice.org.uk/Docref.asp?d=32030>. London: NICE; 2002.
22. Clarke P, Gray A, Legood R, Briggs A, Holman R. The impact of diabetes-related complications on healthcare costs: results from the United Kingdom Prospective Diabetes Study (UKPDS Study No. 65). *Diabet Med* 2003;20:442–50.
23. Youman P, Wilson K, Harraf F, Kalra L. The economic burden of stroke in the United Kingdom. *Pharmacoeconomics* 2003;21(Suppl 1):43–50.
24. Meslop K, Boothroyd DB, Hlatky MA. Quality of life and time trade-off utility measures in patients with coronary artery disease. *Am Heart J* 2003;145:36–41.
25. Goodacre S, Nicholl J, Dixon S, et al. Randomised controlled trial and economic evaluation of a chest pain observation unit compared with routine care. *BMJ* 2004;328:254.
26. Tengs TO, Lin TH. A meta-analysis of quality of life estimates for stroke. *Pharmacoeconomics* 2003;21:191–200.

**Cost-effectiveness of a European preventive cardiology programme in primary care**

Hema Mistry, Stephen Morris, Matthew Dyer, Kornelia Kotseva, David Wood, Martin Buxton  
and on behalf of the EUROACTION study group

**Health economics checklist**

| Requirement                                                                                       | Manuscript page |
|---------------------------------------------------------------------------------------------------|-----------------|
| <b>Study design</b>                                                                               |                 |
| (1) The research question is stated                                                               | 2, 4            |
| (2) The economic importance of the research question is stated                                    | 2, 4            |
| (3) The viewpoint(s) of the analysis are clearly stated and justified                             | 2,5             |
| (4) The rationale for choosing the alternative programmes or interventions compared is stated     | 4               |
| (5) The alternatives being compared are clearly described                                         | 5               |
| (6) The form of economic evaluation used is stated                                                | 4,9             |
| (7) The choice of form of economic evaluation is justified in relation to the questions addressed | 9               |
| <b>Data collection</b>                                                                            |                 |
| (8) The source(s) of effectiveness estimates used are stated                                      | 9               |
| (9) Details of the design and results of effectiveness study are given                            | 9, 11           |
| (10) Method of synthesis/meta-analysis of estimates are given                                     | NA              |
| (11) The primary outcome measure(s) for the economic evaluation are clearly stated                | 2, 9            |
| (12) Methods to value health states and other benefits are stated                                 | 9               |
| (13) Details of the subjects from whom valuations were obtained are given                         | 9               |
| (14) Productivity changes (if included) are reported separately                                   | NA              |
| (15) The relevance of productivity changes to question is discussed                               | NA              |
| (16) Quantities of resources are reported separately from their unit costs                        | 7-9,<br>26-27   |
| (17) Methods for the estimation of quantities and unit costs are described                        | 7-9             |
| (18) Currency and price data are recorded                                                         | 8               |
| (19) Details of currency of price adjustments for inflation or currency conversion are given      | 8               |
| (20) Details of any model used are given                                                          | 5-10            |
| (21) The choice of model used and the key parameters are justified                                | 5-10            |
| <b>Analysis and interpretation of results</b>                                                     |                 |
| (22) Time horizon of costs and benefits is stated                                                 | 9               |
| (23) The discount rate(s) is stated                                                               | 9               |
| (24) The choice of rate(s) is justified                                                           | 9               |
| (25) An explanation is given if costs or benefits are not discounted                              | NA              |
| (26) Details of statistical tests and confidence intervals are given for stochastic data          | 9-10            |
| (27) The approach to sensitivity analysis is given                                                | 10              |
| (28) The choice of variables for sensitivity analysis is justified                                | 10              |
| (29) The ranges over which the variables are varied are stated                                    | 10              |
| (30) Relevant alternatives are compared                                                           | 11-12           |
| (31) Incremental analysis is reported                                                             | 11-12           |
| (32) Major outcomes are presented in a disaggregated as well as aggregated form                   | 11-12,<br>20-21 |
| (33) The answer to the study question is given                                                    | 12, 14          |
| (34) Conclusions follow from the data reported                                                    | 12-14           |
| (35) Conclusions are accompanied by the appropriate caveats                                       | 12-14           |
